# Supplementary material
Source: PubMed Central journal article supplement (PMC3197799)
Supplement: NIHMS315231-supplement-1.pdf [file NIHMS315231-supplement-1.pdf]

# **The proteoglycan bikunin has a defined sequence**

Mellisa Ly,<sup>1</sup> Franklin E. Leach III,<sup>2</sup> Tatiana N. Laremore,<sup>1</sup> Toshihiko Toida,<sup>3</sup> I. Jonathan Amster,<sup>2</sup> Robert J. Linhardt,<sup>1,4,5,6</sup>

Departments of <sup>1</sup>Chemistry and Chemical Biology, <sup>4</sup>Chemical and Biological Engineering, <sup>5</sup>Biology, <sup>6</sup>Biomedical Engineering, Center for Biocatalysis and Interdisciplinary Studies, Rensselaer Polytechnic Institute, Troy, NY 12180, USA

<sup>2</sup>University of Georgia, Department of Chemistry, Athens, GA 30602, USA

<sup>3</sup>Graduate School of Pharmaceutical Sciences, Chiba University, 263-8522 Chiba, Japan

## **SUPPLEMENTARY INFORMATION**

## SUPPLEMENTARY RESULTS

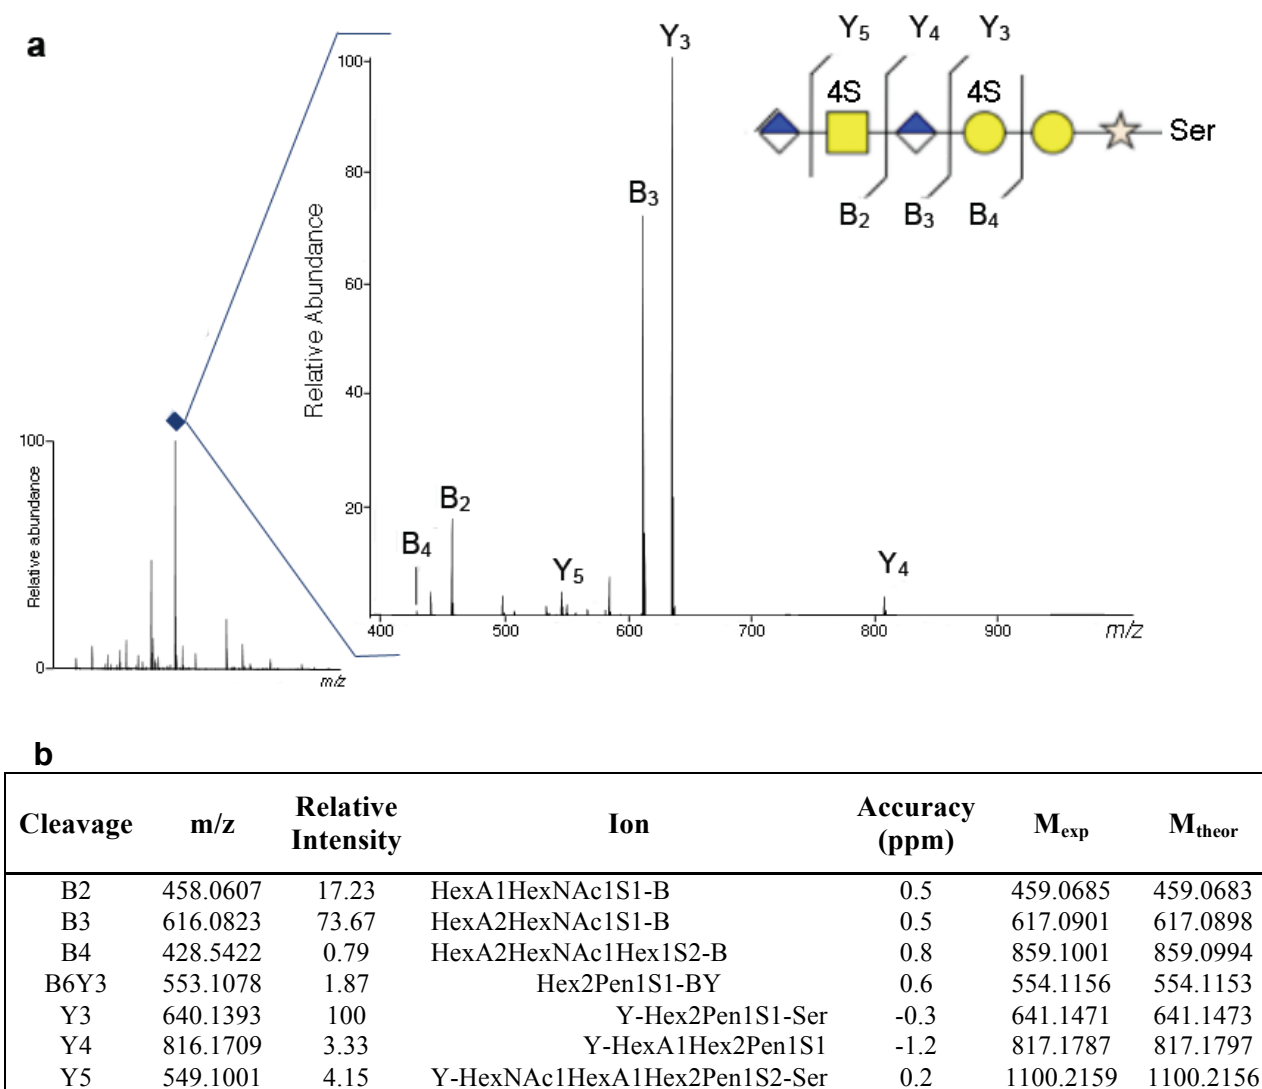

**Supplementary Figure 1.** FTMS analysis of linkage region. **a.** Negative-ion mode FTMS showed the hexasaccharide with single composition  $\Delta$ UA-GalNAc4S-GlcA-Gal4S-Gal-Xyl-Ser was most abundant. CID-FTMS/MS analysis of the hexasaccharide with m/z 628.1118. **b.** Assignment of fragment ions identified include B<sub>2</sub>, B<sub>3</sub>, B<sub>4</sub>, B<sub>6</sub>Y<sub>3</sub>, Y<sub>3</sub>, Y<sub>4</sub>, Y<sub>5</sub> which afforded the uniform composition of the linkage region with a single serine residue on the reducing end. Mass spectra were acquired on the orbitrap FT mass spectrometer.

| $m/z_{\text{Exp}}$ | $z$ | $M_{\text{Exp}}$ | $M_{\text{Theor}}$ | Accuracy (ppm) | Chain      |
|--------------------|-----|------------------|--------------------|----------------|------------|
| 833.6725           | 6   | 5008.0818        | 5008.0784          | -0.68          | dp24-6-Ser |
| 854.1919           | 6   | 5131.1982        | 5131.2009          | 0.53           | dp25-5-Ser |
| 1025.0322          | 5   | 5131.2078        | 5131.2009          | -1.34          | dp25-5-Ser |
| 1041.2226          | 5   | 5211.1520        | 5211.1577          | 1.09           | dp25-6-Ser |
| 867.5181           | 6   | 5211.1554        | 5211.1577          | 0.44           | dp25-6-Ser |
| 743.4437           | 7   | 5211.1605        | 5211.1577          | -0.54          | dp25-6-Ser |
| 883.5303           | 6   | 5307.2286        | 5307.2331          | 0.85           | dp26-5-Ser |
| 896.8565           | 6   | 5387.1858        | 5387.1899          | 0.76           | dp26-6-Ser |
| 687.7814           | 8   | 5510.3136        | 5510.3124          | -0.22          | dp27-5-Ser |
| 611.2495           | 9   | 5510.3157        | 5510.3124          | -0.60          | dp27-5-Ser |
| 786.1802           | 7   | 5510.3160        | 5510.3124          | -0.65          | dp27-5-Ser |
| 917.2105           | 6   | 5510.3176        | 5510.3124          | -0.94          | dp27-5-Ser |
| 1100.8552          | 5   | 5510.3228        | 5510.3124          | -1.89          | dp27-5-Ser |
| 797.6020           | 7   | 5590.2686        | 5590.2692          | 0.11           | dp27-6-Ser |
| 930.7039           | 6   | 5590.2702        | 5590.2692          | -0.18          | dp27-6-Ser |
| 620.1334           | 9   | 5590.2708        | 5590.2692          | -0.29          | dp27-6-Ser |
| 1117.0464          | 5   | 5590.2710        | 5590.2692          | -0.32          | dp27-6-Ser |
| 944.0296           | 6   | 5670.2244        | 5670.2260          | 0.28           | dp27-7-Ser |
| 809.0252           | 7   | 5670.2310        | 5670.2260          | -0.88          | dp27-7-Ser |
| 946.5494           | 6   | 5686.3510        | 5686.3446          | -1.13          | dp28-5-Ser |
| 822.7499           | 7   | 5766.3039        | 5766.3014          | -0.43          | dp28-6-Ser |
| 960.0435           | 6   | 5766.3078        | 5766.3014          | -1.11          | dp28-6-Ser |
| 967.2366           | 6   | 5809.4664        | 5809.4671          | 0.12           | dp29-4-Ser |
| 1161.0852          | 5   | 5809.4572        | 5809.4671          | 1.70           | dp29-4-Ser |
| 1176.6742          | 5   | 5889.4178        | 5889.4239          | 1.04           | dp29-5-Ser |
| 653.2613           | 9   | 5889.4297        | 5889.4239          | -0.98          | dp29-5-Ser |
| 735.1698           | 8   | 5889.4208        | 5889.4239          | 0.53           | dp29-5-Ser |
| 840.3384           | 7   | 5889.4234        | 5889.4239          | 0.08           | dp29-5-Ser |
| 980.5628           | 6   | 5889.4236        | 5889.4239          | 0.05           | dp29-5-Ser |
| 1192.8677          | 5   | 5969.3775        | 5969.3807          | 0.54           | dp29-6-Ser |
| 745.1645           | 8   | 5969.3784        | 5969.3807          | 0.39           | dp29-6-Ser |
| 595.9302           | 10  | 5969.3800        | 5969.3807          | 0.12           | dp29-6-Ser |
| 993.8889           | 6   | 5969.3802        | 5969.3807          | 0.08           | dp29-6-Ser |
| 662.2568           | 9   | 5969.3814        | 5969.3807          | -0.12          | dp29-6-Ser |
| 851.7610           | 7   | 5969.3816        | 5969.3807          | -0.15          | dp29-6-Ser |

**Supplementary Table 1.** FT-ICR MS quadrupole windowing identifications of 47 compositions and their charge states ranging from dp24-6-Ser to dp43-7-Ser and ( $z = 5-12$ ) respectively. Identified monoisotopic peaks for each envelope listed with its experimental mass ( $M_{\text{Exp}}$ ), theoretical mass ( $M_{\text{Theor}}$ ), accuracy in ppm, and component.

| $m/z_{Exp}$ | $z$ | $M_{Exp}$ | $M_{Theor}$ | Accuracy (ppm) | Chain      |
|-------------|-----|-----------|-------------|----------------|------------|
| 1007.2148   | 6   | 6049.3356 | 6049.3375   | 0.31           | dp29-7-Ser |
| 863.1837    | 7   | 6049.3405 | 6049.3375   | -0.50          | dp29-7-Ser |
| 865.4864    | 7   | 6065.4594 | 6065.4561   | -0.54          | dp30-5-Ser |
| 1009.7349   | 6   | 6065.4640 | 6065.4651   | 0.18           | dp30-5-Ser |
| 876.7647    | 7   | 6145.4153 | 6145.4129   | -0.39          | dp30-6-Ser |
| 1023.0605   | 6   | 6145.4176 | 6145.4129   | -0.76          | dp30-6-Ser |
| 1030.4219   | 6   | 6188.5782 | 6188.5786   | 0.06           | dp31-4-Ser |
| 695.4953    | 9   | 6268.5279 | 6268.5354   | 1.20           | dp31-5-Ser |
| 625.8452    | 10  | 6268.5300 | 6268.5354   | 0.86           | dp31-5-Ser |
| 1252.6987   | 5   | 6268.5325 | 6268.5354   | 0.46           | dp31-5-Ser |
| 1043.7479   | 6   | 6268.5342 | 6268.5354   | 0.19           | dp31-5-Ser |
| 894.4976    | 7   | 6268.5378 | 6268.5354   | -0.38          | dp31-5-Ser |
| 782.5596    | 8   | 6268.5392 | 6268.5354   | -0.61          | dp31-5-Ser |
| 633.8409    | 10  | 6348.4870 | 6348.4922   | 0.82           | dp31-6-Ser |
| 792.5534    | 8   | 6348.4896 | 6348.4922   | 0.41           | dp31-6-Ser |
| 1057.0740   | 6   | 6348.4908 | 6348.4922   | 0.22           | dp31-6-Ser |
| 905.9196    | 7   | 6348.4918 | 6348.4922   | 0.06           | dp31-6-Ser |
| 1268.6913   | 5   | 6348.4955 | 6348.4922   | -0.52          | dp31-6-Ser |
| 704.3806    | 9   | 6348.4956 | 6348.4922   | -0.54          | dp31-6-Ser |
| 802.5480    | 8   | 6428.4464 | 6428.4490   | 0.40           | dp31-7-Ser |
| 917.3419    | 7   | 6428.4479 | 6428.4490   | 0.17           | dp31-7-Ser |
| 641.8370    | 10  | 6428.4480 | 6428.4490   | 0.16           | dp31-7-Ser |
| 1070.4003   | 6   | 6428.4486 | 6428.4490   | 0.06           | dp31-7-Ser |
| 715.0547    | 9   | 6444.5625 | 6444.5676   | 0.79           | dp32-5-Ser |
| 919.6443    | 7   | 6444.5647 | 6444.5676   | 0.45           | dp32-5-Ser |
| 1073.0865   | 6   | 6444.5658 | 6444.5676   | 0.28           | dp32-5-Ser |
| 928.7650    | 7   | 6508.4096 | 6508.4058   | -0.58          | dp31-8-Ser |
| 931.0663    | 7   | 6524.5187 | 6524.5244   | 0.87           | dp32-6-Ser |
| 814.5571    | 8   | 6524.5192 | 6524.5244   | 0.80           | dp32-6-Ser |
| 1086.4134   | 6   | 6524.5272 | 6524.5244   | -0.43          | dp32-6-Ser |
| 942.4891    | 7   | 6604.4783 | 6604.4812   | 0.44           | dp32-7-Ser |
| 1099.7388   | 6   | 6604.4796 | 6604.4812   | 0.24           | dp32-7-Ser |
| 824.5524    | 8   | 6604.4816 | 6604.4812   | -0.06          | dp32-7-Ser |
| 1328.5199   | 5   | 6647.6385 | 6647.6469   | 1.26           | dp33-5-Ser |
| 948.6556    | 7   | 6647.6438 | 6647.6469   | 0.47           | dp33-5-Ser |
| 663.7569    | 10  | 6647.6470 | 6647.6469   | -0.02          | dp33-5-Ser |
| 1106.9334   | 6   | 6647.6472 | 6647.6469   | -0.05          | dp33-5-Ser |
| 829.9486    | 8   | 6647.6512 | 6647.6469   | -0.65          | dp33-5-Ser |
| 737.6204    | 9   | 6647.6538 | 6647.6469   | -1.04          | dp33-5-Ser |

Supplementary Table 1. (Continued).

| $m/z_{Exp}$ | $z$ | $M_{Exp}$ | $M_{Theor}$ | Accuracy (ppm) | Chain      |
|-------------|-----|-----------|-------------|----------------|------------|
| 839.9425    | 8   | 6727.6024 | 6727.6037   | 0.19           | dp33-6-Ser |
| 610.5925    | 11  | 6727.6033 | 6727.6037   | 0.06           | dp33-6-Ser |
| 746.5037    | 9   | 6727.6035 | 6727.6037   | 0.03           | dp33-6-Ser |
| 1120.2596   | 6   | 6727.6044 | 6727.6037   | -0.10          | dp33-6-Ser |
| 960.0787    | 7   | 6727.6055 | 6727.6037   | -0.27          | dp33-6-Ser |
| 1344.5134   | 5   | 6727.6060 | 6727.6037   | -0.34          | dp33-6-Ser |
| 671.7529    | 10  | 6727.6070 | 6727.6037   | -0.49          | dp33-6-Ser |
| 971.5004    | 7   | 6807.5574 | 6807.5605   | 0.46           | dp33-7-Ser |
| 1133.5853   | 6   | 6807.5586 | 6807.5605   | 0.28           | dp33-7-Ser |
| 617.8612    | 11  | 6807.5590 | 6807.5605   | 0.22           | dp33-7-Ser |
| 849.9382    | 8   | 6807.5680 | 6807.5605   | -1.10          | dp33-7-Ser |
| 973.8019    | 7   | 6823.6679 | 6823.6791   | 1.64           | dp34-5-Ser |
| 982.9241    | 7   | 6887.5233 | 6887.5173   | -0.87          | dp33-8-Ser |
| 1149.5981   | 6   | 6903.6354 | 6903.6359   | 0.07           | dp34-6-Ser |
| 985.2259    | 7   | 6903.6359 | 6903.6359   | 0.00           | dp34-6-Ser |
| 1162.9233   | 6   | 6983.5866 | 6983.5927   | 0.87           | dp34-7-Ser |
| 996.6481    | 7   | 6983.5913 | 6983.5927   | 0.20           | dp34-7-Ser |
| 871.9420    | 8   | 6983.5984 | 6983.5927   | -0.82          | dp34-7-Ser |
| 701.6668    | 10  | 7026.7460 | 7026.7584   | 1.76           | dp35-5-Ser |
| 637.7879    | 11  | 7026.7527 | 7026.7584   | 0.81           | dp35-5-Ser |
| 779.7425    | 9   | 7026.7527 | 7026.7584   | 0.81           | dp35-5-Ser |
| 877.3371    | 8   | 7026.7592 | 7026.7584   | -0.11          | dp35-5-Ser |
| 1002.8153   | 7   | 7026.7617 | 7026.7584   | -0.47          | dp35-5-Ser |
| 1170.1199   | 6   | 7026.7662 | 7026.7584   | -1.11          | dp35-5-Ser |
| 1014.2371   | 7   | 7106.7143 | 7106.7152   | 0.13           | dp35-6-Ser |
| 709.6640    | 10  | 7106.7180 | 7106.7152   | -0.39          | dp35-6-Ser |
| 1183.4452   | 6   | 7106.7180 | 7106.7152   | -0.39          | dp35-6-Ser |
| 645.0576    | 11  | 7106.7194 | 7106.7152   | -0.59          | dp35-6-Ser |
| 887.3324    | 8   | 7106.7216 | 7106.7152   | -0.90          | dp35-6-Ser |
| 788.6283    | 9   | 7106.7249 | 7106.7152   | -1.36          | dp35-6-Ser |
| 797.3998    | 9   | 7186.6762 | 7186.6720   | -0.58          | dp35-7-Ser |
| 1196.6037   | 6   | 7186.6768 | 7186.6720   | -0.67          | dp35-7-Ser |
| 897.3259    | 8   | 7186.6696 | 7186.6720   | 0.33           | dp35-7-Ser |
| 1025.6595   | 7   | 7186.6711 | 7186.6720   | 0.13           | dp35-7-Ser |
| 652.3268    | 11  | 7186.6806 | 7186.6720   | -1.20          | dp35-7-Ser |

Supplementary Table 1. (Continued).

| $m/z_{\text{Exp}}$ | $z$ | $M_{\text{Exp}}$ | $M_{\text{Theor}}$ | Accuracy (ppm) | Chain      |
|--------------------|-----|------------------|--------------------|----------------|------------|
| 909.2097           | 8   | 7282.7478        | 7282.7474          | -0.05          | dp36-6-Ser |
| 1039.2416          | 7   | 7282.7536        | 7282.7474          | -0.85          | dp36-6-Ser |
| 1212.6172          | 6   | 7282.7578        | 7282.7474          | -1.43          | dp36-6-Ser |
| 1226.1088          | 6   | 7362.6996        | 7362.7042          | 0.62           | dp36-7-Ser |
| 1050.8076          | 7   | 7362.7078        | 7362.7042          | -0.49          | dp36-7-Ser |
| 919.3310           | 8   | 7362.7104        | 7362.7042          | -0.84          | dp36-7-Ser |
| 1233.1369          | 6   | 7405.8760        | 7405.8699          | -0.82          | dp37-5-Ser |
| 672.1623           | 11  | 7405.8789        | 7405.8699          | -1.22          | dp37-5-Ser |
| 622.8109           | 12  | 7485.8244        | 7485.8267          | 0.31           | dp37-6-Ser |
| 1068.3960          | 7   | 7485.8266        | 7485.8267          | 0.01           | dp37-6-Ser |
| 679.5221           | 11  | 7485.8289        | 7485.8267          | -0.29          | dp37-6-Ser |
| 934.7209           | 8   | 7485.8296        | 7485.8267          | -0.39          | dp37-6-Ser |
| 747.5753           | 10  | 7485.8310        | 7485.8267          | -0.57          | dp37-6-Ser |
| 830.7512           | 9   | 7485.8310        | 7485.8267          | -0.57          | dp37-6-Ser |
| 1246.6312          | 6   | 7485.8340        | 7485.8267          | -0.98          | dp37-6-Ser |
| 1079.8179          | 7   | 7565.7799        | 7565.7835          | 0.48           | dp37-7-Ser |
| 944.7151           | 8   | 7565.7832        | 7565.7835          | 0.04           | dp37-7-Ser |
| 686.7907           | 11  | 7565.7835        | 7565.7835          | 0.00           | dp37-7-Ser |
| 956.7238           | 8   | 7661.8528        | 7661.8589          | 0.80           | dp38-6-Ser |
| 1275.9678          | 6   | 7661.8536        | 7661.8589          | 0.69           | dp38-6-Ser |
| 1093.5435          | 7   | 7661.8591        | 7661.8589          | -0.03          | dp38-6-Ser |
| 966.7197           | 8   | 7741.8200        | 7741.8157          | -0.56          | dp38-7-Ser |
| 1110.9875          | 7   | 7784.9749        | 7784.9814          | 0.83           | dp39-5-Ser |
| 981.9833           | 8   | 7864.9366        | 7864.9382          | 0.20           | dp39-6-Ser |
| 713.8952           | 11  | 7864.9408        | 7864.9382          | -0.33          | dp39-6-Ser |
| 1309.8139          | 6   | 7864.9302        | 7864.9382          | 1.02           | dp39-6-Ser |
| 1122.5545          | 7   | 7864.9361        | 7864.9382          | 0.27           | dp39-6-Ser |
| 654.4039           | 12  | 7864.9404        | 7864.9382          | -0.28          | dp39-6-Ser |
| 881.7559           | 9   | 7944.8733        | 7944.8950          | 2.73           | dp39-7-Ser |
| 992.1039           | 8   | 7944.8936        | 7944.8950          | 0.18           | dp39-7-Ser |
| 1133.9771          | 7   | 7944.8943        | 7944.8950          | 0.09           | dp39-7-Ser |
| 1323.1422          | 6   | 7944.9000        | 7944.8950          | -0.63          | dp39-7-Ser |
| 685.9952           | 12  | 8244.0360        | 8244.0497          | 1.66           | dp41-6-Ser |
| 1176.7135          | 7   | 8244.0491        | 8244.0497          | 0.07           | dp41-6-Ser |
| 1029.4986          | 8   | 8244.0512        | 8244.0497          | -0.18          | dp41-6-Ser |
| 1039.4928          | 8   | 8324.0048        | 8324.0065          | 0.20           | dp41-7-Ser |
| 1188.1367          | 7   | 8324.0115        | 8324.0065          | -0.60          | dp41-7-Ser |
| 1242.1497          | 7   | 8703.1103        | 8703.1180          | 0.88           | dp43-7-Ser |
| 1086.8827          | 8   | 8703.1240        | 8703.1180          | -0.69          | dp43-7-Ser |

Supplementary Table 1. (Continued).

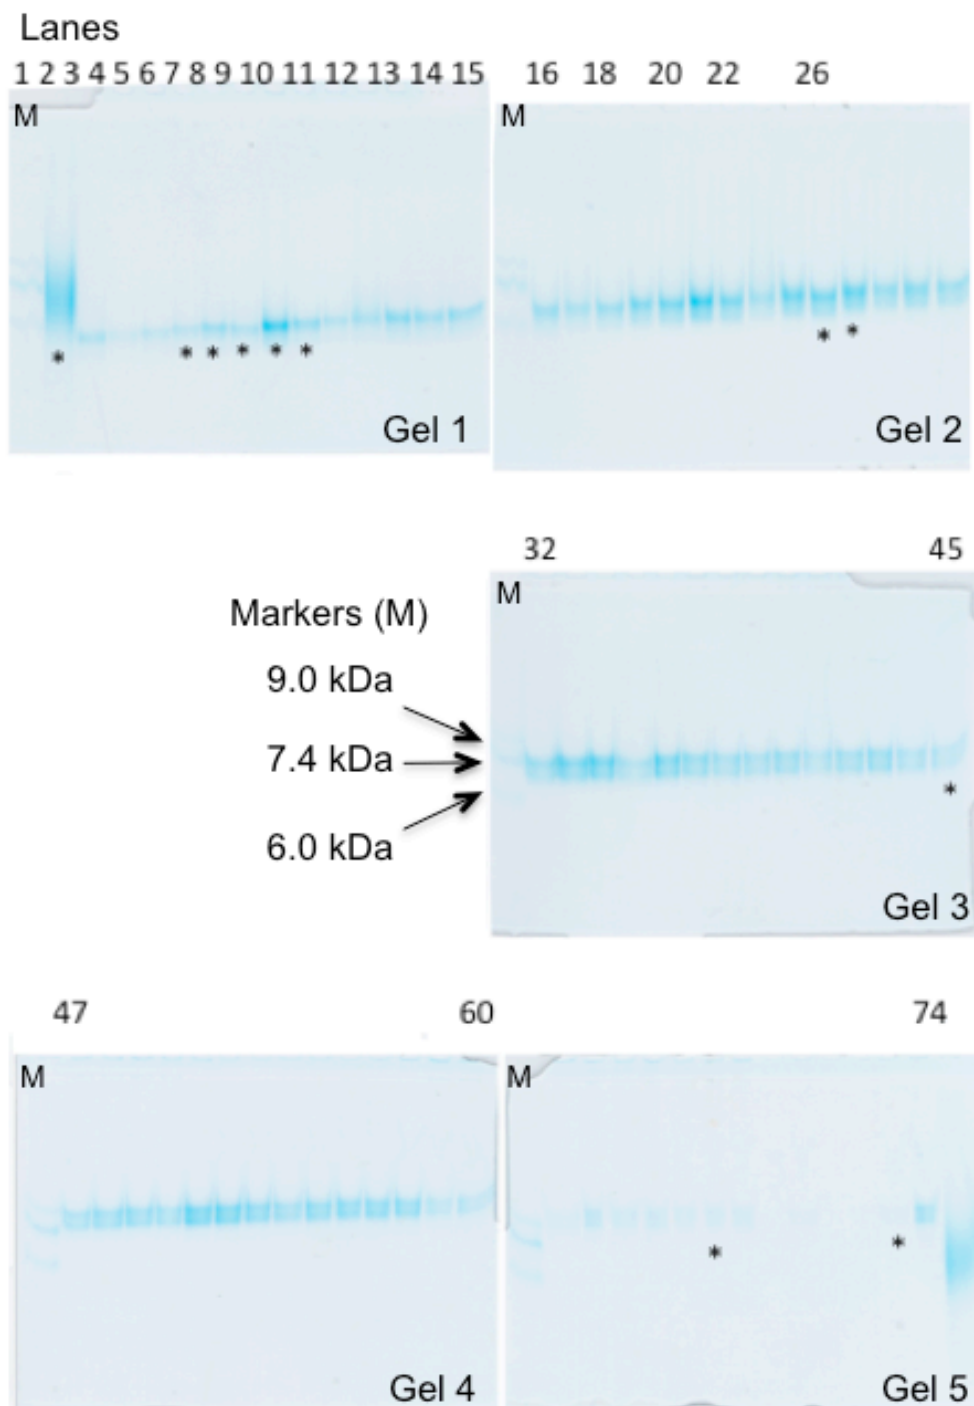

**Supplementary Figure 2.** Analytical PAGE analysis of bikunin pG. 15% PAGE numbered as Gel 1-5 allowed both  $M_N$  and  $M_W$  calculation of bikunin pG and  $M_R$  determination of gel bands. For bikunin pG, Gel 1 used markers, highest abundant compositions from lanes 7, 8, 9, 10, and 11, and Gel 5 used markers and lanes 57, 58, and 60. Starred bands(\*) analyzed by FTMS or FT-ICR MS.

| Gel       | Lane      | Fraction  | M <sub>R</sub> by PAGE | Gel       | Lane       | Fraction   | M <sub>R</sub> by PAGE |             |
|-----------|-----------|-----------|------------------------|-----------|------------|------------|------------------------|-------------|
| 1         | 3         | 50        | 5.37                   | 4         | 47         | 91         | 8.47                   |             |
|           | 4         | 51        | 5.43                   |           | 48         | 92         | 8.57                   |             |
|           | 5         | 52        | 5.55                   |           | 49         | 93         | 8.68                   |             |
|           | 6         | 53        | 5.68                   |           | 50         | 94         | 8.68                   |             |
|           | <b>7</b>  | <b>54</b> | <b>5.74</b>            |           | 51         | 95         | 8.79                   |             |
|           | <b>8</b>  | <b>55</b> | <b>5.80</b>            |           | 52         | 96         | 8.90                   |             |
|           | <b>9</b>  | <b>56</b> | <b>5.87</b>            |           | 53         | 97         | 9.01                   |             |
|           | <b>10</b> | <b>57</b> | <b>5.93</b>            |           | 54         | 98         | 9.01                   |             |
|           | <b>11</b> | <b>58</b> | <b>6.06</b>            |           | 55         | 99         | 9.12                   |             |
|           | 12        | 59        | 6.13                   |           | 56         | 100        | 9.23                   |             |
|           | 13        | 60        | 6.20                   |           | <b>57</b>  | <b>101</b> | <b>9.46</b>            |             |
|           | 14        | 61        | 6.27                   |           | 58         | 102        | 9.58                   |             |
|           | 15        | 62        | 6.34                   |           | 59         | 103        | 9.58                   |             |
|           | 2         | 17        | 63                     |           | 6.41       | <b>60</b>  | <b>104</b>             | <b>9.58</b> |
|           |           | 18        | 64                     |           | 6.48       | 5          | 62                     | 105         |
| 19        |           | 65        | 6.62                   | 63        | 106        |            | 9.29                   |             |
| 20        |           | 66        | 6.69                   | 64        | 107        |            | 9.41                   |             |
| 21        |           | 67        | 6.77                   | 65        | 108        |            | 9.29                   |             |
| 22        |           | 68        | 6.84                   | 66        | 109        |            | 9.29                   |             |
| 23        |           | 69        | 6.92                   | 67        | 110        |            | 9.41                   |             |
| 24        |           | 70        | 7.00                   | 68        | 111        |            | 9.41                   |             |
| 25        |           | 71        | 7.15                   | 69        | 112        |            | 9.41                   |             |
| <b>26</b> |           | <b>72</b> | <b>7.23</b>            | 70        | 113        |            | 9.41                   |             |
| <b>27</b> |           | <b>73</b> | <b>7.31</b>            | 71        | 114        |            | 9.65                   |             |
| 28        |           | 74        | 7.39                   | 72        | 115        |            | 9.65                   |             |
| 29        |           | 75        | 7.47                   | <b>73</b> | <b>116</b> |            | <b>9.65</b>            |             |
| 30        |           | 76        | 7.56                   | 74        | 117        |            | 9.77                   |             |
| 3         |           | 32        | 77                     | 7.39      |            |            |                        |             |
|           | 33        | 78        | 7.47                   |           |            |            |                        |             |
|           | 34        | 79        | 7.56                   |           |            |            |                        |             |
|           | 35        | 80        | 7.64                   |           |            |            |                        |             |
|           | 36        | 81        | 7.64                   |           |            |            |                        |             |
|           | 37        | 82        | 7.73                   |           |            |            |                        |             |
|           | 38        | 83        | 7.81                   |           |            |            |                        |             |
|           | 39        | 84        | 7.81                   |           |            |            |                        |             |
|           | 40        | 85        | 7.81                   |           |            |            |                        |             |
|           | 41        | 86        | 7.81                   |           |            |            |                        |             |
|           | 42        | 87        | 7.90                   |           |            |            |                        |             |
|           | 43        | 88        | 7.99                   |           |            |            |                        |             |
|           | 44        | 89        | 8.07                   |           |            |            |                        |             |
|           | <b>45</b> | <b>90</b> | <b>8.16</b>            |           |            |            |                        |             |

**Supplementary Table 2.** M<sub>R</sub>-values of fractions #50-117, based on molecular mass densitometry analysis against CSA standards. Their respective lane loadings from Supplementary Figure 2 are listed with rows in bold analyzed by FTMS or FT-ICR MS.



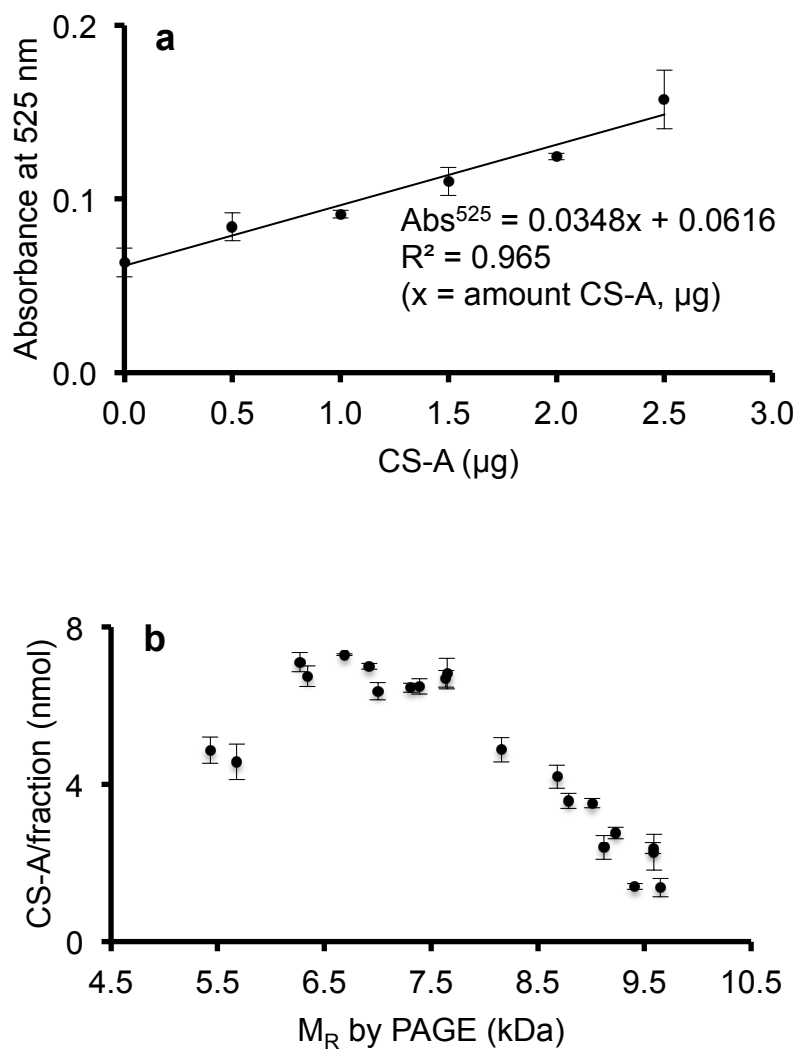

**Supplementary Figure 3.** Microcarbazole assay results quantified GAG based on uronic acid content. **a.** Standard curve using CS-A from bovine trachea. **b.** Quantity of pG (nmol) plotted against their respective  $M_R$  by PAGE. In both cases values plotted are expressed as mean  $\pm$  s.d.

| Sample (n = 3)                     | Absorbance at 525 nm | pG, $\mu\text{g}/\text{fraction}$ | nmol/fraction  |
|------------------------------------|----------------------|-----------------------------------|----------------|
| CS-A Standard 1, 0.0 $\mu\text{g}$ | 0.0635 $\pm$ 0.0084  |                                   |                |
| CS-A Standard 2, 0.5 $\mu\text{g}$ | 0.0841 $\pm$ 0.0081  |                                   |                |
| CS-A Standard 3, 1.0 $\mu\text{g}$ | 0.0913 $\pm$ 0.0022  |                                   |                |
| CS-A Standard 4, 1.5 $\mu\text{g}$ | 0.1100 $\pm$ 0.0081  |                                   |                |
| CS-A Standard 5, 2.0 $\mu\text{g}$ | 0.1250 $\pm$ 0.0019  |                                   |                |
| CS-A Standard 6, 2.5 $\mu\text{g}$ | 0.1507 $\pm$ 0.0170  |                                   |                |
| 5.43 kDa by PAGE, f51              | 0.0692 $\pm$ 0.0048  | 26.4 $\pm$ 1.8                    | 4.9 $\pm$ 0.33 |
| 5.68 kDa by PAGE, f53              | 0.0689 $\pm$ 0.0068  | 26.0 $\pm$ 2.5                    | 4.6 $\pm$ 0.45 |
| 6.27 kDa by PAGE, f61              | 0.0813 $\pm$ 0.0028  | 44.6 $\pm$ 1.5                    | 7.1 $\pm$ 0.24 |
| 6.34 kDa by PAGE, f62              | 0.0801 $\pm$ 0.0031  | 42.8 $\pm$ 1.6                    | 6.7 $\pm$ 0.26 |
| 6.69 kDa by PAGE, f66              | 0.0841 $\pm$ 0.0002  | 48.8 $\pm$ 0.12                   | 7.3 $\pm$ 0.02 |
| 6.92 kDa by PAGE, f69              | 0.0839 $\pm$ 0.0009  | 48.5 $\pm$ 0.50                   | 7.0 $\pm$ 0.07 |
| 7.00 kDa by PAGE, f70              | 0.0813 $\pm$ 0.0027  | 44.6 $\pm$ 1.5                    | 6.4 $\pm$ 0.22 |
| 7.31 kDa by PAGE, f73              | 0.0831 $\pm$ 0.0015  | 47.2 $\pm$ 0.85                   | 6.5 $\pm$ 0.12 |
| 7.39 kDa by PAGE, f74              | 0.0836 $\pm$ 0.0025  | 48.0 $\pm$ 1.4                    | 6.5 $\pm$ 0.19 |
| 7.64 kDa by PAGE, f80              | 0.0856 $\pm$ 0.0027  | 51.1 $\pm$ 1.6                    | 6.7 $\pm$ 0.21 |
| 7.65 kDa by PAGE, f81              | 0.0864 $\pm$ 0.0049  | 52.2 $\pm$ 3.0                    | 6.8 $\pm$ 0.39 |
| 8.16 kDa by PAGE, f90              | 0.0649 $\pm$ 0.0042  | 39.8 $\pm$ 2.6                    | 4.9 $\pm$ 0.32 |
| 8.68 kDa by PAGE, f93              | 0.0637 $\pm$ 0.0045  | 36.4 $\pm$ 2.6                    | 4.2 $\pm$ 0.29 |
| 8.79 kDa by PAGE, f95              | 0.0726 $\pm$ 0.0039  | 31.5 $\pm$ 1.7                    | 3.6 $\pm$ 0.19 |
| 9.01 kDa by PAGE, f97              | 0.0727 $\pm$ 0.0024  | 31.7 $\pm$ 1.0                    | 3.5 $\pm$ 0.11 |
| 9.12 kDa by PAGE, f99              | 0.0662 $\pm$ 0.0083  | 21.9 $\pm$ 2.8                    | 2.4 $\pm$ 0.30 |
| 9.23 kDa by PAGE, f100             | 0.0686 $\pm$ 0.0036  | 25.5 $\pm$ 1.3                    | 2.8 $\pm$ 0.15 |
| 9.58 kDa by PAGE, f102             | 0.0668 $\pm$ 0.0039  | 22.8 $\pm$ 1.3                    | 2.4 $\pm$ 0.14 |
| 9.59 kDa by PAGE, f104             | 0.0661 $\pm$ 0.0132  | 21.8 $\pm$ 4.4                    | 2.3 $\pm$ 0.45 |
| 9.41 kDa by PAGE, f110             | 0.0604 $\pm$ 0.0032  | 13.2 $\pm$ 0.71                   | 1.4 $\pm$ 0.07 |
| 9.65 kDa by PAGE, f116             | 0.0604 $\pm$ 0.0103  | 13.3 $\pm$ 2.3                    | 1.4 $\pm$ 0.23 |

**Supplementary Table 3.** Carbazole assay results of various fractions showing absorbance,  $\mu\text{g}/\text{fraction}$ , and nmol bikunin pG/fraction as listed (n=3 in all cases, with data expressed as mean  $\pm$  s.d.).

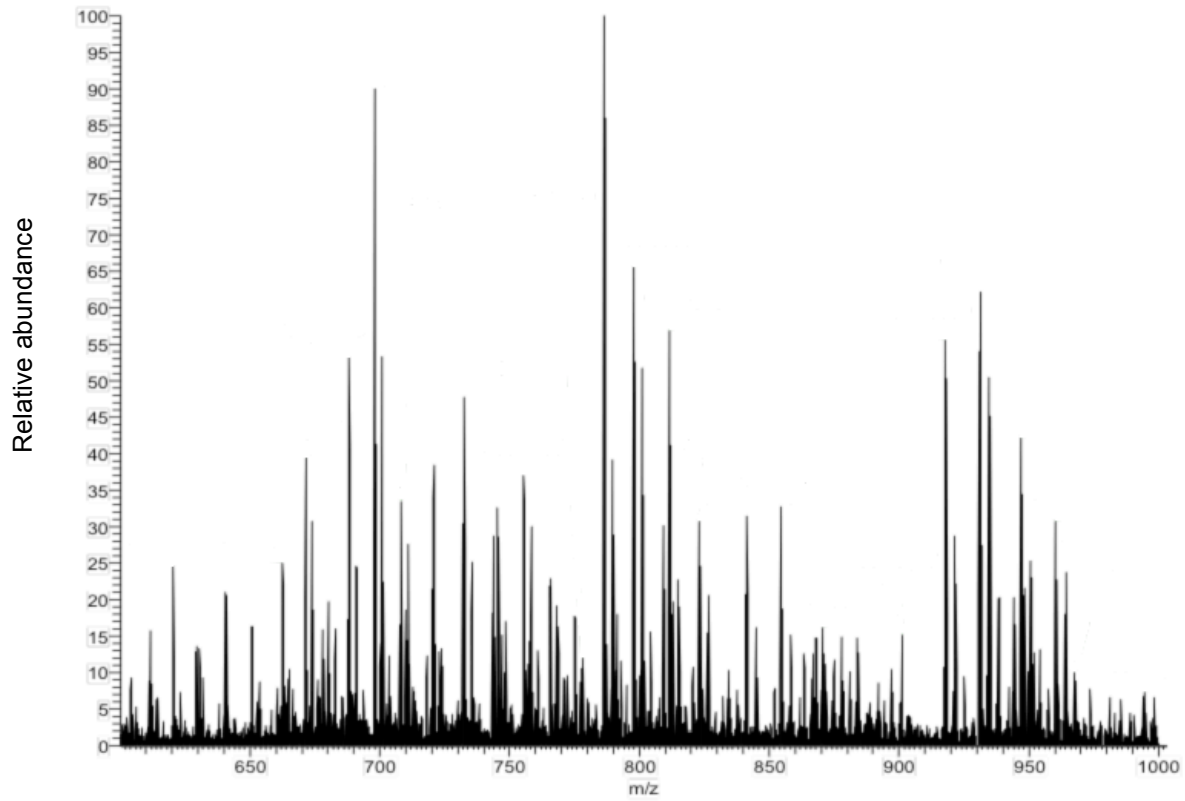

**Supplementary Figure 4.** FTMS of fraction 5.74 kDa (by PAGE) corresponding to 20 composition identifications listed in Supplementary Table 4.

| <i>m/z</i> | Intensity | <i>z</i> | $M_{Exp}$ | $M_{Theor}$ | Accuracy (ppm) | Chain           |
|------------|-----------|----------|-----------|-------------|----------------|-----------------|
| 791.0083   | 7.89E+03  | 6        | 4752.0968 | 4752.0910   | 1.2            | dp23-5-Ser      |
| 720.5985   | 2.91E+04  | 7        | 5051.2443 | 5051.2525   | -1.6           | dp25-4-Ser      |
| 840.8673   | 3.15E+04  | 6        | 5051.2508 | 5051.2525   | -0.3           | dp25-4-Ser      |
| 732.0211   | 2.79E+04  | 7        | 5131.2025 | 5131.2025   | 0.0            | dp25-5-Ser      |
| 854.1933   | 1.76E+04  | 6        | 5131.2068 | 5131.2025   | 0.8            | dp25-5-Ser      |
| 640.3933   | 1.57E+04  | 8        | 5131.2090 | 5131.2025   | 1.3            | dp25-5-Ser      |
| 857.8574   | 1.06E+04  | 6        | 5153.1914 | 5153.1845   | 1.3            | dp25-5-Ser + Na |
| 735.1638   | 1.27E+04  | 7        | 5153.2014 | 5153.1845   | 3.3            | dp25-5-Ser + Na |
| 743.4441   | 1.41E+04  | 7        | 5211.1635 | 5211.1525   | 2.1            | dp25-6-Ser      |
| 660.5115   | 7.05E+03  | 8        | 5292.1546 | 5292.1103   | 8.4            | dp25-7-Ser      |
| 870.2047   | 1.49E+04  | 6        | 5227.2752 | 5227.2846   | -1.8           | dp26-4-Ser      |
| 883.5289   | 1.17E+04  | 6        | 5307.2204 | 5307.2346   | -2.7           | dp26-5-Ser      |
| 757.1675   | 9.94E+03  | 7        | 5307.2273 | 5307.2346   | -1.4           | dp26-5-Ser      |
| 897.0251   | 1.04E+04  | 6        | 5388.1976 | 5388.1924   | 1.0            | dp26-6-Ser      |
| 677.7837   | 9.57E+03  | 8        | 5430.3322 | 5430.3640   | -5.9           | dp27-4-Ser      |
| 774.7591   | 9.49E+03  | 7        | 5430.3685 | 5430.3640   | 0.8            | dp27-4-Ser      |
| 611.2465   | 1.64E+04  | 9        | 5510.2889 | 5510.3140   | -4.6           | dp27-5-Ser      |
| 917.3785   | 2.11E+04  | 6        | 5510.3180 | 5510.3140   | 0.7            | dp27-5-Ser      |
| 786.1808   | 6.18E+04  | 7        | 5510.3204 | 5510.3140   | 1.2            | dp27-5-Ser      |
| 687.7824   | 3.41E+04  | 8        | 5510.3218 | 5510.3140   | 1.4            | dp27-5-Ser      |
| 620.1336   | 1.20E+04  | 9        | 5590.2728 | 5590.2640   | 1.6            | dp27-6-Ser      |
| 697.7768   | 5.28E+04  | 8        | 5590.2770 | 5590.2640   | 2.3            | dp27-6-Ser      |
| 930.7057   | 4.03E+04  | 6        | 5590.2812 | 5590.2640   | 3.1            | dp27-6-Ser      |
| 797.6038   | 4.20E+04  | 7        | 5590.2814 | 5590.2640   | 3.1            | dp27-6-Ser      |
| 707.7708   | 8.42E+03  | 8        | 5670.2290 | 5670.2140   | 2.6            | dp27-7-Ser      |
| 629.0177   | 1.00E+04  | 9        | 5670.2297 | 5670.2140   | 2.8            | dp27-7-Ser      |
| 799.9031   | 1.13E+04  | 7        | 5606.3765 | 5606.3961   | -3.5           | dp28-4-Ser      |
| 946.7166   | 1.99E+04  | 6        | 5686.3466 | 5686.3461   | 0.1            | dp28-5-Ser      |
| 709.7858   | 1.84E+04  | 8        | 5686.3490 | 5686.3461   | 0.5            | dp28-5-Ser      |
| 811.3279   | 3.47E+04  | 7        | 5686.3501 | 5686.3461   | 0.7            | dp28-5-Ser      |
| 822.7477   | 1.15E+04  | 7        | 5766.2887 | 5766.2961   | -1.3           | dp28-6-Ser      |
| 960.0419   | 1.38E+04  | 6        | 5766.2984 | 5766.2961   | 0.4            | dp28-6-Ser      |
| 719.7811   | 1.02E+04  | 8        | 5766.3114 | 5766.2961   | 2.7            | dp28-6-Ser      |
| 834.3162   | 1.16E+04  | 7        | 5847.2682 | 5847.2539   | 2.4            | dp28-7-Ser      |
| 729.9008   | 6.86E+03  | 8        | 5847.2690 | 5847.2539   | 2.6            | dp28-7-Ser      |
| 653.3691   | 9.04E+03  | 9        | 5889.3923 | 5889.4255   | -5.6           | dp29-5-Ser      |
| 662.2541   | 1.12E+04  | 9        | 5969.3573 | 5969.3755   | -3.0           | dp29-6-Ser      |
| 745.1632   | 1.06E+04  | 8        | 5969.3682 | 5969.3755   | -1.2           | dp29-6-Ser      |
| 671.1390   | 9.41E+03  | 9        | 6049.3214 | 6049.3255   | -0.7           | dp29-7-Ser      |
| 863.1846   | 9.76E+03  | 7        | 6049.3470 | 6049.3255   | 3.5            | dp29-7-Ser      |
| 680.0267   | 1.71E+04  | 9        | 6129.3107 | 6129.2800   | 5.0            | dp29-8-Ser      |

**Supplementary Table 4.** Accurate mass measurements for 20 compositions identified by FTMS of 5.74 kDa (by PAGE). Data acquired on the orbitrap FT mass spectrometer.

| $m/z$     | $z$ | $M_{\text{Exp}}$ | $M_{\text{Theor}}$ | Accuracy (ppm) | Chain      |
|-----------|-----|------------------|--------------------|----------------|------------|
| 777.6793  | 6   | 4672.1226        | 4672.1326          | 2.1            | dp23-4-Ser |
| 666.4402  | 7   | 4672.1360        | 4672.1326          | -0.7           | dp23-4-Ser |
| 583.0099  | 8   | 4672.1416        | 4672.1326          | -1.9           | dp23-4-Ser |
| 593.0024  | 8   | 4752.0816        | 4752.0894          | 1.6            | dp23-5-Ser |
| 691.5894  | 7   | 4848.1804        | 4848.1648          | -3.2           | dp24-4-Ser |
| 720.5973  | 7   | 5051.2357        | 5051.2441          | 1.7            | dp25-4-Ser |
| 630.2728  | 8   | 5051.2526        | 5051.2441          | -1.7           | dp25-4-Ser |
| 840.8694  | 6   | 5051.2632        | 5051.2441          | -3.8           | dp25-4-Ser |
| 1009.0482 | 5   | 5051.2878        | 5051.2441          | -8.7           | dp25-4-Ser |
| 640.3914  | 8   | 5131.1936        | 5131.2009          | 1.4            | dp25-5-Ser |
| 854.1915  | 6   | 5131.1958        | 5131.2009          | 1.0            | dp25-5-Ser |
| 569.1256  | 9   | 5131.2006        | 5131.2009          | 0.1            | dp25-5-Ser |
| 732.0230  | 7   | 5131.2156        | 5131.2009          | -2.9           | dp25-5-Ser |
| 743.4434  | 7   | 5211.1584        | 5211.1577          | -0.1           | dp25-6-Ser |
| 578.0101  | 9   | 5211.1611        | 5211.1577          | -0.7           | dp25-6-Ser |
| 867.5197  | 6   | 5211.1650        | 5211.1577          | -1.4           | dp25-6-Ser |
| 652.4009  | 8   | 5227.2696        | 5227.2763          | 1.3            | dp26-4-Ser |
| 579.8003  | 9   | 5227.2729        | 5227.2763          | 0.7            | dp26-4-Ser |
| 870.2049  | 6   | 5227.2762        | 5227.2763          | 0.0            | dp26-4-Ser |
| 745.7469  | 7   | 5227.2829        | 5227.2763          | -1.3           | dp26-4-Ser |
| 757.1680  | 7   | 5307.2306        | 5307.2331          | 0.5            | dp26-5-Ser |
| 662.3950  | 8   | 5307.2224        | 5307.2331          | 2.0            | dp26-5-Ser |
| 588.6839  | 9   | 5307.2253        | 5307.2331          | 1.5            | dp26-5-Ser |
| 883.5362  | 6   | 5307.2640        | 5307.2331          | -5.8           | dp26-5-Ser |
| 903.8808  | 6   | 5430.3394        | 5430.3556          | 3.0            | dp27-4-Ser |
| 774.7557  | 7   | 5430.3445        | 5430.3556          | 2.0            | dp27-4-Ser |
| 602.2532  | 9   | 5430.3568        | 5430.3556          | -0.2           | dp27-4-Ser |
| 677.7872  | 8   | 5430.3600        | 5430.3556          | -0.8           | dp27-4-Ser |
| 687.7809  | 8   | 5510.3096        | 5510.3124          | 0.5            | dp27-5-Ser |
| 786.1798  | 7   | 5510.3132        | 5510.3124          | -0.1           | dp27-5-Ser |
| 917.3778  | 6   | 5510.3136        | 5510.3124          | -0.2           | dp27-5-Ser |
| 611.2495  | 9   | 5510.3157        | 5510.3124          | -0.6           | dp27-5-Ser |
| 550.0249  | 10  | 5510.3270        | 5510.3124          | -2.6           | dp27-5-Ser |
| 697.7751  | 8   | 5590.2632        | 5590.2692          | 1.1            | dp27-6-Ser |
| 620.1319  | 9   | 5590.2573        | 5590.2692          | 2.1            | dp27-6-Ser |
| 930.5360  | 6   | 5590.2706        | 5590.2692          | -0.3           | dp27-6-Ser |
| 557.9190  | 10  | 5590.2758        | 5590.2692          | -1.2           | dp27-6-Ser |
| 797.6041  | 7   | 5590.2833        | 5590.2692          | -2.5           | dp27-6-Ser |
| 799.9029  | 7   | 5606.3749        | 5606.3878          | 2.3            | dp28-4-Ser |
| 621.9252  | 9   | 5606.3970        | 5606.3878          | -1.6           | dp28-4-Ser |
| 699.6670  | 8   | 5606.4062        | 5606.3878          | -3.3           | dp28-4-Ser |
| 933.2293  | 6   | 5606.4304        | 5606.3878          | -7.6           | dp28-4-Ser |

**Supplementary Table 5.** Accurate mass measurements for 18 compositions identified by FT-ICR MS of 5.80 kDa (by PAGE). Mass spectrum was acquired on the Bruker Bruker FT-ICR mass spectrometer. This table corresponds to identifications in spectra from Figure 3a.

| $m/z$    | $z$ | $M_{Exp}$ | $M_{Theor}$ | Accuracy (ppm) | Chain      |
|----------|-----|-----------|-------------|----------------|------------|
| 811.3261 | 7   | 5686.3373 | 5686.3446   | 1.3            | dp28-5-Ser |
| 709.7839 | 8   | 5686.3336 | 5686.3446   | 1.9            | dp28-5-Ser |
| 567.6270 | 10  | 5686.3480 | 5686.3446   | -0.6           | dp28-5-Ser |
| 630.8087 | 9   | 5686.3485 | 5686.3446   | -0.7           | dp28-5-Ser |
| 946.7230 | 6   | 5686.3848 | 5686.3446   | -7.1           | dp28-5-Ser |
| 639.6926 | 9   | 5766.3036 | 5766.3014   | -0.4           | dp28-6-Ser |
| 575.6236 | 10  | 5766.3140 | 5766.3014   | -2.2           | dp28-6-Ser |
| 719.7824 | 8   | 5766.3216 | 5766.3014   | -3.5           | dp28-6-Ser |
| 587.9346 | 10  | 5889.4240 | 5889.4239   | 0.0            | dp29-5-Ser |
| 662.2553 | 9   | 5969.3679 | 5969.3807   | 2.1            | dp29-6-Ser |
| 851.7596 | 7   | 5969.3718 | 5969.3807   | 1.5            | dp29-6-Ser |
| 541.6634 | 11  | 5969.3832 | 5969.3807   | -0.4           | dp29-6-Ser |
| 595.9308 | 10  | 5969.3860 | 5969.3807   | -0.9           | dp29-6-Ser |
| 745.1672 | 8   | 5969.4000 | 5969.3807   | -3.2           | dp29-6-Ser |
| 603.9257 | 10  | 6049.3350 | 6049.3375   | 0.4            | dp29-7-Ser |
| 548.9323 | 11  | 6049.3411 | 6049.3375   | -0.6           | dp29-7-Ser |
| 671.1414 | 9   | 6049.3428 | 6049.3375   | -0.9           | dp29-7-Ser |
| 863.1855 | 7   | 6049.3531 | 6049.3375   | -2.6           | dp29-7-Ser |
| 755.1622 | 8   | 6049.3600 | 6049.3375   | -3.7           | dp29-7-Ser |
| 767.1672 | 8   | 6145.4000 | 6145.4129   | 2.1            | dp30-6-Ser |
| 876.9111 | 7   | 6145.4323 | 6145.4129   | -3.2           | dp30-6-Ser |

**Supplementary Table 5.** (Continued).

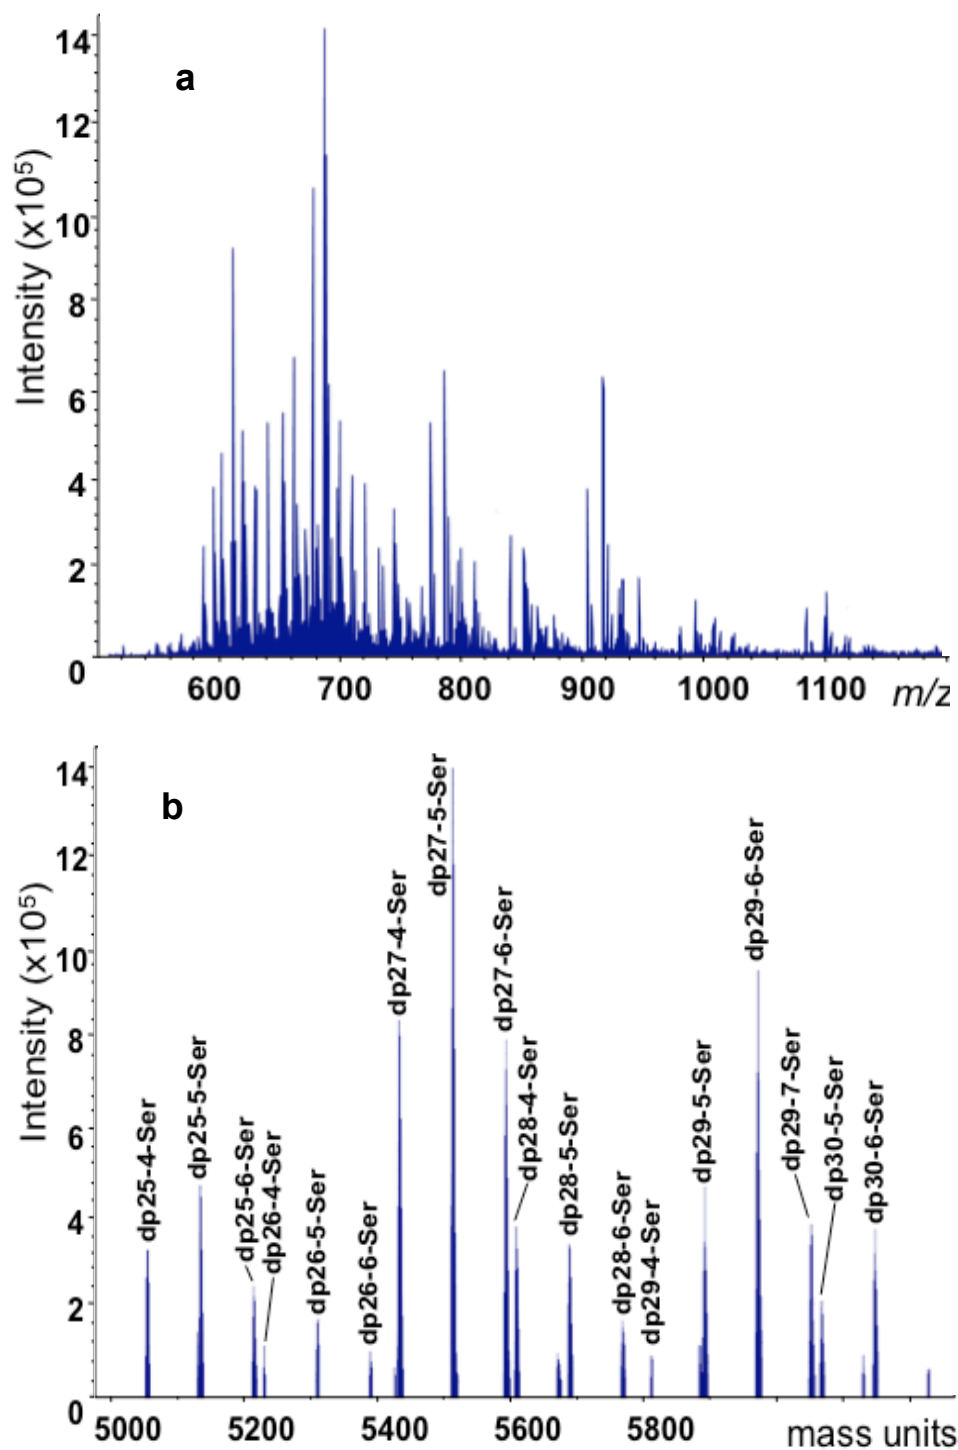

**Supplementary Figure 5.** FTMS of fraction 5.87 kDa (by PAGE) corresponding to 20 composition identifications listed in Supplementary Table 6. **a.** FT mass spectrum, **b.** deconvoluted spectrum.

| $m/z$    | $z$ | $M_{\text{Exp}}$ | $M_{\text{Theor}}$ | Accuracy (ppm) | Chain    |
|----------|-----|------------------|--------------------|----------------|----------|
| 666.4416 | 7   | 4672.1460        | 4672.1400          | 1.3            | dp23-4-S |
| 840.8677 | 6   | 5051.2532        | 5051.2500          | 0.6            | dp25-4-S |
| 720.5996 | 7   | 5051.2520        | 5051.2500          | 0.4            | dp25-4-S |
| 630.3991 | 8   | 5051.2554        | 5051.2500          | 1.1            | dp25-4-S |
| 854.1970 | 6   | 5131.2290        | 5131.2000          | 5.6            | dp25-5-S |
| 732.0216 | 7   | 5131.2060        | 5131.2000          | 1.2            | dp25-5-S |
| 640.3935 | 8   | 5131.2106        | 5131.2000          | 2.1            | dp25-5-S |
| 650.3894 | 8   | 5211.1778        | 5211.1500          | 5.3            | dp25-6-S |
| 652.5281 | 8   | 5228.2874        | 5228.2924          | -1.0           | dp26-4-S |
| 662.3968 | 8   | 5307.2370        | 5307.2346          | 0.5            | dp26-5-S |
| 768.7354 | 7   | 5388.2026        | 5388.1924          | 1.9            | dp26-6-S |
| 672.5172 | 8   | 5388.2002        | 5388.1924          | 1.4            | dp26-6-S |
| 904.0526 | 6   | 5430.3626        | 5430.3600          | 0.5            | dp27-4-S |
| 774.7586 | 7   | 5430.3650        | 5430.3600          | 0.9            | dp27-4-S |
| 677.7879 | 8   | 5430.3658        | 5430.3600          | 1.1            | dp27-4-S |
| 602.3661 | 9   | 5430.3653        | 5430.3600          | 1.0            | dp27-4-S |
| 917.3785 | 6   | 5510.3180        | 5510.3100          | 1.4            | dp27-5-S |
| 786.1809 | 7   | 5510.3211        | 5510.3100          | 2.0            | dp27-5-S |
| 687.7826 | 8   | 5510.3234        | 5510.3100          | 2.4            | dp27-5-S |
| 611.2500 | 9   | 5510.3204        | 5510.3100          | 1.9            | dp27-5-S |
| 930.7049 | 6   | 5590.2764        | 5590.2600          | 2.9            | dp27-6-S |
| 797.6043 | 7   | 5590.2849        | 5590.2600          | 4.4            | dp27-6-S |
| 697.7784 | 8   | 5590.2898        | 5590.2600          | 5.3            | dp27-6-S |
| 620.1358 | 9   | 5590.2926        | 5590.2600          | 5.8            | dp27-6-S |
| 699.7916 | 8   | 5606.3954        | 5606.3961          | -0.1           | dp28-4-S |
| 621.9257 | 9   | 5606.4017        | 5606.3961          | 1.0            | dp28-4-S |
| 811.3285 | 7   | 5686.3543        | 5686.3461          | 1.4            | dp28-5-S |
| 709.7859 | 8   | 5686.3498        | 5686.3461          | 0.7            | dp28-5-S |
| 946.8843 | 6   | 5687.3528        | 5687.3539          | -0.2           | dp28-5-S |
| 719.7803 | 8   | 5766.3050        | 5766.2961          | 1.5            | dp28-6-S |
| 822.8946 | 7   | 5767.3170        | 5767.3039          | 2.3            | dp28-6-S |
| 639.8057 | 9   | 5767.3217        | 5767.3039          | 3.1            | dp28-6-S |
| 644.5976 | 9   | 5810.4488        | 5810.4833          | -5.9           | dp29-4-S |
| 735.1710 | 8   | 5889.4306        | 5889.4300          | 0.1            | dp29-5-S |
| 653.3737 | 9   | 5889.4337        | 5889.4300          | 0.6            | dp29-5-S |
| 588.1350 | 10  | 5891.4283        | 5891.4457          | -3.0           | dp29-5-S |

**Supplementary Table 6.** Accurate mass measurements for 20 compositions identified by FTMS of 5.87 kDa (by PAGE). Mass spectrum was acquired on the orbitrap FT mass spectrometer.



| $m/z$    | $z$ | $M_{\text{Exp}}$ | $M_{\text{Theor}}$ | Accuracy (ppm) | Chain    |
|----------|-----|------------------|--------------------|----------------|----------|
| 851.7626 | 7   | 5969.3930        | 5969.3800          | 2.2            | dp29-6-S |
| 745.1654 | 8   | 5969.3858        | 5969.3800          | 1.0            | dp29-6-S |
| 662.2586 | 9   | 5969.3978        | 5969.3800          | 3.0            | dp29-6-S |
| 596.0324 | 10  | 5970.4023        | 5970.3878          | 2.4            | dp29-6-S |
| 671.1434 | 9   | 6049.3610        | 6049.3255          | 5.9            | dp29-7-S |
| 604.1288 | 10  | 6051.3663        | 6051.3457          | 3.4            | dp29-7-S |
| 672.9308 | 9   | 6065.4476        | 6065.4576          | -1.6           | dp30-5-S |
| 865.6283 | 7   | 6066.4529        | 6066.4654          | -2.1           | dp30-5-S |
| 681.8154 | 9   | 6145.4090        | 6145.4076          | 0.2            | dp30-6-S |
| 877.0534 | 7   | 6146.4286        | 6146.4154          | 2.1            | dp30-6-S |
| 767.2950 | 8   | 6146.4226        | 6146.4154          | 1.2            | dp30-6-S |
| 613.7356 | 10  | 6147.4343        | 6147.4232          | 1.8            | dp30-6-S |
| 690.9246 | 9   | 6227.3918        | 6227.3732          | 3.0            | dp30-7-S |

**Supplementary Table 6.** (Continued).

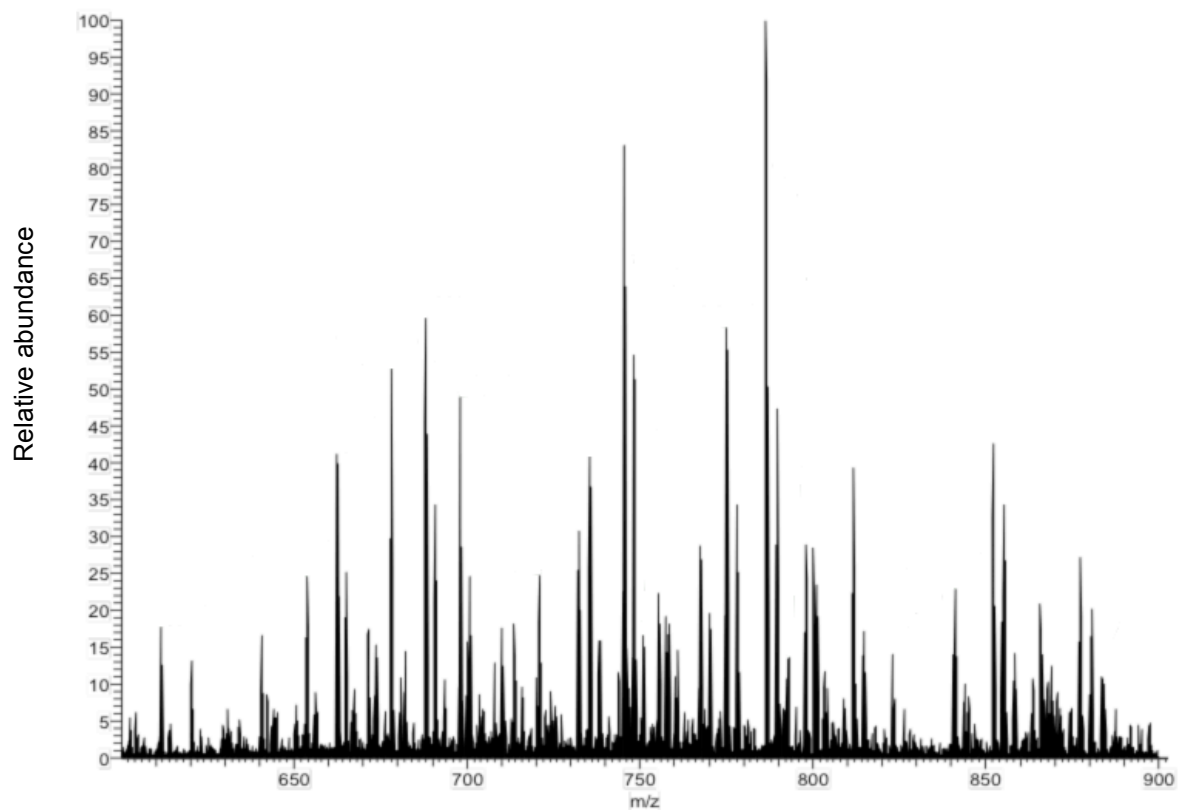

**Supplementary Figure 6.** FTMS of fraction 5.93 kDa (by PAGE) corresponding to 25 composition identifications listed in Supplementary Table 7.

| $m/z$    | $z$ | $M_{\text{Exp}}$ | $M_{\text{Theor}}$ | Accuracy (ppm) | Chain       |
|----------|-----|------------------|--------------------|----------------|-------------|
| 666.4411 | 7   | 4672.1425        | 4672.1410          | 0.3            | dp23-4-Ser  |
| 807.1886 | 6   | 4849.1786        | 4849.1809          | -0.5           | dp24-4-Ser  |
| 840.8679 | 6   | 5051.2544        | 5051.2525          | 0.4            | dp25-4-Ser  |
| 720.5993 | 7   | 5051.2499        | 5051.2525          | -0.5           | dp25-4-Ser  |
| 630.3980 | 8   | 5051.2466        | 5051.2525          | -1.2           | dp25-4-Ser  |
| 732.0219 | 7   | 5131.2081        | 5131.2025          | 1.1            | dp25-5-Ser  |
| 640.3931 | 8   | 5131.2074        | 5131.2025          | 1.0            | dp25-5-Ser  |
| 650.3883 | 8   | 5211.1690        | 5211.1525          | 3.2            | dp25-6-Ser  |
| 867.6880 | 6   | 5212.1750        | 5212.1603          | 2.8            | dp25-6-Ser  |
| 743.5873 | 7   | 5212.1659        | 5212.1603          | 1.1            | dp25-6-Ser  |
| 870.2041 | 6   | 5227.2716        | 5227.2846          | -2.5           | dp26-4-Ser  |
| 883.5306 | 6   | 5307.2306        | 5307.2346          | -0.8           | dp26-5-Ser  |
| 757.1715 | 7   | 5307.2553        | 5307.2346          | 3.9            | dp26-5-Ser  |
| 897.0262 | 6   | 5388.2042        | 5388.1924          | 2.2            | dp26-6-Ser  |
| 768.7359 | 7   | 5388.2061        | 5388.1924          | 2.5            | dp26-6-Ser  |
| 774.7577 | 7   | 5430.3587        | 5430.3640          | -1.0           | dp27-4-Ser  |
| 677.7879 | 8   | 5430.3658        | 5430.3640          | 0.3            | dp27-4-Ser  |
| 602.4741 | 9   | 5431.3373        | 5431.3718          | -6.4           | dp27-4-Ser  |
| 786.1808 | 7   | 5510.3204        | 5510.3140          | 1.2            | dp27-5-Ser  |
| 687.7824 | 8   | 5510.3218        | 5510.3140          | 1.4            | dp27-5-Ser  |
| 611.2495 | 9   | 5510.3159        | 5510.3140          | 0.3            | dp27-5-Ser  |
| 797.6035 | 7   | 5590.2793        | 5590.2640          | 2.7            | dp27-6-Ser  |
| 697.7771 | 8   | 5590.2794        | 5590.2640          | 2.8            | dp27-6-Ser  |
| 620.2460 | 9   | 5591.2844        | 5591.2718          | 2.3            | dp27-6-Ser  |
| 629.0187 | 9   | 5670.2387        | 5670.2140          | 4.4            | dp27-7-Ser  |
| 707.8967 | 8   | 5671.2362        | 5671.2218          | 2.5            | dp27-7-Ser  |
| 822.8938 | 7   | 5767.3114        | 5767.3039          | 1.3            | dp28--6-Ser |
| 719.9053 | 8   | 5767.3050        | 5767.3039          | 0.2            | dp28--6-Ser |
| 799.9049 | 7   | 5606.3891        | 5606.3961          | -1.3           | dp28-4-Ser  |
| 699.7916 | 8   | 5606.3954        | 5606.3961          | -0.1           | dp28-4-Ser  |
| 811.3275 | 7   | 5686.3473        | 5686.3461          | 0.2            | dp28-5-Ser  |
| 709.7854 | 8   | 5686.3458        | 5686.3461          | -0.1           | dp28-5-Ser  |
| 644.5973 | 9   | 5810.4461        | 5810.4833          | -6.4           | dp29-4-Ser  |
| 735.1656 | 8   | 5889.3874        | 5889.4255          | -6.5           | dp29-5-Ser  |
| 653.3739 | 9   | 5889.4355        | 5889.4255          | 1.7            | dp29-5-Ser  |
| 840.4821 | 7   | 5890.4295        | 5890.4333          | -0.7           | dp29-5-Ser  |

**Supplementary Table 7.** Accurate mass measurements for 25 compositions identified by FTMS of 5.93 kDa (by PAGE). Mass spectrum was acquired on the orbitrap FT mass spectrometer.

| $m/z$    | $z$ | $M_{Exp}$ | $M_{Theor}$ | Accuracy (ppm) | Chain      |
|----------|-----|-----------|-------------|----------------|------------|
| 745.1664 | 8   | 5969.3938 | 5969.3755   | 3.1            | dp29-6-Ser |
| 662.2574 | 9   | 5969.3870 | 5969.3755   | 1.9            | dp29-6-Ser |
| 755.1579 | 8   | 6049.3258 | 6049.3255   | 0.0            | dp29-7-Ser |
| 671.1436 | 9   | 6049.3628 | 6049.3255   | 6.2            | dp29-7-Ser |
| 603.9272 | 10  | 6049.3503 | 6049.3255   | 4.1            | dp29-7-Ser |
| 747.3000 | 8   | 5986.4626 | 5986.5154   | -8.8           | dp30-4-Ser |
| 865.4876 | 7   | 6065.4680 | 6065.4576   | 1.7            | dp30-5-Ser |
| 757.3013 | 8   | 6066.4730 | 6066.4654   | 1.3            | dp30-5-Ser |
| 673.0438 | 9   | 6066.4646 | 6066.4654   | -0.1           | dp30-5-Ser |
| 876.9091 | 7   | 6145.4185 | 6145.4076   | 1.8            | dp30-6-Ser |
| 767.1702 | 8   | 6145.4242 | 6145.4076   | 2.7            | dp30-6-Ser |
| 681.8166 | 9   | 6145.4198 | 6145.4076   | 2.0            | dp30-6-Ser |
| 888.6191 | 7   | 6227.3885 | 6227.3732   | 2.4            | dp30-7-Ser |
| 704.4916 | 9   | 6349.4948 | 6349.4948   | 0.0            | dp31-6-Ser |
| 633.9401 | 10  | 6349.4793 | 6349.4948   | -2.5           | dp31-6-Ser |
| 713.2660 | 9   | 6428.4644 | 6428.4370   | 4.3            | dp31-7-Ser |
| 802.6738 | 8   | 6429.4530 | 6429.4448   | 1.3            | dp31-7-Ser |
| 641.9377 | 10  | 6429.4553 | 6429.4448   | 1.6            | dp31-7-Ser |

Supplementary Table 7. (Continued).

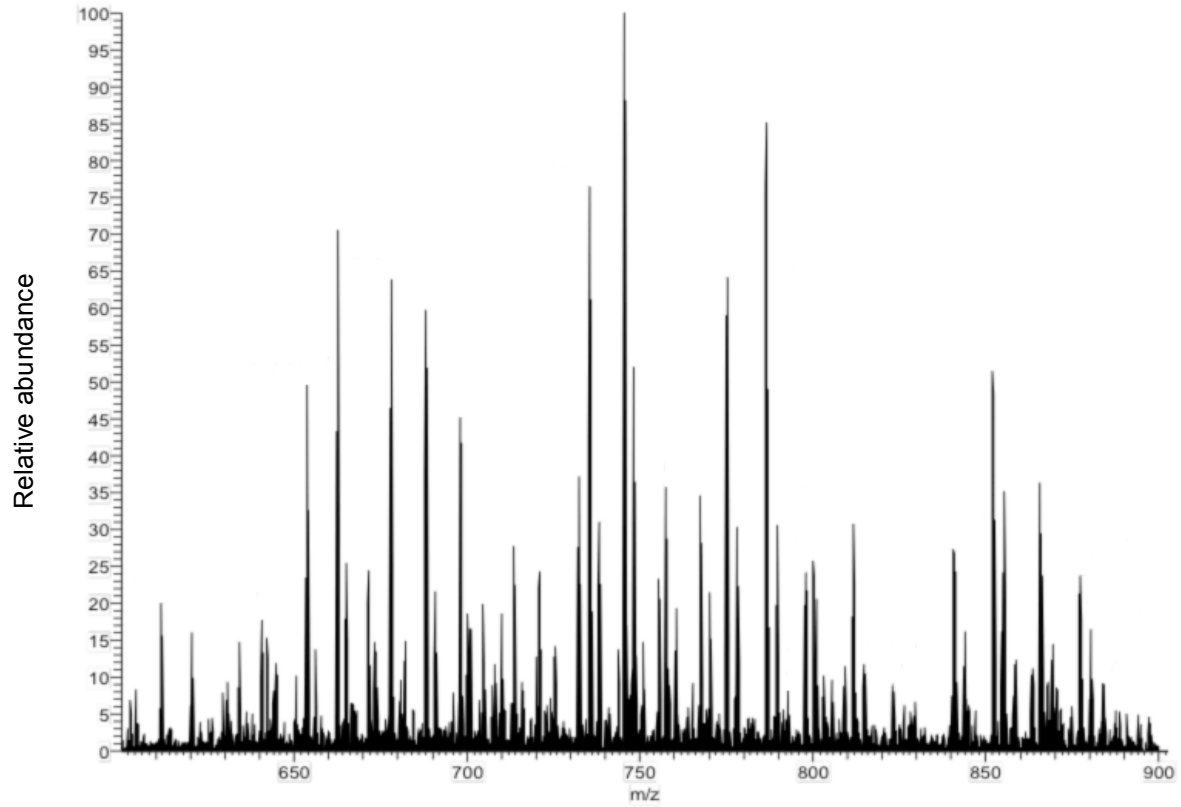

**Supplementary Figure 7.** FTMS of fraction 6.06 kDa (by PAGE) corresponding to 20 composition identifications listed in Supplementary Table 8.

| $m/z$    | $z$ | $M_{Exp}$ | $M_{Theor}$ | Accuracy (ppm) | Chain      |
|----------|-----|-----------|-------------|----------------|------------|
| 666.5848 | 7   | 4673.1484 | 4673.1488   | -0.1           | dp23-4-Ser |
| 840.8683 | 6   | 5051.2568 | 5051.2525   | 0.8            | dp25-4-Ser |
| 720.5997 | 7   | 5051.2527 | 5051.2525   | 0.0            | dp25-4-Ser |
| 630.3975 | 8   | 5051.2426 | 5051.2525   | -2.0           | dp25-4-Ser |
| 732.0219 | 7   | 5131.2081 | 5131.2025   | 1.1            | dp25-5-Ser |
| 743.4461 | 7   | 5211.1775 | 5211.1525   | 4.8            | dp25-6-Ser |
| 650.3885 | 8   | 5211.1706 | 5211.1525   | 3.5            | dp25-6-Ser |
| 757.1735 | 7   | 5307.2693 | 5307.2346   | 6.5            | dp26-5-Ser |
| 774.9020 | 7   | 5431.3688 | 5431.3718   | -0.6           | dp27-4-Ser |
| 687.7819 | 8   | 5510.3178 | 5510.3140   | 0.7            | dp27-5-Ser |
| 797.7469 | 7   | 5591.2831 | 5591.2718   | 2.0            | dp27-6-Ser |
| 697.9027 | 8   | 5591.2842 | 5591.2718   | 2.2            | dp27-6-Ser |
| 799.9048 | 7   | 5606.3884 | 5606.3961   | -1.4           | dp28-4-Ser |
| 699.7905 | 8   | 5606.3866 | 5606.3961   | -1.7           | dp28-4-Ser |
| 811.4718 | 7   | 5687.3574 | 5687.3539   | 0.6            | dp28-5-Ser |
| 709.9115 | 8   | 5687.3546 | 5687.3539   | 0.1            | dp28-5-Ser |
| 719.9065 | 8   | 5767.3146 | 5767.3039   | 1.9            | dp28-6-Ser |
| 644.5983 | 9   | 5810.4551 | 5810.4833   | -4.9           | dp29-4-Ser |
| 851.7631 | 7   | 5969.3965 | 5969.3755   | 3.5            | dp29-6-Ser |
| 745.1670 | 8   | 5969.3986 | 5969.3755   | 3.9            | dp29-6-Ser |
| 755.1648 | 8   | 6049.3810 | 6049.3255   | 9.2            | dp29-7-Ser |
| 854.1977 | 7   | 5986.4387 | 5986.5154   | -12.8          | dp30-4-Ser |
| 747.3016 | 8   | 5986.4754 | 5986.5154   | -6.7           | dp30-4-Ser |
| 664.1592 | 9   | 5986.5032 | 5986.5154   | -2.0           | dp30-4-Ser |
| 865.4865 | 7   | 6065.4603 | 6065.4576   | 0.4            | dp30-5-Ser |
| 876.9095 | 7   | 6145.4213 | 6145.4076   | 2.2            | dp30-6-Ser |
| 633.9422 | 10  | 6349.5003 | 6349.4948   | 0.9            | dp31-6-Ser |
| 802.6744 | 8   | 6429.4578 | 6429.4448   | 2.0            | dp31-7-Ser |
| 713.3768 | 9   | 6429.4616 | 6429.4448   | 2.6            | dp31-7-Ser |
| 641.9383 | 10  | 6429.4613 | 6429.4448   | 2.6            | dp31-7-Ser |
| 824.8048 | 8   | 6606.5010 | 6606.4847   | 2.5            | dp32-7-Ser |

**Supplementary Table 8.** Accurate mass measurements for 20 compositions identified by FTMS of 6.06 kDa (by PAGE). Mass spectrum was acquired on the orbitrap FT mass spectrometer.

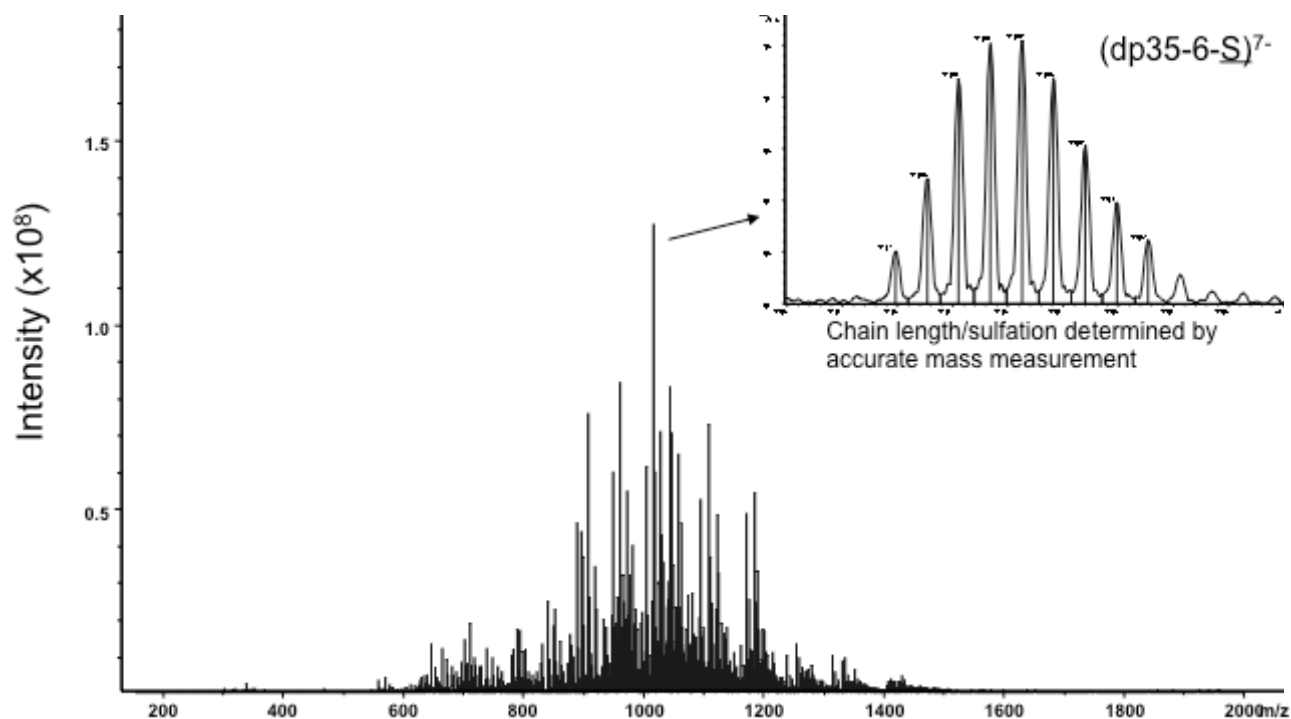

**Supplementary Figure 8.** FT-ICR MS of fraction 7.23 kDa (by PAGE) corresponding to 34 composition identifications listed in Supplementary Table 9. Zoom inset shows an example of the high resolution allowing accurate mass measurement of dp35-6-Ser with  $m/z = 1014.2332$  ( $z = 7$ ).

| $m/z$     | $z$ | $M_{Exp}$ | $M_{Theor}$ | Accuracy (ppm) | Chain      |
|-----------|-----|-----------|-------------|----------------|------------|
| 828.7751  | 7   | 5809.4881 | 5809.4671   | -3.6           | dp29-4-Ser |
| 725.0519  | 8   | 5809.4854 | 5809.4671   | -3.2           | dp29-4-Ser |
| 967.2364  | 6   | 5809.4652 | 5809.4671   | 0.3            | dp29-4-Ser |
| 1160.8820 | 5   | 5809.4490 | 5809.4671   | 3.1            | dp29-4-Ser |
| 840.3401  | 7   | 5889.4353 | 5889.4239   | -1.9           | dp29-5-Ser |
| 653.3713  | 9   | 5889.4119 | 5889.4239   | 2.0            | dp29-5-Ser |
| 735.1683  | 8   | 5889.4088 | 5889.4239   | 2.6            | dp29-5-Ser |
| 980.5581  | 6   | 5889.3954 | 5889.4239   | 4.8            | dp29-5-Ser |
| 993.8924  | 6   | 5969.4012 | 5969.3807   | -3.4           | dp29-6-Ser |
| 745.1649  | 8   | 5969.3816 | 5969.3807   | -0.2           | dp29-6-Ser |
| 851.7572  | 7   | 5969.3550 | 5969.3807   | 4.3            | dp29-6-Ser |
| 854.0693  | 7   | 5985.5397 | 5985.4993   | -6.7           | dp30-4-Ser |
| 1009.9061 | 6   | 6065.4834 | 6065.4561   | -4.5           | dp30-5-Ser |
| 865.4866  | 7   | 6065.4608 | 6065.4561   | -0.8           | dp30-5-Ser |
| 1030.4260 | 6   | 6188.6028 | 6188.5786   | -3.9           | dp31-4-Ser |
| 882.9329  | 7   | 6188.5927 | 6188.5786   | -2.3           | dp31-4-Ser |
| 1236.7021 | 5   | 6188.5495 | 6188.5786   | 4.7            | dp31-4-Ser |
| 695.4984  | 9   | 6268.5558 | 6268.5354   | -3.3           | dp31-5-Ser |
| 894.4987  | 7   | 6268.5455 | 6268.5354   | -1.6           | dp31-5-Ser |
| 782.5588  | 8   | 6268.5328 | 6268.5354   | 0.4            | dp31-5-Ser |
| 625.8448  | 10  | 6268.5260 | 6268.5354   | 1.5            | dp31-5-Ser |
| 1043.7442 | 6   | 6268.5120 | 6268.5354   | 3.7            | dp31-5-Ser |
| 1252.6908 | 5   | 6268.4930 | 6268.5354   | 6.8            | dp31-5-Ser |
| 1057.0776 | 6   | 6348.5124 | 6348.4922   | -3.2           | dp31-6-Ser |
| 905.9216  | 7   | 6348.5058 | 6348.4922   | -2.1           | dp31-6-Ser |
| 792.5540  | 8   | 6348.4944 | 6348.4922   | -0.3           | dp31-6-Ser |
| 704.3801  | 9   | 6348.4911 | 6348.4922   | 0.2            | dp31-6-Ser |
| 633.8409  | 10  | 6348.4870 | 6348.4922   | 0.8            | dp31-6-Ser |
| 706.1751  | 9   | 6364.6461 | 6364.6108   | -5.5           | dp32-4-Ser |
| 1059.7653 | 6   | 6364.6386 | 6364.6108   | -4.4           | dp32-4-Ser |
| 1070.4028 | 6   | 6428.4636 | 6428.4490   | -2.3           | dp31-7-Ser |
| 641.8377  | 10  | 6428.4550 | 6428.4490   | -0.9           | dp31-7-Ser |
| 917.3429  | 7   | 6428.4549 | 6428.4490   | -0.9           | dp31-7-Ser |
| 802.5490  | 8   | 6428.4544 | 6428.4490   | -0.8           | dp31-7-Ser |
| 713.2613  | 9   | 6428.4219 | 6428.4490   | 4.2            | dp31-7-Ser |

**Supplementary Table 9.** Accurate mass measurements for 34 compositions identified by FT-ICR MS of 7.23 kDa (by PAGE). Mass spectrum was acquired on the Bruker FT-ICR mass spectrometer.



| $m/z$     | $z$ | $M_{Exp}$ | $M_{Theor}$ | Accuracy (ppm) | Chain      |
|-----------|-----|-----------|-------------|----------------|------------|
| 919.6471  | 7   | 6444.5843 | 6444.5676   | -2.6           | dp32-5-Ser |
| 715.0564  | 9   | 6444.5778 | 6444.5676   | -1.6           | dp32-5-Ser |
| 804.4376  | 8   | 6444.5710 | 6444.5676   | -0.5           | dp32-5-Ser |
| 643.3482  | 10  | 6444.5678 | 6444.5676   | 0.0            | dp32-5-Ser |
| 1073.0849 | 6   | 6444.5562 | 6444.5676   | 1.8            | dp32-5-Ser |
| 928.6156  | 7   | 6508.3716 | 6508.4058   | 5.3            | dp31-8-Ser |
| 812.5380  | 8   | 6508.3664 | 6508.4058   | 6.1            | dp31-8-Ser |
| 723.9410  | 9   | 6524.5392 | 6524.5244   | -2.3           | dp32-6-Ser |
| 814.5589  | 8   | 6524.5336 | 6524.5244   | -1.4           | dp32-6-Ser |
| 651.4448  | 10  | 6524.5260 | 6524.5244   | -0.2           | dp32-6-Ser |
| 931.0662  | 7   | 6524.5180 | 6524.5244   | 1.0            | dp32-6-Ser |
| 1086.4091 | 6   | 6524.5014 | 6524.5244   | 3.5            | dp32-6-Ser |
| 819.9543  | 8   | 6567.6968 | 6567.6901   | -1.0           | dp33-4-Ser |
| 728.7358  | 9   | 6567.6924 | 6567.6901   | -0.4           | dp33-4-Ser |
| 1093.6074 | 6   | 6567.6912 | 6567.6901   | -0.2           | dp33-4-Ser |
| 1312.5304 | 5   | 6567.6910 | 6567.6901   | -0.1           | dp33-4-Ser |
| 937.2332  | 7   | 6567.6870 | 6567.6901   | 0.5            | dp33-4-Ser |
| 655.7589  | 10  | 6567.6670 | 6567.6901   | 3.5            | dp33-4-Ser |
| 737.6214  | 9   | 6647.6628 | 6647.6469   | -2.4           | dp33-5-Ser |
| 829.9492  | 8   | 6647.6560 | 6647.6469   | -1.4           | dp33-5-Ser |
| 663.7577  | 10  | 6647.6550 | 6647.6469   | -1.2           | dp33-5-Ser |
| 948.6539  | 7   | 6647.6319 | 6647.6469   | 2.3            | dp33-5-Ser |
| 1106.9276 | 6   | 6647.6124 | 6647.6469   | 5.2            | dp33-5-Ser |
| 1328.5144 | 5   | 6647.6110 | 6647.6469   | 5.4            | dp33-5-Ser |
| 839.9436  | 8   | 6727.6112 | 6727.6037   | -1.1           | dp33-6-Ser |
| 671.7527  | 10  | 6727.6050 | 6727.6037   | -0.2           | dp33-6-Ser |
| 1344.5129 | 5   | 6727.6035 | 6727.6037   | 0.0            | dp33-6-Ser |
| 960.0777  | 7   | 6727.5985 | 6727.6037   | 0.8            | dp33-6-Ser |
| 746.5024  | 9   | 6727.5918 | 6727.6037   | 1.8            | dp33-6-Ser |
| 610.5908  | 11  | 6727.5846 | 6727.6037   | 2.8            | dp33-6-Ser |
| 1120.2523 | 6   | 6727.5606 | 6727.6037   | 6.4            | dp33-6-Ser |
| 1122.7794 | 6   | 6743.7310 | 6743.7223   | -1.3           | dp34-4-Ser |
| 755.3900  | 9   | 6807.5802 | 6807.5605   | -2.9           | dp33-7-Ser |
| 849.9373  | 8   | 6807.5608 | 6807.5605   | 0.0            | dp33-7-Ser |
| 971.4990  | 7   | 6807.5476 | 6807.5605   | 1.9            | dp33-7-Ser |
| 617.8601  | 11  | 6807.5469 | 6807.5605   | 2.0            | dp33-7-Ser |
| 679.7468  | 10  | 6807.5460 | 6807.5605   | 2.1            | dp33-7-Ser |
| 1133.5782 | 6   | 6807.5160 | 6807.5605   | 6.5            | dp33-7-Ser |
| 973.6594  | 7   | 6823.6782 | 6823.6791   | 0.1            | dp34-5-Ser |
| 1136.1032 | 6   | 6823.6738 | 6823.6791   | 0.8            | dp34-5-Ser |

Supplementary Table 9. (Continued).

| $m/z$     | $z$ | $M_{Exp}$ | $M_{Theor}$ | Accuracy (ppm) | Chain      |
|-----------|-----|-----------|-------------|----------------|------------|
| 859.9325  | 8   | 6887.5224 | 6887.5173   | -0.7           | dp33-8-Ser |
| 687.7436  | 10  | 6887.5140 | 6887.5173   | 0.5            | dp33-8-Ser |
| 982.9215  | 7   | 6887.5051 | 6887.5173   | 1.8            | dp33-8-Ser |
| 1146.9078 | 6   | 6887.4936 | 6887.5173   | 3.4            | dp33-8-Ser |
| 764.2687  | 9   | 6887.4885 | 6887.5173   | 4.2            | dp33-8-Ser |
| 985.2305  | 7   | 6903.6681 | 6903.6359   | -4.7           | dp34-6-Ser |
| 1149.5995 | 6   | 6903.6438 | 6903.6359   | -1.1           | dp34-6-Ser |
| 861.8204  | 8   | 6903.6334 | 6903.6359   | 0.4            | dp34-6-Ser |
| 1162.9251 | 6   | 6983.5974 | 6983.5927   | -0.7           | dp34-7-Ser |
| 871.8153  | 8   | 6983.5926 | 6983.5927   | 0.0            | dp34-7-Ser |
| 774.8336  | 9   | 6983.5804 | 6983.5927   | 1.8            | dp34-7-Ser |
| 996.6457  | 7   | 6983.5745 | 6983.5927   | 2.6            | dp34-7-Ser |
| 697.2487  | 10  | 6983.5728 | 6983.5927   | 2.8            | dp34-7-Ser |
| 1404.3476 | 5   | 7026.7770 | 7026.7584   | -2.6           | dp35-5-Ser |
| 1002.8174 | 7   | 7026.7764 | 7026.7584   | -2.6           | dp35-5-Ser |
| 877.3379  | 8   | 7026.7656 | 7026.7584   | -1.0           | dp35-5-Ser |
| 1170.1186 | 6   | 7026.7584 | 7026.7584   | 0.0            | dp35-5-Ser |
| 637.7875  | 11  | 7026.7483 | 7026.7584   | 1.4            | dp35-5-Ser |
| 779.7410  | 9   | 7026.7392 | 7026.7584   | 2.7            | dp35-5-Ser |
| 701.6659  | 10  | 7026.7370 | 7026.7584   | 3.0            | dp35-5-Ser |
| 1183.4484 | 6   | 7106.7372 | 7106.7152   | -3.1           | dp35-6-Ser |
| 1420.3384 | 5   | 7106.7310 | 7106.7152   | -2.2           | dp35-6-Ser |
| 887.3332  | 8   | 7106.7280 | 7106.7152   | -1.8           | dp35-6-Ser |
| 709.6639  | 10  | 7106.7170 | 7106.7152   | -0.3           | dp35-6-Ser |
| 788.6274  | 9   | 7106.7168 | 7106.7152   | -0.2           | dp35-6-Ser |
| 645.0573  | 11  | 7106.7161 | 7106.7152   | -0.1           | dp35-6-Ser |
| 1014.2332 | 7   | 7106.6870 | 7106.7152   | 4.0            | dp35-6-Ser |
| 1196.7754 | 6   | 7186.6992 | 7186.6720   | -3.8           | dp35-7-Ser |
| 797.5136  | 9   | 7186.6926 | 7186.6720   | -2.9           | dp35-7-Ser |
| 652.3257  | 11  | 7186.6685 | 7186.6720   | 0.5            | dp35-7-Ser |
| 597.8797  | 12  | 7186.6500 | 7186.6720   | 3.1            | dp35-7-Ser |
| 717.6569  | 10  | 7186.6470 | 7186.6720   | 3.5            | dp35-7-Ser |
| 1025.6560 | 7   | 7186.6466 | 7186.6720   | 3.5            | dp35-7-Ser |
| 897.3227  | 8   | 7186.6440 | 7186.6720   | 3.9            | dp35-7-Ser |
| 1027.8237 | 7   | 7202.8283 | 7202.7906   | -5.2           | dp36-5-Ser |
| 899.2187  | 8   | 7202.8198 | 7202.7906   | -4.1           | dp36-5-Ser |
| 1199.2937 | 6   | 7202.8168 | 7202.7906   | -3.6           | dp36-5-Ser |
| 719.1715  | 10  | 7202.8008 | 7202.7906   | -1.4           | dp36-5-Ser |
| 799.1905  | 9   | 7202.7925 | 7202.7906   | -0.3           | dp36-5-Ser |
| 653.6982  | 11  | 7202.7738 | 7202.7906   | 2.3            | dp36-5-Ser |

Supplementary Table 9. (Continued).

| $m/z$     | $z$ | $M_{Exp}$ | $M_{Theor}$ | Accuracy (ppm) | Chain      |
|-----------|-----|-----------|-------------|----------------|------------|
| 1210.1052 | 6   | 7266.6780 | 7266.6288   | -6.8           | dp35-8-Ser |
| 659.5955  | 11  | 7266.6363 | 7266.6288   | -1.0           | dp35-8-Ser |
| 907.3211  | 8   | 7266.6312 | 7266.6288   | -0.3           | dp35-8-Ser |
| 1037.0820 | 7   | 7266.6286 | 7266.6288   | 0.0            | dp35-8-Ser |
| 806.3944  | 9   | 7266.6198 | 7266.6288   | 1.2            | dp35-8-Ser |
| 725.6526  | 10  | 7266.6040 | 7266.6288   | 3.4            | dp35-8-Ser |
| 1212.7873 | 6   | 7282.7706 | 7282.7474   | -3.2           | dp36-6-Ser |
| 727.2677  | 10  | 7282.7550 | 7282.7474   | -1.0           | dp36-6-Ser |
| 661.0605  | 11  | 7282.7513 | 7282.7474   | -0.5           | dp36-6-Ser |
| 808.1813  | 9   | 7282.7019 | 7282.7474   | 6.2            | dp36-6-Ser |
| 1226.1114 | 6   | 7362.7152 | 7362.7042   | -1.5           | dp36-7-Ser |
| 1050.6639 | 7   | 7362.7097 | 7362.7042   | -0.7           | dp36-7-Ser |
| 735.1620  | 10  | 7362.7058 | 7362.7042   | -0.2           | dp36-7-Ser |
| 668.3288  | 11  | 7362.7026 | 7362.7042   | 0.2            | dp36-7-Ser |
| 817.0675  | 9   | 7362.6777 | 7362.7042   | 3.6            | dp36-7-Ser |
| 1068.2615 | 7   | 7485.8929 | 7485.8267   | -8.8           | dp37-6-Ser |
| 747.4771  | 10  | 7485.8568 | 7485.8267   | -4.0           | dp37-6-Ser |
| 622.7295  | 12  | 7485.8554 | 7485.8267   | -3.8           | dp37-6-Ser |
| 679.4317  | 11  | 7485.8423 | 7485.8267   | -2.1           | dp37-6-Ser |
| 1259.9605 | 6   | 7565.8098 | 7565.7835   | -3.5           | dp37-7-Ser |
| 1079.8218 | 7   | 7565.8072 | 7565.7835   | -3.1           | dp37-7-Ser |
| 944.7168  | 8   | 7565.7968 | 7565.7835   | -1.8           | dp37-7-Ser |
| 629.4741  | 12  | 7565.7828 | 7565.7835   | 0.1            | dp37-7-Ser |
| 686.7888  | 11  | 7565.7626 | 7565.7835   | 2.8            | dp37-7-Ser |
| 954.7129  | 8   | 7645.7656 | 7645.7403   | -3.3           | dp37-8-Ser |
| 848.5215  | 9   | 7645.7637 | 7645.7403   | -3.1           | dp37-8-Ser |
| 1091.2439 | 7   | 7645.7619 | 7645.7403   | -2.8           | dp37-8-Ser |
| 636.1368  | 12  | 7645.7352 | 7645.7403   | 0.7            | dp37-8-Ser |
| 694.0574  | 11  | 7645.7172 | 7645.7403   | 3.0            | dp37-8-Ser |
| 763.5617  | 10  | 7645.6950 | 7645.7403   | 5.9            | dp37-8-Ser |
| 1102.6669 | 7   | 7725.7229 | 7725.6791   | -5.7           | dp37-9-Ser |
| 964.7026  | 8   | 7725.6832 | 7725.6791   | -0.5           | dp37-9-Ser |
| 857.3997  | 9   | 7725.6675 | 7725.6791   | 1.5            | dp37-9-Ser |
| 1104.8227 | 7   | 7741.8213 | 7741.8157   | -0.7           | dp38-7-Ser |
| 859.0815  | 9   | 7741.8115 | 7741.8157   | 0.5            | dp38-7-Ser |
| 702.7007  | 11  | 7741.8013 | 7741.8157   | 1.9            | dp38-7-Ser |

Supplementary Table 9. (Continued).

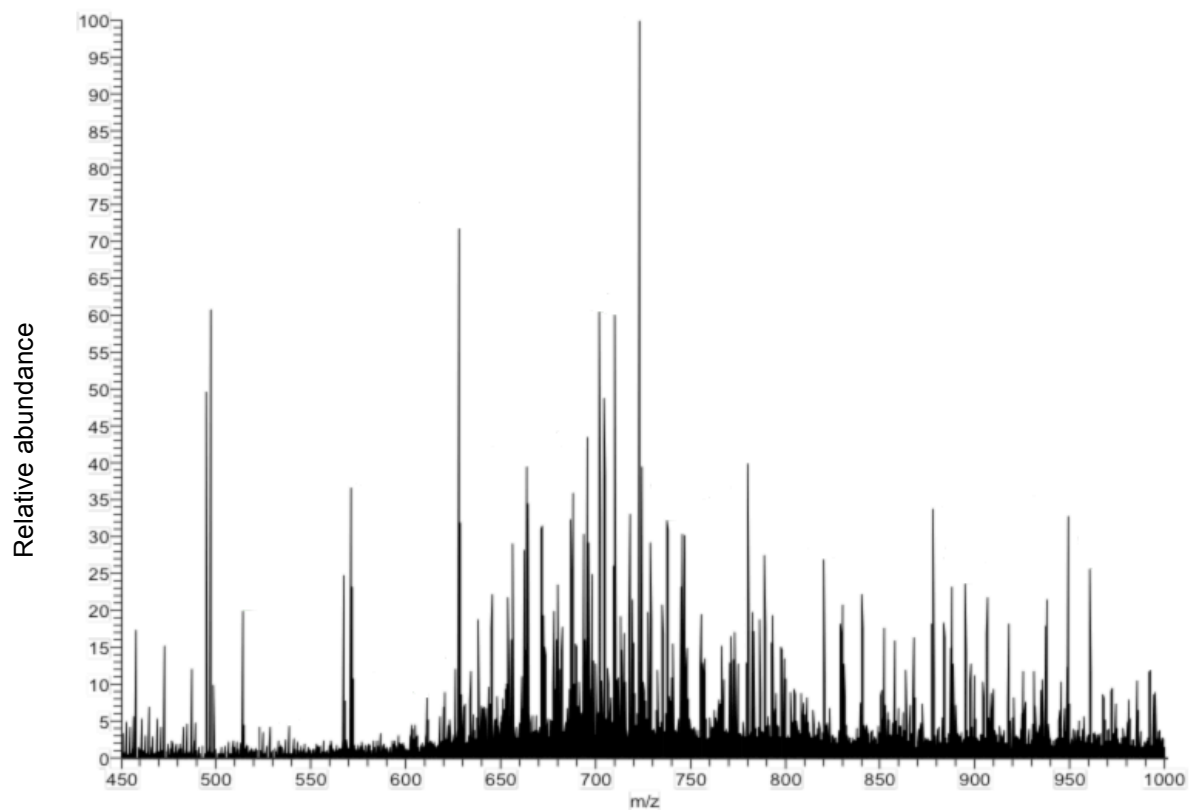

**Supplementary Figure 9.** FTMS of fraction 7.31 kDa (by PAGE) corresponding to 32 composition identifications listed in Supplementary Table 10.

| $m/z$    | $z$ | $M_{Exp}$ | $M_{Theor}$ | Accuracy (ppm) | Chain      |
|----------|-----|-----------|-------------|----------------|------------|
| 904.2179 | 6   | 5431.3544 | 5431.3718   | -3.2           | dp27-4-Ser |
| 774.9013 | 7   | 5431.3639 | 5431.3718   | -1.5           | dp27-4-Ser |
| 687.7808 | 8   | 5510.3090 | 5510.3140   | -0.9           | dp27-5-Ser |
| 917.3776 | 6   | 5510.3126 | 5510.3140   | -0.3           | dp27-5-Ser |
| 786.1801 | 7   | 5510.3155 | 5510.3140   | 0.3            | dp27-5-Ser |
| 930.8713 | 6   | 5591.2748 | 5591.2718   | 0.5            | dp27-6-Ser |
| 811.3275 | 7   | 5686.3473 | 5686.3461   | 0.2            | dp28-5-Ser |
| 719.9057 | 8   | 5767.3082 | 5767.3039   | 0.7            | dp28-6-Ser |
| 829.0595 | 7   | 5810.4713 | 5810.4833   | -2.1           | dp29-4-Ser |
| 967.4047 | 6   | 5810.4752 | 5810.4833   | -1.4           | dp29-4-Ser |
| 980.5635 | 6   | 5889.4280 | 5889.4255   | 0.4            | dp29-5-Ser |
| 735.1716 | 8   | 5889.4354 | 5889.4255   | 1.7            | dp29-5-Ser |
| 840.4814 | 7   | 5890.4246 | 5890.4333   | -1.5           | dp29-5-Ser |
| 653.4840 | 9   | 5890.4264 | 5890.4333   | -1.2           | dp29-5-Ser |
| 662.2570 | 9   | 5969.3834 | 5969.3755   | 1.3            | dp29-6-Ser |
| 745.2909 | 8   | 5970.3898 | 5970.3833   | 1.1            | dp29-6-Ser |
| 671.1418 | 9   | 6049.3466 | 6049.3255   | 3.5            | dp29-7-Ser |
| 863.3282 | 7   | 6050.3522 | 6050.3333   | 3.1            | dp29-7-Ser |
| 686.6124 | 9   | 6188.5820 | 6188.5870   | -0.8           | dp31-4-Ser |
| 883.0777 | 7   | 6188.5987 | 6188.5870   | 1.9            | dp31-4-Ser |
| 782.5576 | 8   | 6268.5234 | 6268.5370   | -2.2           | dp31-5-Ser |
| 894.6401 | 7   | 6269.5355 | 6269.5478   | -2.0           | dp31-5-Ser |
| 704.3825 | 9   | 6348.5129 | 6348.4870   | 4.1            | dp31-6-Ser |
| 906.0640 | 7   | 6349.5028 | 6349.4978   | 0.8            | dp31-6-Ser |
| 792.6809 | 8   | 6349.5098 | 6349.4978   | 1.9            | dp31-6-Ser |
| 802.7999 | 8   | 6430.4618 | 6430.4527   | 1.4            | dp31-7-Ser |
| 706.2832 | 9   | 6365.6192 | 6365.6269   | -1.2           | dp32-4-Ser |
| 794.8198 | 8   | 6366.6210 | 6366.6347   | -2.2           | dp32-4-Ser |
| 919.9308 | 7   | 6446.5704 | 6446.5847   | -2.2           | dp32-5-Ser |
| 804.8145 | 8   | 6446.5786 | 6446.5847   | -1.0           | dp32-5-Ser |
| 724.0518 | 9   | 6525.5366 | 6525.5269   | 1.5            | dp32-6-Ser |
| 655.7592 | 10  | 6567.6703 | 6567.6970   | -4.1           | dp33-4-Ser |
| 728.7354 | 9   | 6567.6890 | 6567.6970   | -1.2           | dp33-4-Ser |
| 820.0778 | 8   | 6568.6850 | 6568.7048   | -3.0           | dp33-4-Ser |
| 737.6174 | 9   | 6647.6270 | 6647.6500   | -3.5           | dp33-5-Ser |
| 829.9471 | 8   | 6647.6394 | 6647.6500   | -1.6           | dp33-5-Ser |
| 663.7575 | 10  | 6647.6533 | 6647.6500   | 0.5            | dp33-5-Ser |
| 948.6570 | 7   | 6647.6538 | 6647.6500   | 0.6            | dp33-5-Ser |

**Supplementary Table 10.** Accurate mass measurements for 32 compositions identified by FTMS of 7.31 kDa (by PAGE). Mass spectrum was acquired on the orbitrap FT mass spectrometer.

| $m/z$    | $z$ | $M_{Exp}$ | $M_{Theor}$ | Accuracy (ppm) | Chain      |
|----------|-----|-----------|-------------|----------------|------------|
| 746.5047 | 9   | 6727.6127 | 6727.5970   | 2.3            | dp33-6-Ser |
| 671.7543 | 10  | 6727.6213 | 6727.5970   | 3.6            | dp33-6-Ser |
| 840.0684 | 8   | 6728.6098 | 6728.6048   | 0.7            | dp33-6-Ser |
| 850.0638 | 8   | 6808.5730 | 6808.5548   | 2.7            | dp33-7-Ser |
| 679.8501 | 10  | 6808.5793 | 6808.5548   | 3.6            | dp33-7-Ser |
| 673.5639 | 10  | 6745.7173 | 6745.7447   | -4.1           | dp34-4-Ser |
| 689.4566 | 10  | 6904.6443 | 6904.6369   | 1.1            | dp34-6-Ser |
| 766.1759 | 9   | 6904.6535 | 6904.6369   | 2.4            | dp34-6-Ser |
| 867.3425 | 8   | 6946.8026 | 6946.8070   | -0.6           | dp35-4-Ser |
| 693.6743 | 10  | 6946.8213 | 6946.8070   | 2.1            | dp35-4-Ser |
| 991.5308 | 7   | 6947.7704 | 6947.8148   | -6.4           | dp35-4-Ser |
| 637.8779 | 11  | 7027.7430 | 7027.7678   | -3.5           | dp35-5-Ser |
| 701.6666 | 10  | 7026.7443 | 7026.7570   | -1.8           | dp35-5-Ser |
| 779.7431 | 9   | 7026.7583 | 7026.7570   | 0.2            | dp35-5-Ser |
| 877.3374 | 8   | 7026.7618 | 7026.7570   | 0.7            | dp35-5-Ser |
| 709.6628 | 10  | 7106.7063 | 7106.7070   | -0.1           | dp35-6-Ser |
| 887.3352 | 8   | 7106.7442 | 7106.7070   | 5.2            | dp35-6-Ser |
| 717.6582 | 10  | 7186.6603 | 7186.6570   | 0.5            | dp35-7-Ser |
| 889.4720 | 8   | 7123.8386 | 7123.8469   | -1.2           | dp36-4-Ser |
| 719.2692 | 10  | 7202.7703 | 7202.7891   | -2.6           | dp36-5-Ser |
| 653.7910 | 11  | 7202.7871 | 7202.7891   | -0.3           | dp36-5-Ser |
| 909.4616 | 8   | 7283.7554 | 7283.7469   | 1.2            | dp36-6-Ser |
| 924.9781 | 8   | 7407.8874 | 7407.8827   | 0.6            | dp37-5-Ser |
| 679.5236 | 11  | 7485.8457 | 7485.8170   | 3.8            | dp37-6-Ser |
| 686.8822 | 11  | 7566.7903 | 7566.7748   | 2.0            | dp37-7-Ser |
| 839.7471 | 9   | 7566.7943 | 7566.7748   | 2.6            | dp37-7-Ser |
| 944.8430 | 8   | 7566.8066 | 7566.7748   | 4.2            | dp37-7-Ser |

Supplementary Table 10. (Continued).

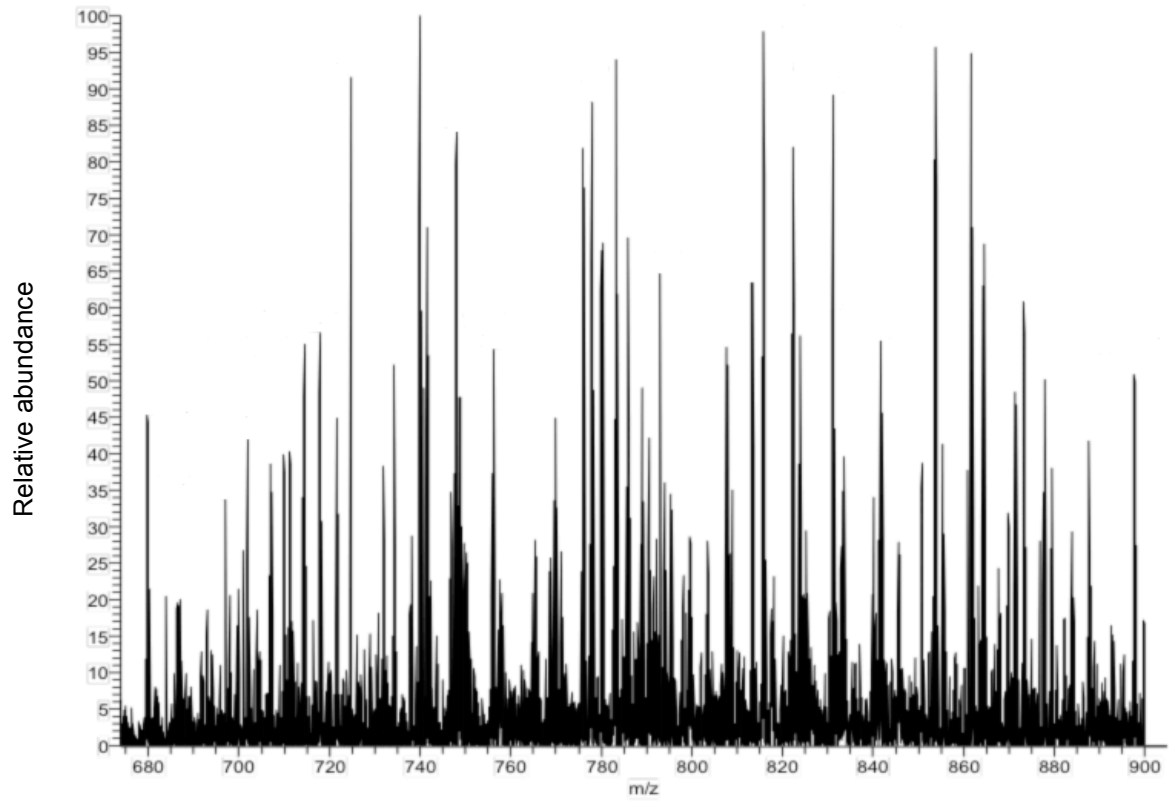

**Supplementary Figure 10.** FTMS of fraction 8.16 kDa (by PAGE) corresponding to 34 composition identifications listed in Supplementary Table 11.

| $m/z$    | $z$ | $M_{Exp}$ | $M_{Theor}$ | Accuracy (ppm) | Chain      |
|----------|-----|-----------|-------------|----------------|------------|
| 737.6179 | 9   | 6647.6315 | 6647.6470   | -2.3           | dp33-5-Ser |
| 746.6155 | 9   | 6728.6099 | 6728.6048   | 0.8            | dp33-6-Ser |
| 770.9690 | 9   | 6947.7914 | 6947.8148   | -3.4           | dp35-4-Ser |
| 877.3353 | 8   | 7026.7450 | 7026.7570   | -1.7           | dp35-5-Ser |
| 788.6285 | 9   | 7106.7269 | 7106.7070   | 2.8            | dp35-6-Ser |
| 797.7322 | 9   | 7188.6602 | 7188.6727   | -1.7           | dp35-7-Ser |
| 731.5814 | 10  | 7325.8923 | 7325.9170   | -3.4           | dp37-4-Ser |
| 739.5772 | 10  | 7405.8503 | 7405.8670   | -2.3           | dp37-5-Ser |
| 821.8686 | 9   | 7405.8878 | 7405.8670   | 2.8            | dp37-5-Ser |
| 830.7504 | 9   | 7485.8240 | 7485.8170   | 0.9            | dp37-6-Ser |
| 747.5780 | 10  | 7485.8583 | 7485.8170   | 5.5            | dp37-6-Ser |
| 755.5726 | 10  | 7565.8043 | 7565.7670   | 4.9            | dp37-7-Ser |
| 832.6491 | 9   | 7502.9123 | 7502.9569   | -5.9           | dp38-4-Ser |
| 757.1806 | 10  | 7581.8843 | 7581.8991   | -2.0           | dp38-5-Ser |
| 765.2793 | 10  | 7662.8713 | 7662.8569   | 1.9            | dp38-6-Ser |
| 769.5941 | 10  | 7706.0193 | 7706.0348   | -2.0           | dp39-4-Ser |
| 699.5402 | 11  | 7706.0283 | 7706.0348   | -0.8           | dp39-4-Ser |
| 777.4848 | 10  | 7784.9263 | 7784.9770   | -6.5           | dp39-5-Ser |
| 872.8734 | 9   | 7864.9310 | 7864.9270   | 0.5            | dp39-6-Ser |
| 713.9867 | 11  | 7864.9398 | 7864.9270   | 1.6            | dp39-6-Ser |
| 785.5820 | 10  | 7865.8983 | 7865.9348   | -4.6           | dp39-6-Ser |
| 721.2539 | 11  | 7944.8790 | 7944.8770   | 0.2            | dp39-7-Ser |
| 793.5823 | 10  | 7945.9013 | 7945.8848   | 2.1            | dp39-7-Ser |
| 795.0907 | 10  | 7960.9853 | 7961.0091   | -3.0           | dp40-4-Ser |
| 892.5455 | 9   | 8041.9799 | 8041.9669   | 1.6            | dp40-6-Ser |
| 733.9995 | 11  | 8085.0806 | 8085.1448   | -7.9           | dp41-4-Ser |
| 807.5049 | 10  | 8085.1273 | 8085.1448   | -2.2           | dp41-4-Ser |
| 897.3401 | 9   | 8085.1313 | 8085.1448   | -1.7           | dp41-4-Ser |
| 815.3996 | 10  | 8164.0743 | 8164.0870   | -1.6           | dp41-5-Ser |
| 748.5409 | 11  | 8245.0360 | 8245.0448   | -1.1           | dp41-6-Ser |
| 692.8252 | 12  | 8325.9963 | 8326.0027   | -0.8           | dp41-7-Ser |
| 833.3025 | 10  | 8343.1033 | 8343.1426   | -4.7           | dp42-5-Ser |
| 768.5592 | 11  | 8465.2373 | 8465.2627   | -3.0           | dp43-4-Ser |
| 853.3098 | 10  | 8543.1763 | 8543.1970   | -2.4           | dp43-5-Ser |
| 717.6721 | 12  | 8624.1591 | 8624.1548   | 0.5            | dp43-6-Ser |
| 790.2783 | 11  | 8704.1474 | 8704.1048   | 4.9            | dp43-7-Ser |
| 863.2181 | 10  | 8642.2593 | 8642.3026   | -5.0           | dp44-4-Ser |
| 871.0173 | 10  | 8720.2513 | 8720.2369   | 1.6            | dp44-5-Ser |
| 879.1125 | 10  | 8801.2033 | 8801.1947   | 1.0            | dp44-6-Ser |
| 810.2007 | 11  | 8923.2938 | 8923.3148   | -2.4           | dp45-5-Ser |
| 817.4708 | 11  | 9003.2649 | 9003.2648   | 0.0            | dp45-6-Ser |
| 691.5525 | 13  | 9003.2842 | 9003.2648   | 2.2            | dp45-6-Ser |
| 697.7809 | 13  | 9084.2534 | 9084.2227   | 3.4            | dp45-7-Ser |

**Supplementary Table 11.** Accurate mass measurements of compositions by FTMS of 8.16 kDa (by PAGE), acquired on the orbitrap FT mass spectrometer.



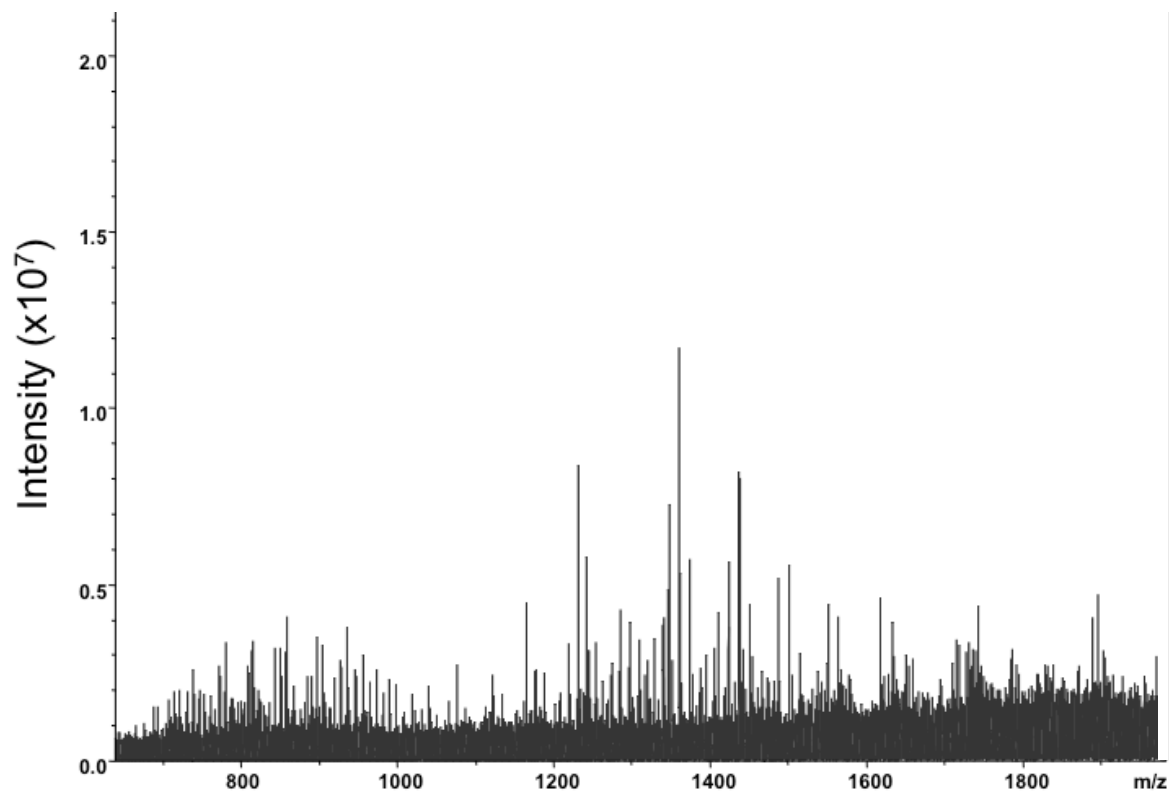

**Supplementary Figure 11.** FT-ICR MS of fraction 9.46 kDa (by PAGE) corresponding to 20 composition identifications listed in Supplementary Table 12.

| $m/z$     | $z$ | $M_{Exp}$ | $M_{Theor}$ | Accuracy (ppm) | Chain      |
|-----------|-----|-----------|-------------|----------------|------------|
| 1539.7989 | 5   | 7705.0413 | 7705.0246   | -2.2           | dp39-4-Ser |
| 1346.3453 | 6   | 8084.1186 | 8084.1361   | 2.2            | dp41-4-Ser |
| 741.0896  | 11  | 8164.0792 | 8164.0929   | 1.7            | dp41-5-Ser |
| 1631.6065 | 5   | 8164.0793 | 8164.0929   | 1.7            | dp41-5-Ser |
| 1165.1487 | 7   | 8164.1025 | 8164.0929   | -1.2           | dp41-5-Ser |
| 906.0031  | 9   | 8164.1059 | 8164.0929   | -1.6           | dp41-5-Ser |
| 815.3029  | 10  | 8164.1148 | 8164.0929   | -2.7           | dp41-5-Ser |
| 1372.8324 | 6   | 8244.0490 | 8244.0497   | 0.1            | dp41-6-Ser |
| 1176.7183 | 7   | 8244.0827 | 8244.0497   | -4.0           | dp41-6-Ser |
| 1386.3316 | 6   | 8324.0364 | 8324.0065   | -3.6           | dp41-7-Ser |
| 775.5549  | 11  | 8543.1975 | 8543.2044   | 0.8            | dp43-5-Ser |
| 1422.6941 | 6   | 8543.2192 | 8543.2044   | -1.7           | dp43-5-Ser |
| 853.2144  | 10  | 8543.2298 | 8543.2044   | -3.0           | dp43-5-Ser |
| 948.1307  | 9   | 8543.2543 | 8543.2044   | -5.8           | dp43-5-Ser |
| 1436.1846 | 6   | 8623.1544 | 8623.1612   | 0.8            | dp43-6-Ser |
| 861.3081  | 10  | 8623.1590 | 8623.1612   | 0.3            | dp43-6-Ser |
| 717.5890  | 12  | 8623.1616 | 8623.1612   | 0.0            | dp43-6-Ser |
| 957.1217  | 9   | 8623.1655 | 8623.1612   | -0.5           | dp43-6-Ser |
| 1723.6254 | 5   | 8623.1660 | 8623.1612   | -0.6           | dp43-6-Ser |
| 1076.8936 | 8   | 8623.2112 | 8623.1612   | -5.8           | dp43-6-Ser |
| 1230.8853 | 7   | 8623.2517 | 8623.1612   | -10.5          | dp43-6-Ser |
| 965.8933  | 9   | 8703.1177 | 8703.1180   | 0.0            | dp43-7-Ser |
| 869.3048  | 10  | 8703.1260 | 8703.1180   | -0.9           | dp43-7-Ser |
| 790.0950  | 11  | 8703.1386 | 8703.1180   | -2.4           | dp43-7-Ser |
| 1242.2987 | 7   | 8703.1455 | 8703.1180   | -3.2           | dp43-7-Ser |
| 1449.5191 | 6   | 8703.1614 | 8703.1180   | -5.0           | dp43-7-Ser |
| 1452.0488 | 6   | 8719.3474 | 8719.2366   | -12.7          | dp44-5-Ser |
| 1253.7151 | 7   | 8783.0603 | 8783.0748   | 1.7            | dp43-8-Ser |
| 1465.3559 | 6   | 8799.1900 | 8799.1934   | 0.4            | dp44-6-Ser |
| 798.8273  | 11  | 8799.1939 | 8799.1934   | -0.1           | dp44-6-Ser |
| 810.0217  | 11  | 8922.3323 | 8922.3159   | -1.8           | dp45-5-Ser |
| 891.1265  | 10  | 8922.3508 | 8922.3159   | -3.9           | dp45-5-Ser |
| 1485.8926 | 6   | 8922.4102 | 8922.3159   | -10.6          | dp45-5-Ser |

**Supplementary Table 12.** Accurate mass measurements for 20 compositions identified by FT-ICR MS of 9.46 kDa (by PAGE). Mass spectrum was acquired on the Bruker FT-ICR mass spectrometer.

| <i>m/z</i> | <i>z</i> | <b>M<sub>Exp</sub></b> | <b>M<sub>Theor</sub></b> | <b>Accuracy<br/>(ppm)</b> | <b>Chain</b> |
|------------|----------|------------------------|--------------------------|---------------------------|--------------|
| 1499.3674  | 6        | 9002.2512              | 9002.2727                | 2.4                       | dp45-6-Ser   |
| 817.3795   | 11       | 9002.2603              | 9002.2727                | 1.4                       | dp45-6-Ser   |
| 1285.0304  | 7        | 9002.2674              | 9002.2727                | 0.6                       | dp45-6-Ser   |
| 1296.4648  | 7        | 9082.3082              | 9082.2295                | -8.7                      | dp45-7-Ser   |
| 1512.7146  | 6        | 9082.3344              | 9082.2295                | -11.6                     | dp45-7-Ser   |
| 1307.8728  | 7        | 9162.1642              | 9162.1863                | 2.4                       | dp45-8-Ser   |
| 1327.6226  | 7        | 9301.4206              | 9301.4274                | 0.7                       | dp47-5-Ser   |
| 844.4850   | 11       | 9301.4286              | 9301.4274                | -0.1                      | dp47-5-Ser   |
| 774.0287   | 12       | 9301.4458              | 9301.4274                | -2.0                      | dp47-5-Ser   |
| 929.0363   | 10       | 9301.4488              | 9301.4274                | -2.3                      | dp47-5-Ser   |
| 1549.0714  | 6        | 9301.4830              | 9301.4274                | -6.0                      | dp47-5-Ser   |
| 780.7732   | 12       | 9381.3720              | 9381.3842                | 1.3                       | dp47-6-Ser   |
| 937.1298   | 10       | 9381.3760              | 9381.3842                | 0.9                       | dp47-6-Ser   |
| 720.6374   | 13       | 9381.3876              | 9381.3842                | -0.4                      | dp47-6-Ser   |
| 1339.1996  | 7        | 9381.4518              | 9381.3842                | -7.2                      | dp47-6-Ser   |
| 1350.7518  | 7        | 9461.3094              | 9461.3410                | 3.3                       | dp47-7-Ser   |
| 859.1162   | 11       | 9461.3640              | 9461.3410                | -2.4                      | dp47-7-Ser   |
| 812.3652   | 12       | 9760.4760              | 9760.4957                | 2.0                       | dp49-6-Ser   |
| 1393.2025  | 7        | 9760.4799              | 9760.4957                | 1.6                       | dp49-6-Ser   |
| 1404.6382  | 7        | 9840.5298              | 9840.4525                | -7.9                      | dp49-7-Ser   |

**Supplementary Table 12.** (Continued).

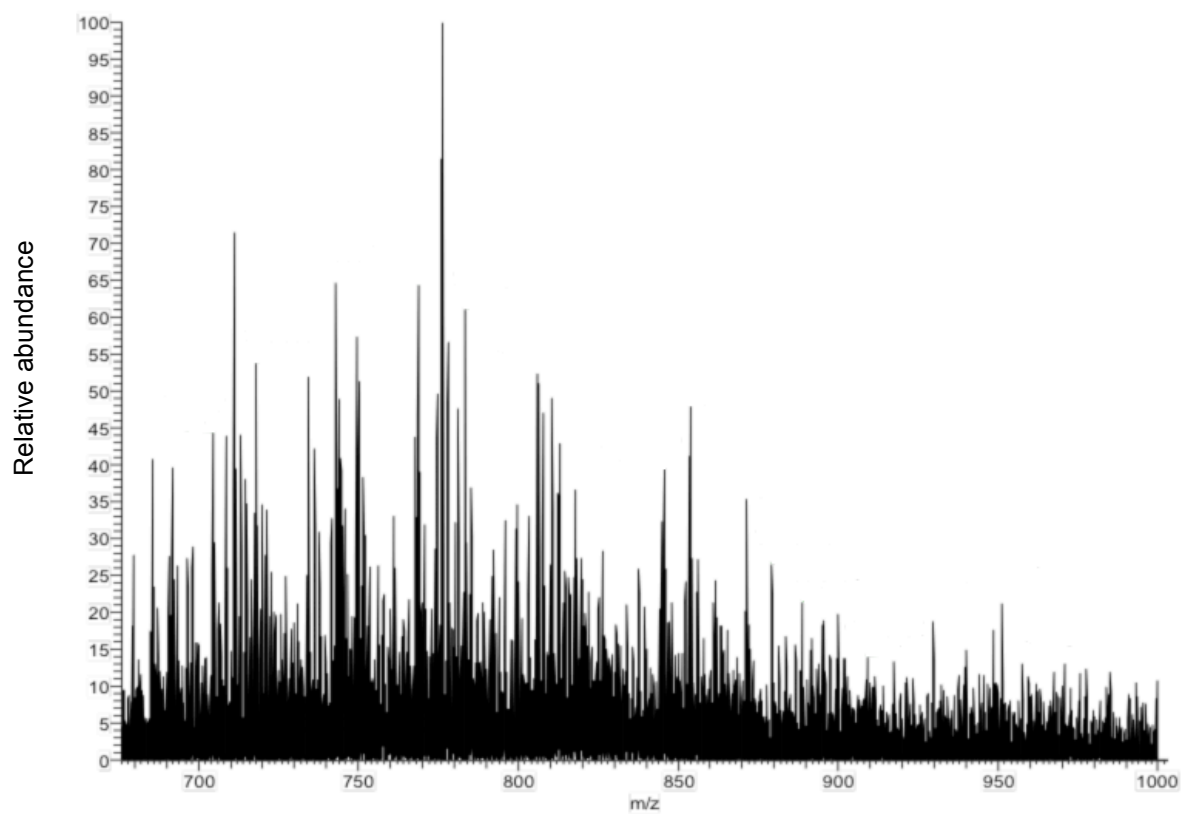

**Supplementary Figure 12.** FTMS of fraction 9.58 kDa (by PAGE) corresponding to 18 composition identifications listed in Supplementary Table 13.

| $m/z$    | $z$ | $M_{Exp}$ | $M_{Theor}$ | Accuracy (ppm) | Chain      |
|----------|-----|-----------|-------------|----------------|------------|
| 734.0053 | 11  | 8085.1444 | 8085.1448   | -0.1           | dp41-4-Ser |
| 741.2746 | 11  | 8165.1067 | 8165.0948   | 1.5            | dp41-5-Ser |
| 748.6348 | 11  | 8246.0689 | 8246.0527   | 2.0            | dp41-6-Ser |
| 704.2630 | 12  | 8463.2499 | 8463.2470   | 0.3            | dp43-4-Ser |
| 775.6491 | 11  | 8543.2262 | 8543.1970   | 3.4            | dp43-5-Ser |
| 717.6748 | 12  | 8624.1915 | 8624.1548   | 4.3            | dp43-6-Ser |
| 863.1251 | 10  | 8641.3293 | 8641.2947   | 4.0            | dp44-4-Ser |
| 871.1175 | 10  | 8721.2533 | 8721.2447   | 1.0            | dp44-5-Ser |
| 802.9348 | 11  | 8843.3689 | 8843.3648   | 0.5            | dp45-4-Ser |
| 742.6040 | 12  | 8923.3419 | 8923.3148   | 3.0            | dp45-5-Ser |
| 749.1837 | 12  | 9002.2983 | 9002.2570   | 4.6            | dp45-6-Ser |
| 767.4461 | 12  | 9221.4471 | 9221.4670   | -2.2           | dp47-4-Ser |
| 774.1947 | 12  | 9302.4303 | 9302.4248   | 0.6            | dp47-5-Ser |
| 780.8594 | 12  | 9382.4067 | 9382.3748   | 3.4            | dp47-6-Ser |
| 737.5744 | 13  | 9601.5689 | 9601.5848   | -1.7           | dp49-4-Ser |
| 805.7859 | 12  | 9681.5247 | 9681.5348   | -1.0           | dp49-5-Ser |
| 812.5344 | 12  | 9762.5067 | 9762.4927   | 1.4            | dp49-6-Ser |
| 895.2251 | 11  | 9858.5622 | 9858.5747   | -1.3           | dp50-5-Ser |

**Supplementary Table 13.** Accurate mass measurements for 18 compositions identified by FTMS of 9.58 kDa (by PAGE). Mass spectrum was acquired on the orbitrap FT mass spectrometer.

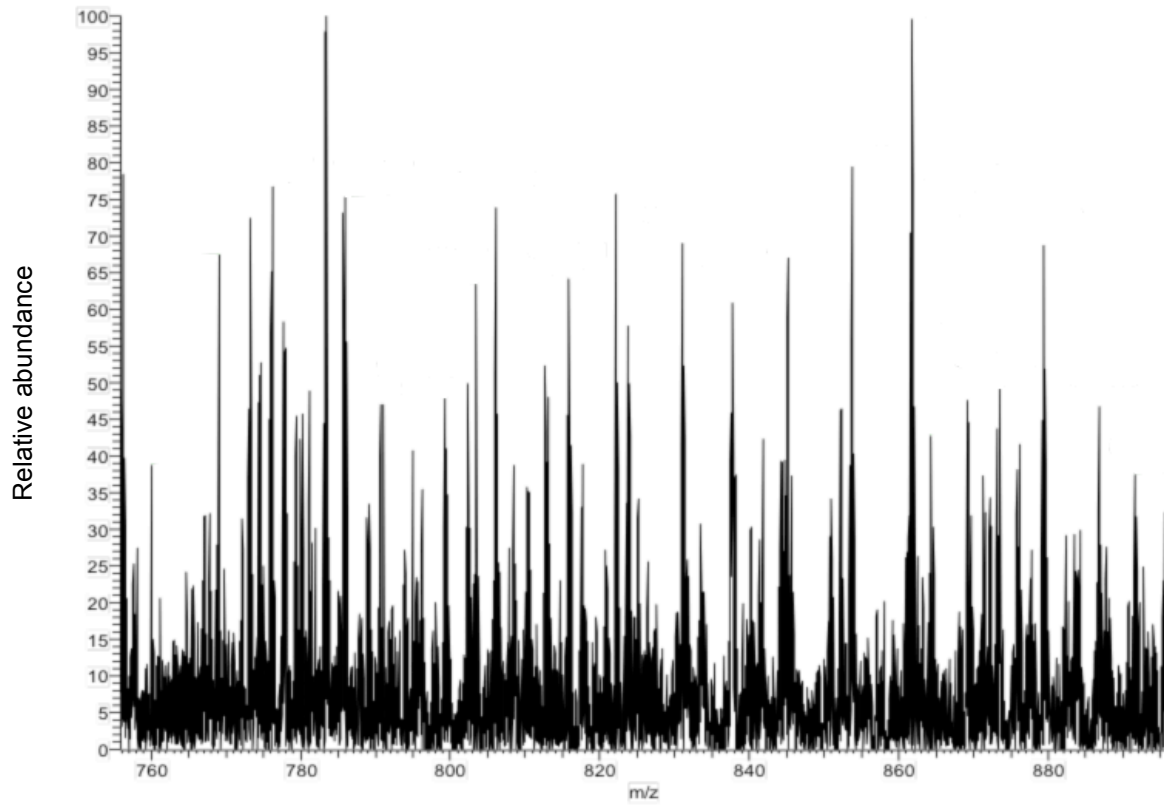

**Supplementary Figure 13.** FTMS of fraction 9.65 kDa (by PAGE) corresponding to 25 composition identifications listed in Supplementary Table 14.

| $m/z$    | $z$ | $M_{Exp}$  | $M_{Theor}$ | Accuracy (ppm) | Chain      |
|----------|-----|------------|-------------|----------------|------------|
| 830.7524 | 9   | 7485.8420  | 7485.8170   | 3.3            | dp37-6-Ser |
| 755.8747 | 10  | 7568.8253  | 7568.7905   | 4.6            | dp37-7-Ser |
| 864.2142 | 9   | 7786.9982  | 7786.9927   | 0.7            | dp39-5-Ser |
| 872.9875 | 9   | 7865.9579  | 7865.9348   | 2.9            | dp39-6-Ser |
| 785.5897 | 10  | 7865.9753  | 7865.9348   | 5.1            | dp39-6-Ser |
| 793.6863 | 10  | 7946.9413  | 7946.8927   | 6.1            | dp39-7-Ser |
| 815.4051 | 10  | 8164.1293  | 8164.0870   | 5.2            | dp41-5-Ser |
| 823.5031 | 10  | 8245.1093  | 8245.0478   | 7.4            | dp41-6-Ser |
| 833.1003 | 10  | 8341.0813  | 8341.1269   | -5.5           | dp42-5-Ser |
| 775.6450 | 11  | 8543.1811  | 8543.1970   | -1.9           | dp43-5-Ser |
| 853.4135 | 10  | 8544.2133  | 8544.2048   | 1.0            | dp43-5-Ser |
| 861.3097 | 10  | 8623.1753  | 8623.1470   | 3.3            | dp43-6-Ser |
| 790.2759 | 11  | 8704.1210  | 8704.1048   | 1.9            | dp43-7-Ser |
| 883.2233 | 10  | 8842.3113  | 8842.3570   | -5.2           | dp45-4-Ser |
| 891.2281 | 10  | 8922.3593  | 8922.3070   | 5.9            | dp45-5-Ser |
| 817.4731 | 11  | 9003.2902  | 9003.2648   | 2.8            | dp45-6-Ser |
| 774.1066 | 12  | 9301.3731  | 9301.4170   | -4.7           | dp47-5-Ser |
| 851.9390 | 11  | 9382.4151  | 9382.3748   | 4.3            | dp47-6-Ser |
| 871.8595 | 11  | 9601.5406  | 9601.5848   | -4.6           | dp49-4-Ser |
| 805.7017 | 12  | 9680.5143  | 9680.5270   | -1.3           | dp49-5-Ser |
| 886.4050 | 11  | 9761.5411  | 9761.4848   | 5.8            | dp49-6-Ser |
| 779.1193 | 13  | 10141.6526 | 10141.6027  | 4.9            | dp51-6-Ser |
| 862.4748 | 12  | 10361.7915 | 10361.8205  | -2.8           | dp53-4-Ser |
| 801.9744 | 13  | 10438.7689 | 10438.7470  | 2.1            | dp53-5-Ser |
| 808.2047 | 13  | 10519.7628 | 10519.7048  | 5.5            | dp53-6-Ser |
| 771.9138 | 14  | 10820.9028 | 10820.8805  | 2.1            | dp55-5-Ser |

**Supplementary Table 14.** Accurate mass measurements for 25 compositions identified by FTMS of 9.65 kDa (by PAGE). Mass spectrum was acquired on the orbitrap FT mass spectrometer.

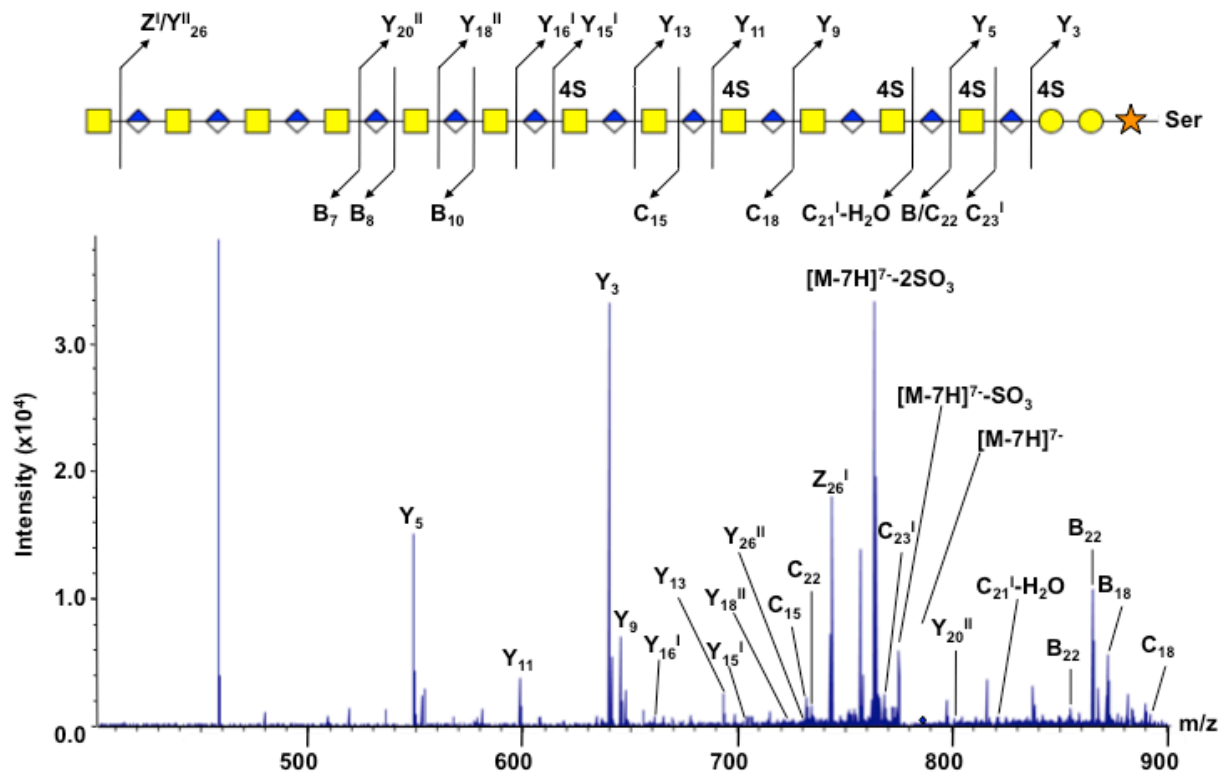

**Supplementary Figure 14.** Annotated spectra from CID-FTMS/MS in negative ion mode of UTI bikunin pG parent ion  $m/z$  786.18 ( $z = 7$ ) and its fragmentation pattern providing sequence for composition dp27-5-Ser. Fragment ions assigned in Supplementary Table 15. CID mass spectra were acquired on the orbitrap FT mass spectrometer. Observed fragment ions included  $C_n$ ,  $Z_n$ ,  $Y_n$  or  $B_n$  type.



| Cleavage                           | <i>m/z</i> | Relative Intensity | Ion                            | Accuracy (ppm) | <i>M</i> <sub>exp</sub> | <i>M</i> <sub>theor</sub> |
|------------------------------------|------------|--------------------|--------------------------------|----------------|-------------------------|---------------------------|
| B7                                 | 678.2048   | 1.59               | HexA3HexNAc4-B                 | 0.3            | 1358.4253               | 1358.4249                 |
| B8                                 | 757.2153   | 35                 | HexA4HexNAc4-B                 | 0.3            | 1516.4463               | 1516.4458                 |
| B10                                | 636.8481   | 1.15               | HexA5HexNAc5-B                 | -1.5           | 1913.5678               | 1913.5706                 |
| B18 <sup>I</sup>                   | 871.9817   | 7.13               | HexA9HexNAc9S1-B               | -0.5           | 3491.9581               | 3491.9600                 |
| B22 <sup>I</sup>                   | 865.0192   | 11.85              | HexA11HexNA11S2-B              | -1.1           | 4330.1351               | 4330.1397                 |
| B22 <sup>II</sup>                  | 849.0267   | 0.59               | HexA11HexNA11S1-B              | -2.4           | 4250.1726               | 4250.1829                 |
| C15                                | 733.1945   | 1.15               | HexA7HexNAc8S1-C               | -2.4           | 2936.8093               | 2936.8164                 |
| C18                                | 891.9718   | 0.88               | HexA9HexNAc9S2-C               | 0.5            | 3571.9185               | 3571.9168                 |
| C21 <sup>I</sup> -H <sub>2</sub> O | 820.8017   | 1.67               | HexA10HexNAc11S1-C             | -0.5           | 4109.0476               | 4109.0498                 |
| C22                                | 734.0065   | 1.95               | HexA11HexNA11S3-C              | -2.4           | 4410.0860               | 4410.0965                 |
| C23 <sup>I</sup>                   | 767.8521   | 1.62               | HexA11HexNA12S3-C              | -3.5           | 4613.1596               | 4613.1759                 |
| CY                                 | 458.0606   | 91.42              | HexA1HexNAc1S1                 | -0.9           | 459.0684                | 459.0688                  |
| CY                                 | 607.6377   | 1.54               | HexA3HexNAc3S1                 | -0.1           | 1217.2911               | 1217.2912                 |
| B3Y1 <sup>V</sup>                  | 860.8431   | 0.62               | Hex2HexA11HexNAc10             | -1.9           | 4309.2546               | 4309.2629                 |
| B4Y1 <sup>I</sup>                  | 738.1683   | 0.72               | Hex2HexA10HexNAc10S4           | 2.1            | 4435.0568               | 4435.0475                 |
| Y3                                 | 640.1395   | 84.36              | Y-Hex2Pen1S1-Ser               | -0.8           | 641.1473                | 641.1479                  |
| Y5                                 | 549.1001   | 40.06              | Y-Hex2HexA1HexNAc1Pen1S2-Ser   | -0.8           | 1100.2159               | 1100.2167                 |
| Y9                                 | 645.1238   | 19.94              | Y-Hex2HexA3HexNAc3Pen1S3-Ser   | -0.2           | 1938.3949               | 1938.3953                 |
| Y1 <sup>I</sup>                    | 598.3579   | 6.82               | Y-Hex2HexA4HexNAc4Pen1S4-Ser   | -0.3           | 2397.4629               | 2397.4636                 |
| Y13                                | 693.1347   | 6.76               | Y-Hex2HexA5HexNAc5Pen1S4-Ser   | -1.8           | 2776.5701               | 2776.5751                 |
| Y15 <sup>I</sup>                   | 705.9506   | 1.21               | Y-Hex2HexA6HexNAc6Pen1S4-Ser   | -1.7           | 3534.7921               | 3534.7980                 |
| Y16 <sup>I</sup>                   | 665.3348   | 1.87               | Y-Hex2HexA7HexNAc6Pen1S4-Ser   | -2.3           | 3331.7131               | 3331.7208                 |
| Y18 <sup>II</sup>                  | 725.3646   | 0.54               | Y-Hex2HexA8HexNAc7Pen1S3-Ser   | -6.0           | 3631.8621               | 3631.8838                 |
| Y20 <sup>II</sup>                  | 800.9877   | 0.48               | Y-Hex2HexA9HexNAc8Pen1S3-Ser   | -2.5           | 4009.9776               | 4009.9875                 |
| Y26 <sup>II</sup>                  | 731.7460   | 0.58               | Y-Hex2HexA12HexNAc11Pen1S3-Ser | -6.2           | 5129.2768               | 5129.3085                 |
| Z26 <sup>I</sup>                   | 743.1721   | 10.07              | Z-Hex2HexA12HexNAc11Pen1S4-Ser | -1.1           | 5209.2595               | 5209.2654                 |
| Y27 <sup>I</sup>                   | 774.7559   | 11.65              | Y-Hex2HexA12HexNAc12Pen1S4-Ser | -3.3           | 5430.3461               | 5430.3640                 |
| Y27 <sup>II</sup>                  | 763.3340   | 17.23              | Y-Hex2HexA12HexNAc12Pen1S3-Ser | -4.0           | 5350.3928               | 5350.4140                 |

**Supplementary Table 15.** Assignment of fragment ions resulted from CID of *m/z* 786.18 (*z* = 7) corresponding to composition dp27-5-Ser. CID mass spectra were acquired on the orbitrap FT mass spectrometer. Ion compositions for Tables S13-S34 are written as Hex#HexA#HexNAc#Pen#S#-AA, where Hex# is number of hexoses (Gal), HexA# is number of hexuronic acids (GlcA), HexNAc# is the number of *N*-acetyl-hexosamines (GalNAc), Pen# is the number of pentoses (Xyl), S# is the number of sulfo groups, and AA is the amino acid on the reducing end. B<sub>n</sub>, C<sub>n</sub>, Y<sub>n</sub>, and Z<sub>n</sub> ions were observed from FTMS whereas only B<sub>n</sub> and Y<sub>n</sub> ions were observed from FT-ICR MS.

| Cleavage | $m/z$     | Relative Intensity | Ion                          | Accuracy (ppm) | $m/z_{\text{theor}}$ | $z$ |
|----------|-----------|--------------------|------------------------------|----------------|----------------------|-----|
| B03      | 581.1830  | 5.45               | HexA1HexNAc2-B               | 1.0            | 581.1836             | 1   |
| B04      | 757.2148  | 20.46              | HexA2HexNAc2-B               | 1.1            | 757.2156             | 1   |
| B05      | 960.2947  | 5.18               | HexA2HexNAc3-B               | 0.3            | 960.2950             | 1   |
| B06      | 567.6595  | 0.23               | HexA3HexNAc3-B               | 0.7            | 567.6599             | 2   |
| B06      | 1136.3257 | 2.94               | HexA3HexNAc3-B               | 1.2            | 1136.3271            | 1   |
| B07      | 669.1994  | 1.25               | HexA3HexNAc4-B               | 0.3            | 669.1996             | 2   |
| B07      | 1339.4088 | 1.45               | HexA3HexNAc4-B               | -1.7           | 1339.4065            | 1   |
| B08      | 757.2148  | 20.46              | HexA4HexNAc4-B               | 1.1            | 757.2156             | 2   |
| B09      | 858.7547  | 1.02               | HexA4HexNAc5-B               | 0.7            | 858.7553             | 2   |
| B10      | 946.7711  | 4.49               | HexA5HexNAc5-B               | 0.3            | 946.7714             | 2   |
| B11      | 1048.3102 | 1.39               | HexA5HexNAc6-B               | 0.8            | 1048.3111            | 2   |
| B12      | 567.6595  | 0.23               | HexA6HexNAc6-B               | 0.7            | 567.6599             | 4   |
| B12      | 757.2148  | 20.46              | HexA6HexNAc6-B               | 1.1            | 757.2156             | 3   |
| B12      | 1136.3257 | 2.94               | HexA6HexNAc6-B               | 1.2            | 1136.3271            | 2   |
| B13      | 851.5608  | 0.45               | HexA6HexNAc7S1-B             | 0.3            | 851.5610             | 3   |
| B14      | 910.2375  | 0.93               | HexA7HexNAc7S1-B             | 1.0            | 910.2384             | 3   |
| B14      | 1365.8619 | 0.19               | HexA7HexNAc7S1-B             | -0.5           | 1365.8612            | 2   |
| B15      | 977.9313  | 0.50               | HexA7HexNAc8S1-B             | 0.2            | 977.9315             | 3   |
| B17      | 847.9640  | 0.38               | HexA8HexNAc9S2-B             | -0.1           | 847.9639             | 4   |
| B19      | 942.7411  | 1.12               | HexA9HexNAc10S2-B            | 0.7            | 942.7418             | 4   |
| B20      | 986.7489  | 0.28               | HexA10HexNAc10S2-B           | 0.9            | 986.7498             | 4   |
| B22      | 881.0108  | 0.72               | HexA11HexNAc11S3-B           | 1.4            | 881.0120             | 5   |
| B24      | 810.5200  | 0.53               | HexA12HexNAc12S4-B           | 0.2            | 810.5202             | 6   |
| B24      | 972.8247  | 0.14               | HexA12HexNAc12S4-B           | 1.0            | 972.8257             | 5   |
| B24      | 1216.2847 | 1.60               | HexA12HexNAc12S4-B           | -0.6           | 1216.2839            | 4   |
| Y03      | 640.1392  | 83.31              | Y-Hex2Pen1S1-Ser             | 1.3            | 640.1400             | 1   |
| Y04      | 816.1711  | 9.98               | Y-Hex2HexA1Pen1S1-Ser        | 1.2            | 816.1721             | 1   |
| Y05      | 549.1003  | 13.84              | Y-Hex2HexA1HexNAc1Pen1S2-Ser | 0.4            | 549.1005             | 2   |
| Y06      | 637.1159  | 0.99               | Y-Hex2HexA2HexNAc1Pen1S2-Ser | 1.0            | 637.1165             | 2   |
| Y08      | 577.4308  | 0.15               | Y-Hex2HexA3HexNAc2Pen1S3-Ser | 1.0            | 577.4314             | 3   |
| Y09      | 645.1240  | 6.66               | Y-Hex2HexA3HexNAc3Pen1S3-Ser | 0.8            | 645.1245             | 3   |
| Y10      | 703.8015  | 1.31               | Y-Hex2HexA4HexNAc3Pen1S3-Ser | 0.5            | 703.8019             | 3   |
| Y11      | 598.3586  | 1.52               | Y-Hex2HexA4HexNAc4Pen1S4-Ser | 0.0            | 598.3586             | 4   |
| Y13      | 693.1358  | 1.46               | Y-Hex2HexA5HexNAc5Pen1S4-Ser | 1.0            | 693.1365             | 4   |
| Y14      | 737.1436  | 0.15               | Y-Hex2HexA6HexNAc5Pen1S4-Ser | 1.2            | 737.1445             | 4   |

**Supplementary Table 16.** Assignment of fragment ions resulted from CID of parent ion  $m/z$  917.38 ( $z = 6$ ) corresponding to composition dp27-5-Ser. CID mass spectra were acquired on the Bruker FT-ICR mass spectrometer. The corresponding spectra is in Figure 3c.

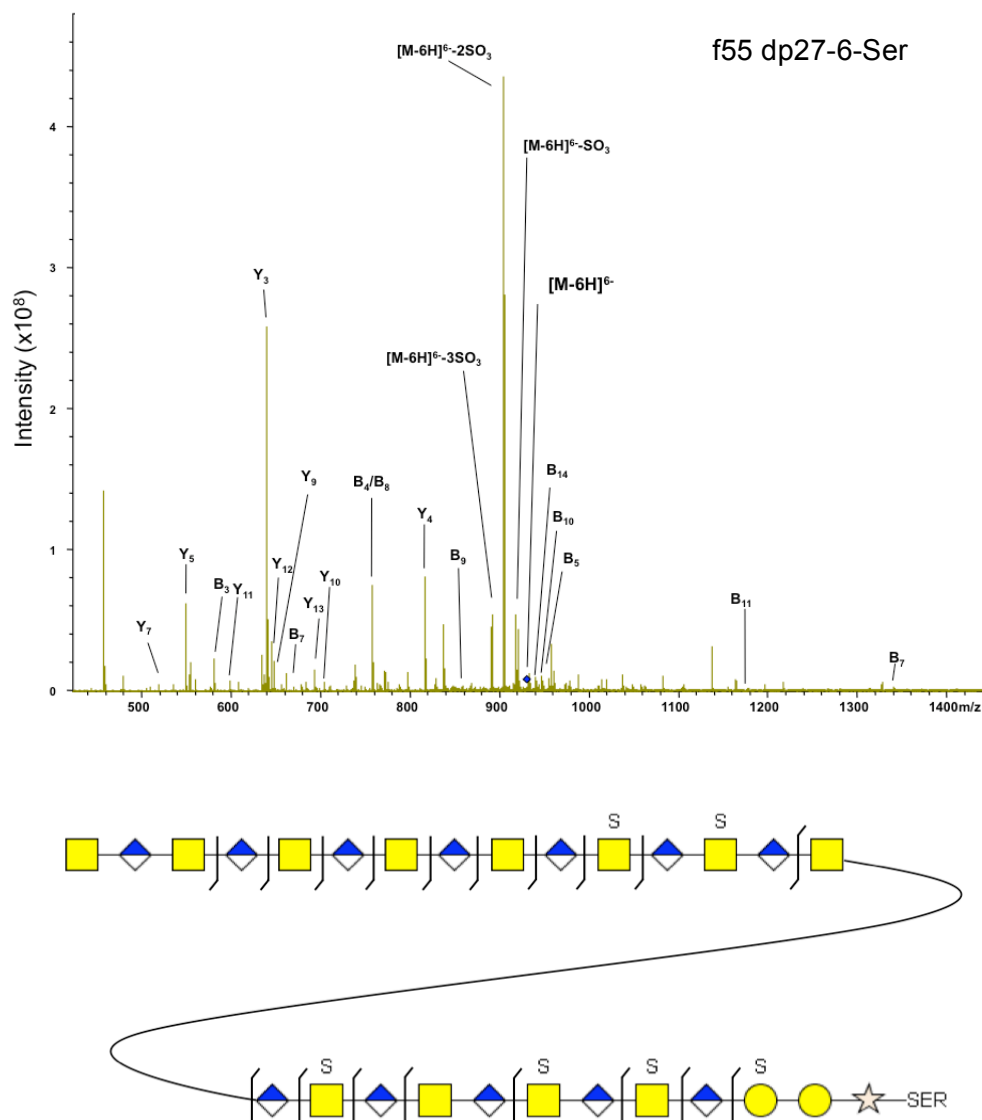

**Supplementary Figure 15.** Annotated spectra of CID-FT-ICR MS/MS in negative ion mode of UTI bikunin pG parent ion  $m/z$  930.70 ( $z = 6$ ) corresponding to composition dp27-6-Ser and its fragmentation showing sequence. Fragment ions assigned in Supplementary Table 17. All fragment ions were  $Y_n$  or  $B_n$  type.

| Cleavage | $m/z$     | Relative Intensity | Ion                          | Accuracy (ppm) | $m/z_{\text{theor}}$ | $z$ |
|----------|-----------|--------------------|------------------------------|----------------|----------------------|-----|
| B03      | 581.1832  | 5.65               | HexA1HexNAc2-B               | 0.6            | 581.1836             | 1   |
| B04      | 757.2148  | 17.57              | HexA2HexNAc2-B               | 1.1            | 757.2156             | 1   |
| B05      | 960.2949  | 3.39               | HexA2HexNAc3-B               | 0.1            | 960.2950             | 1   |
| B07      | 669.1992  | 0.78               | HexA3HexNAc4-B               | 0.6            | 669.1996             | 2   |
| B07      | 1339.4076 | 0.72               | HexA3HexNAc4-B               | -0.8           | 1339.4065            | 1   |
| B08      | 757.2148  | 17.57              | HexA4HexNAc4-B               | 1.1            | 757.2156             | 2   |
| B09      | 858.7543  | 0.65               | HexA4HexNAc5-B               | 1.2            | 858.7553             | 2   |
| B10      | 946.7715  | 2.08               | HexA5HexNAc5-B               | -0.1           | 946.7714             | 2   |
| B11      | 1176.3052 | 0.71               | HexA6HexNAc6S1-B             | 0.3            | 1176.3055            | 2   |
| B14      | 936.8905  | 0.46               | HexA7HexNAc7S2-B             | 0.2            | 936.8907             | 3   |
| Y03      | 640.1394  | 60.71              | Y-Hex2Pen1S1-Ser             | 1.0            | 640.1400             | 1   |
| Y04      | 816.1714  | 18.78              | Y-Hex2HexA1Pen1S1-Ser        | 0.9            | 816.1721             | 1   |
| Y05      | 549.1000  | 13.17              | Y-Hex2HexA1HexNAc1Pen1S2-Ser | 0.9            | 549.1005             | 2   |
| Y07      | 518.7537  | 0.84               | Y-Hex2HexA2HexNAc2Pen1S3-Ser | 0.6            | 518.7540             | 3   |
| Y09      | 645.1241  | 5.99               | Y-Hex2HexA3HexNAc3Pen1S3-Ser | 0.6            | 645.1245             | 3   |
| Y10      | 703.8012  | 1.32               | Y-Hex2HexA4HexNAc3Pen1S3-Ser | 0.9            | 703.8019             | 3   |
| Y11      | 598.3584  | 0.87               | Y-Hex2HexA4HexNAc4Pen1S4-Ser | 0.4            | 598.3586             | 4   |
| Y12      | 642.3661  | 0.77               | Y-Hex2HexA5HexNAc4Pen1S4-Ser | 0.8            | 642.3666             | 4   |
| Y13      | 693.1359  | 3.33               | Y-Hex2HexA5HexNAc5Pen1S4-Ser | 0.8            | 693.1365             | 4   |

**Supplementary Table 17.** Assignment of fragment ions resulted from CID of parent ion  $m/z$  930.70 ( $z = 6$ ) corresponding to composition dp27-6-Ser. CID mass spectra were acquired on the Bruker FT-ICR mass spectrometer.

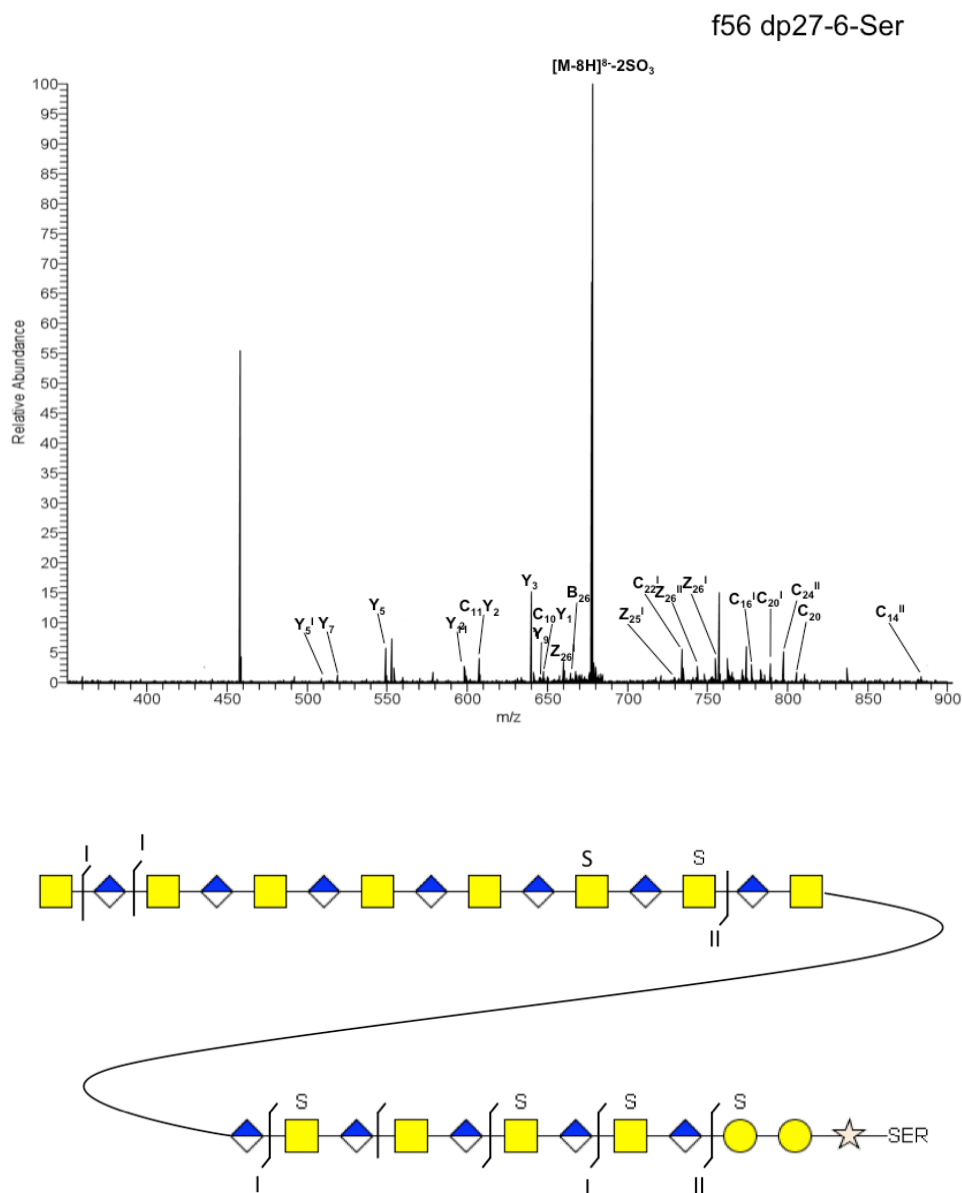

**Supplementary Figure 16.** Annotated spectra from CID-FTMS/MS in negative ion mode of UTI bikunin pG parent ion  $m/z$  697.78 ( $z = 8$ ) and its fragmentation pattern providing sequence for composition dp27-6-Ser. Fragment ions assigned in Supplementary Table 18. Observed fragment ions included  $C_n, Z_n, Y_n$  or  $B_n$  type.

| Cleavage          | <i>m/z</i> | Relative Intensity | Ion                            | Accuracy (ppm) | <i>M</i> <sub>exp</sub> | <i>M</i> <sub>theor</sub> |
|-------------------|------------|--------------------|--------------------------------|----------------|-------------------------|---------------------------|
| CY                | 458.0610   | 55.47              | HexA3HexNAc4S1                 | 1.2            | 459.0688                | 459.0683                  |
| C11Y22            | 607.6383   | 4.06               | HexA3HexNAc3S1                 | 0.9            | 1217.2923               | 1217.2912                 |
| C10Y11            | 647.6166   | 2.04               | HexA3HexNAc3S2                 | 0.6            | 1297.2489               | 1297.2480                 |
| C14 <sup>II</sup> | 883.5849   | 1.00               | HexA7HexNAc7-C                 | -0.8           | 2653.7782               | 2653.7802                 |
| C16 <sup>I</sup>  | 777.2045   | 3.12               | HexA8HexNAc8S1-C               | 0.3            | 3112.8493               | 3112.8485                 |
| C20 <sup>I</sup>  | 657.4976   | 1.16               | HexA10HexNAc10S2-C             | 1.1            | 3951.0326               | 3951.0282                 |
| C20 <sup>I</sup>  | 789.1983   | 1.64               | HexA10HexNAc10S2-C             | 0.6            | 3951.0306               | 3951.0282                 |
| C20               | 805.1896   | 0.48               | HexA10HexNAc10S3-C             | 0.5            | 4030.9871               | 4030.9851                 |
| C22 <sup>I</sup>  | 734.0072   | 1.69               | HexA11HexNAc11S3-C             | -1.4           | 4410.0902               | 4410.0965                 |
| C24 <sup>II</sup> | 797.1937   | 5.39               | HexA12HexNAc12S3-C             | 0.2            | 4789.2092               | 4789.2080                 |
| B26 <sup>I</sup>  | 667.2733   | 0.56               | HexA13HexNAc13-B               | 1.0            | 5346.2490               | 5346.2436                 |
| Y3                | 640.1399   | 15.52              | Y-Hex2Pen1S1-Ser               | 0.6            | 641.1477                | 641.1473                  |
| Y5 <sup>I</sup>   | 509.1221   | 0.77               | Y-Hex2HexA1HexNAc1Pen1S1-Ser   | 1.0            | 1020.2599               | 1020.2588                 |
| Y5                | 549.1003   | 6.05               | Y-Hex2HexA1HexNAc1Pen1S2-Ser   | 0.6            | 1100.2163               | 1100.2156                 |
| Y7                | 518.7533   | 1.40               | Y-Hex2HexA2HexNAc2Pen1S3-Ser   | -0.3           | 1559.2834               | 1559.2839                 |
| Y9                | 645.1246   | 1.02               | Y-Hex2HexA3HexNAc3Pen1S3-Ser   | 1.0            | 1938.3973               | 1938.3953                 |
| Y11 <sup>I</sup>  | 578.3693   | 1.79               | Y-Hex2HexA4HexNAc4Pen1S3-Ser   | 0.7            | 2317.5085               | 2317.5068                 |
| Y11               | 598.3580   | 2.86               | Y-Hex2HexA4HexNAc4Pen1S4-Ser   | -0.1           | 2397.4633               | 2397.4636                 |
| Z25 <sup>I</sup>  | 729.4451   | 0.95               | Z-Hex2HexA11HexNAc11Pen1S5-Ser | -4.2           | 5113.1705               | 5113.1919                 |
| Z26 <sup>II</sup> | 743.1725   | 0.95               | Z-Hex2HexA12HexNAc11Pen1S4-Ser | -0.6           | 5209.2623               | 5209.2654                 |
| Z26 <sup>I</sup>  | 660.1451   | 1.25               | Z-Hex2HexA12HexNAc11Pen1S5-Ser | 0.2            | 5289.2234               | 5289.2222                 |
| Z26 <sup>I</sup>  | 754.5948   | 3.16               | Z-Hex2HexA12HexNAc11Pen1S5-Ser | -0.7           | 5289.2184               | 5289.2222                 |
| Y27 <sup>II</sup> | 677.7868   | 31.44              | Y-Hex2HexA12HexNAc12Pen1S4-Ser | -1.3           | 5430.3570               | 5430.3640                 |

**Supplementary Table 18.** Assignment of fragment ions resulted from CID of parent ion *m/z* 697.78 (*z* = 8) corresponding to composition dp27-6-Ser. CID mass spectra were acquired on the orbitrap FT mass spectrometer.

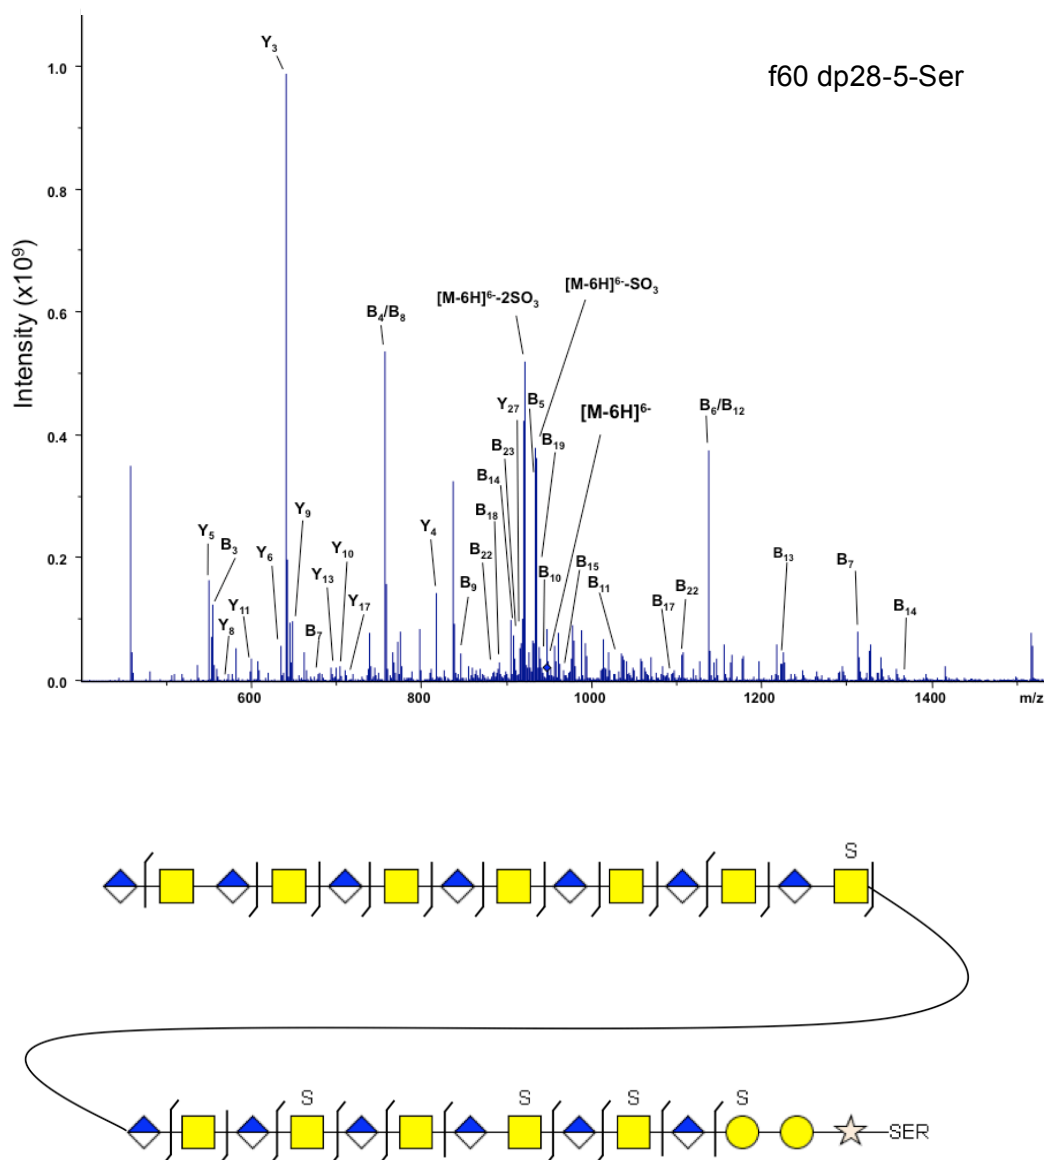

**Supplementary Figure 17.** Annotated spectra from CID-FT-ICR MS/MS negative ion mode of UTI bikunin pG parent ion  $m/z$  946.88 ( $z = 6$ ) and its fragmentation pattern providing sequence for composition dp28-5-Ser. Fragment ions assigned in Supplementary Table 19. All fragment ions were  $Y_n$  or  $B_n$  type.

| Cleavage | $m/z$     | Relative Intensity | Ion                            | Accuracy (ppm) | $m/z_{\text{theor}}$ | $z$ |
|----------|-----------|--------------------|--------------------------------|----------------|----------------------|-----|
| B03      | 554.1357  | 12.95              | HexA2HexNAc1-B                 | 1.0            | 554.1363             | 1   |
| B04      | 757.2151  | 54.34              | HexA2HexNAc2-B                 | 0.7            | 757.2156             | 1   |
| B06      | 1136.3271 | 24.26              | HexA3HexNAc3-B                 | 0.0            | 1136.3271            | 1   |
| B07      | 655.6754  | 0.73               | HexA4HexNAc3-B                 | 0.9            | 655.6760             | 2   |
| B07      | 1312.3586 | 7.58               | HexA4HexNAc3-B                 | 0.5            | 1312.3592            | 1   |
| B08      | 757.2151  | 54.34              | HexA4HexNAc4-B                 | 0.7            | 757.2156             | 2   |
| B09      | 845.2312  | 4.06               | HexA5HexNAc4-B                 | 0.6            | 845.2317             | 2   |
| B10      | 946.7712  | 7.67               | HexA5HexNAc5-B                 | 0.2            | 946.7714             | 2   |
| B11      | 1034.7873 | 4.52               | HexA6HexNAc5-B                 | 0.1            | 1034.7874            | 2   |
| B12      | 1136.3271 | 24.26              | HexA6HexNAc6-B                 | 0.0            | 1136.3271            | 2   |
| B13      | 1224.3432 | 5.22               | HexA7HexNAc6-B                 | 0.0            | 1224.3431            | 2   |
| B14      | 910.2374  | 1.51               | HexA7HexNAc7S1-B               | 1.1            | 910.2384             | 3   |
| B14      | 1365.8614 | 1.17               | HexA7HexNAc7S1-B               | -0.1           | 1365.8612            | 2   |
| B15      | 968.9153  | 0.94               | HexA8HexNAc7S1-B               | 0.5            | 968.9158             | 3   |
| B16      | 1036.6087 | 3.47               | HexA8HexNAc8S1-B               | 0.2            | 1036.6089            | 3   |
| B17      | 1095.2859 | 1.76               | HexA9HexNAc8S1-B               | 0.3            | 1095.2863            | 3   |
| B18      | 891.9707  | 0.99               | HexA9HexNAc9S2-B               | 1.4            | 891.9719             | 4   |
| B19      | 935.9795  | 0.40               | HexA10HexNAc9S2-B              | 0.5            | 935.9799             | 4   |
| B22      | 881.0113  | 0.80               | HexA11HexNAc11S3-B             | 0.8            | 881.0120             | 5   |
| B22      | 1101.5164 | 0.76               | HexA11HexNAc11S3-B             | 0.4            | 1101.5169            | 4   |
| B23      | 916.2178  | 0.63               | HexA12HexNAc11S3-B             | 0.7            | 916.2184             | 5   |
| B5       | 933.2473  | 14.25              | HexA3HexNAc2-B                 | 0.5            | 933.2477             | 1   |
| Y03      | 640.1394  | 100.00             | Y-Hex2Pen1S1-Ser               | 1.0            | 640.1400             | 1   |
| Y04      | 816.1716  | 14.27              | Y-Hex2HexA1Pen1S1-Ser          | 0.6            | 816.1721             | 1   |
| Y05      | 549.1001  | 15.49              | Y-Hex2HexA1HexNAc1Pen1S2-Ser   | 0.7            | 549.1005             | 2   |
| Y06      | 637.1161  | 1.15               | Y-Hex2HexA2HexNAc1Pen1S2-Ser   | 0.7            | 637.1165             | 2   |
| Y08      | 577.4310  | 0.42               | Y-Hex2HexA3HexNAc2Pen1S2-Ser   | -0.2           | 577.4309             | 3   |
| Y09      | 645.1241  | 8.16               | Y-Hex2HexA3HexNAc3Pen1S3-Ser   | 0.6            | 645.1245             | 3   |
| Y10      | 703.8016  | 2.21               | Y-Hex2HexA4HexNAc3Pen1S3-Ser   | 0.4            | 703.8019             | 3   |
| Y11      | 598.3576  | 1.58               | Y-Hex2HexA4HexNAc4Pen1S4-Ser   | 1.7            | 598.3586             | 4   |
| Y13      | 693.1359  | 2.25               | Y-Hex2HexA5HexNAc5Pen1S4-Ser   | 0.8            | 693.1365             | 4   |
| Y17      | 721.9424  | 0.31               | Y-Hex2HexA7HexNAc7Pen1S5-Ser   | 1.8            | 721.9437             | 5   |
| Y27      | 917.3771  | 10.34              | Y-Hex2HexA12HexNAc12Pen1S5-Ser | 1.1            | 917.3781             | 6   |

**Supplementary Table 19.** Assignment of fragment ions resulted from CID of parent ion  $m/z$  946.88 ( $z = 6$ ) corresponding to composition dp28-5-Ser. CID mass spectra were acquired on the Bruker FT-ICR mass spectrometer.



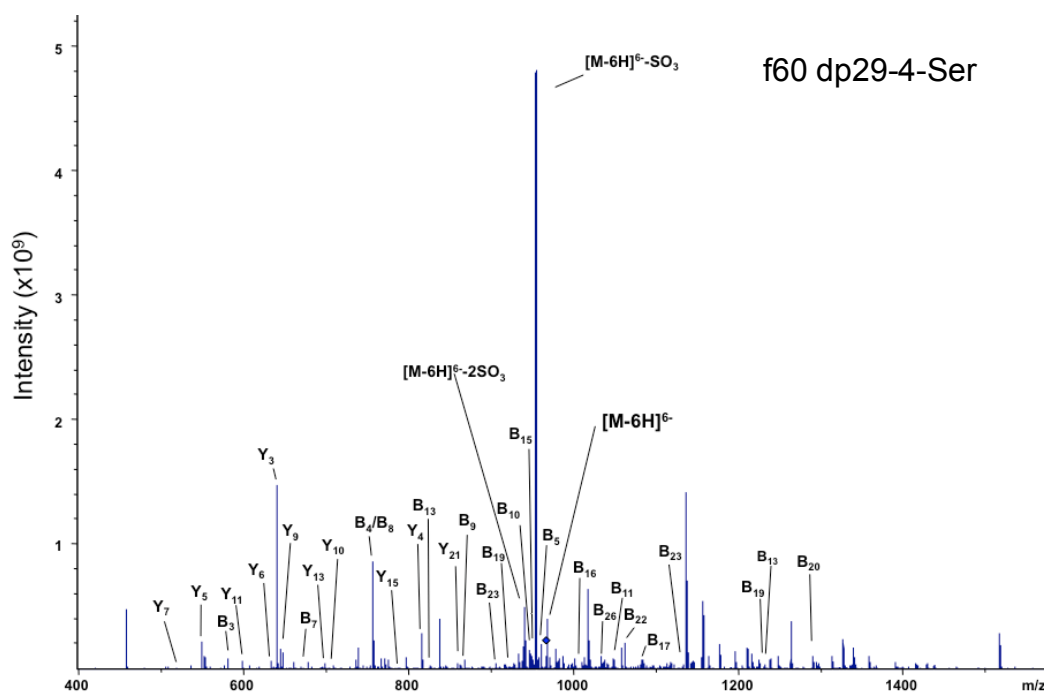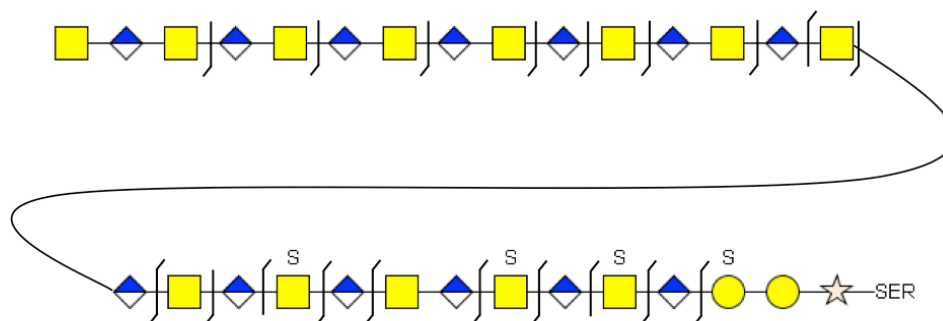

**Supplementary Figure 18.** Annotated spectra from CID-FT-ICR MS/MS in negative ion mode of UTI bikunin pG parent ion  $m/z$  967.24 ( $z = 6$ ) and its fragmentation pattern providing sequence for composition dp29-4-Ser. Fragment ions assigned in Supplementary Table 20. All fragment ions were Y<sub>n</sub> or B<sub>n</sub> type.

| Cleavage | $m/z$     | Relative Intensity | Ion                          | Accuracy (ppm) | $m/z_{\text{theor}}$ | $z$ |
|----------|-----------|--------------------|------------------------------|----------------|----------------------|-----|
| B03      | 581.1838  | 1.87               | HexA1HexNAc2-B               | -0.4           | 581.1836             | 1   |
| B04      | 757.2150  | 18.92              | HexA2HexNAc2-B               | 0.9            | 757.2156             | 1   |
| B05      | 960.2941  | 4.03               | HexA2HexNAc3-B               | 1.0            | 960.2950             | 1   |
| B07      | 669.1991  | 0.44               | HexA3HexNAc4-B               | 0.7            | 669.1996             | 2   |
| B08      | 757.2150  | 18.92              | HexA4HexNAc4-B               | 0.9            | 757.2156             | 2   |
| B09      | 858.7544  | 0.98               | HexA4HexNAc5-B               | 1.1            | 858.7553             | 2   |
| B10      | 946.7710  | 2.94               | HexA5HexNAc5-B               | 0.4            | 946.7714             | 2   |
| B11      | 1048.3113 | 1.80               | HexA5HexNAc6-B               | -0.2           | 1048.3111            | 2   |
| B13      | 824.9079  | 0.26               | HexA6HexNAc7-B               | 1.1            | 824.9088             | 3   |
| B13      | 1237.8671 | 1.83               | HexA6HexNAc7-B               | -0.2           | 1237.8668            | 2   |
| B15      | 951.2784  | 0.46               | HexA7HexNAc8-B               | 0.9            | 951.2793             | 3   |
| B16      | 1009.9564 | 1.27               | HexA8HexNAc8-B               | 0.2            | 1009.9566            | 3   |
| B17      | 1077.6491 | 0.65               | HexA8HexNAc9-B               | 0.6            | 1077.6497            | 3   |
| B19      | 922.7513  | 0.34               | HexA9HexNAc10S1-B            | 1.4            | 922.7526             | 4   |
| B19      | 1230.6744 | 0.81               | HexA9HexNAc10S1-B            | -1.5           | 1230.6725            | 3   |
| B20      | 1289.3513 | 2.12               | HexA10HexNAc10S1-B           | -1.1           | 1289.3499            | 3   |
| B22      | 1061.5387 | 4.39               | HexA11HexNAc11S1-B           | -0.2           | 1061.5384            | 4   |
| B23      | 905.6352  | 1.01               | HexA11HexNAc12S2-B           | 1.5            | 905.6365             | 5   |
| B23      | 1132.2974 | 0.82               | HexA11HexNAc12S2-B           | 0.1            | 1132.2975            | 4   |
| B26      | 1032.6558 | 2.25               | HexA13HexNAc13S3-B           | 0.8            | 1032.6566            | 5   |
| Y03      | 640.1396  | 32.21              | Y-Hex2Pen1S1-Ser             | 0.6            | 640.1400             | 1   |
| Y04      | 816.1709  | 5.80               | Y-Hex2HexA1Pen1S1-Ser        | 1.5            | 816.1721             | 1   |
| Y05      | 549.1011  | 4.31               | Y-Hex2HexA1HexNAc1Pen1S2-Ser | -1.1           | 549.1005             | 2   |
| Y06      | 637.1165  | 0.43               | Y-Hex2HexA2HexNAc1Pen1S2-Ser | 0.1            | 637.1165             | 2   |
| Y07      | 518.7549  | 0.17               | Y-Hex2HexA2HexNAc2Pen1S3-Ser | -1.7           | 518.7540             | 3   |
| Y09      | 645.1245  | 2.81               | Y-Hex2HexA3HexNAc3Pen1S3-Ser | 0.0            | 645.1245             | 3   |
| Y10      | 703.8014  | 0.18               | Y-Hex2HexA4HexNAc3Pen1S3-Ser | 0.6            | 703.8019             | 3   |
| Y11      | 598.3587  | 0.13               | Y-Hex2HexA4HexNAc4Pen1S4-Ser | -0.1           | 598.3586             | 4   |
| Y13      | 693.1360  | 0.26               | Y-Hex2HexA5HexNAc5Pen1S4-Ser | 0.7            | 693.1365             | 4   |
| Y15      | 787.9136  | 0.15               | Y-Hex2HexA6HexNAc6Pen1S4-Ser | 0.9            | 787.9143             | 4   |
| Y21      | 857.5959  | 0.09               | Y-Hex2HexA9HexNAc9Pen1S4-Ser | 1.2            | 857.5969             | 5   |

**Supplementary Table 20.** Assignment of fragment ions resulted from CID of parent ion  $m/z$  967.24 ( $z = 6$ ) corresponding to composition dp29-4-Ser. CID mass spectra were acquired on the Bruker FT-ICR mass spectrometer.

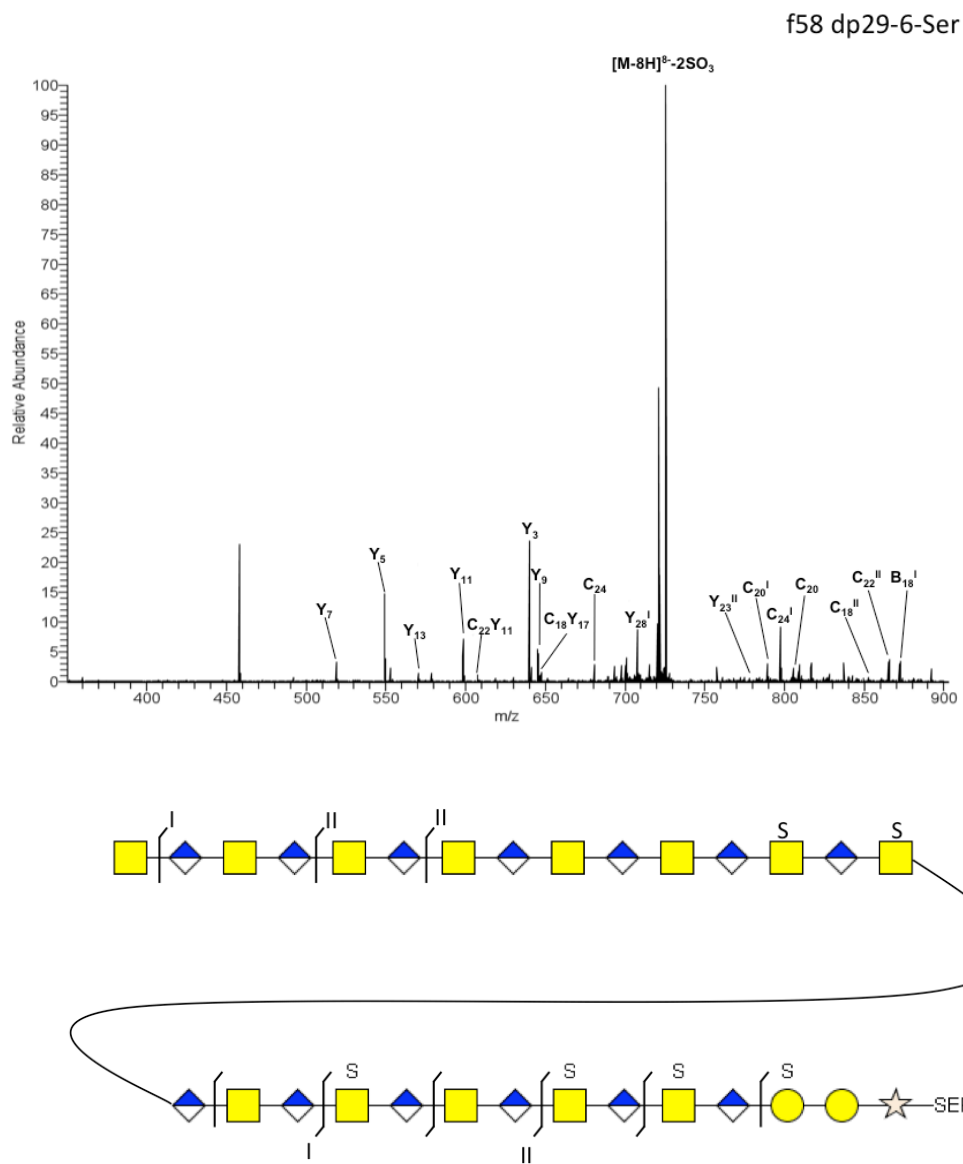

**Supplementary Figure 19.** Annotated spectra from CID-FTMS/MS in negative ion mode of UTI bikunin pG parent ion  $m/z$  745.16 ( $z = 8$ ) and its fragmentation pattern providing sequence for composition dp29-6-Ser. Fragment ions assigned in Supplementary Table 21. Observed fragment ions included  $C_n$ ,  $Z_n$ ,  $Y_n$  or  $B_n$  type.

| Cleavage           | <i>m/z</i> | Relative Intensity | Ion                            | Accuracy (ppm) | $M_{\text{exp}}$ | $M_{\text{theor}}$ |
|--------------------|------------|--------------------|--------------------------------|----------------|------------------|--------------------|
| CY                 | 458.0610   | 23.04              | HexA1HexNAc1S1                 | 1.2            | 459.0688         | 459.0683           |
| B22Y21             | 607.6382   | 1.22               | HexA3HexNAc3S1                 | 0.7            | 1217.2921        | 1217.2912          |
| C18Y17             | 647.6166   | 1.68               | HexA3HexNAc3S2                 | 0.6            | 1297.2489        | 1297.2480          |
| C18 <sup>II</sup>  | 851.9982   | 0.23               | HexA9HexNAc9-C                 | 6.1            | 3412.0241        | 3412.0031          |
| B18 <sup>I</sup>   | 871.9815   | 2.69               | HexA9HexNAc9S1-B               | -0.8           | 3491.9573        | 3491.9600          |
| C20 <sup>I</sup>   | 789.1962   | 0.24               | HexA10HexNAc10S2-C             | -2.1           | 3951.0201        | 3951.0282          |
| C20                | 805.1893   | 0.79               | HexA10HexNAc10S3-C             | 0.1            | 4030.9856        | 4030.9851          |
| C22 <sup>II</sup>  | 865.0189   | 0.53               | HexA11HexNAc11S2-C             | -1.4           | 4330.1336        | 4330.1397          |
| C24 <sup>I</sup>   | 797.1934   | 5.69               | HexA12HexNAc12S3-C             | -0.1           | 4789.2074        | 4789.2080          |
| C24                | 689.0156   | 0.32               | HexA12HexNAc12S4-C             | 2.1            | 4830.1640        | 4830.1539          |
| Y3                 | 640.1401   | 24.36              | Y-Hex2Pen1S1-Ser               | 1.0            | 641.1479         | 641.1473           |
| Y5                 | 549.1005   | 15.19              | Y-Hex2HexA1HexNAc1Pen1S2-Ser   | 0.0            | 1100.2167        | 1100.2167          |
| Y7                 | 518.7539   | 3.38               | Y-Hex2HexA2HexNAc2Pen1S3-Ser   | 0.8            | 1559.2852        | 1559.2839          |
| Y9                 | 645.1240   | 5.6                | Y-Hex2HexA3HexNAc3Pen1S3-Ser   | 0.1            | 1938.3955        | 1938.3953          |
| Y11 <sup>I</sup>   | 578.3689   | 0.52               | Y-Hex2HexA4HexNAc4Pen1S3-Ser   | 0.0            | 2317.5069        | 2317.5068          |
| Y11                | 598.3584   | 4.73               | Y-Hex2HexA4HexNAc4Pen1S4-Ser   | 0.5            | 2397.4649        | 2397.4636          |
| Y13                | 570.2988   | 1.49               | Y-Hex2HexA5HexNAc5Pen1S4-Ser   | 0.4            | 2856.5331        | 2856.5319          |
| Y23 <sup>II</sup>  | 777.6795   | 0.25               | Y-Hex2HexA10HexNAc10Pen1S4-Ser | -3.6           | 4672.1240        | 4672.1410          |
| Y25 <sup>III</sup> | 709.1740   | 0.8                | Y-Hex2HexA11HexNAc11Pen1S3-Ser | -6.0           | 4971.2728        | 4971.3025          |
| Y25 <sup>II</sup>  | 720.5986   | 10.14              | Y-Hex2HexA11HexNAc11Pen1S4-Ser | -1.5           | 5051.2450        | 5051.2525          |
| Y28 <sup>I</sup>   | 707.5343   | 1.14               | Y-Hex2HexA13HexNAc12Pen1S5-Ser | 0.6            | 5668.3370        | 5668.3336          |
| Y29 <sup>II</sup>  | 725.1756   | 21.66              | Y-Hex2HexA13HexNAc13Pen1S4-Ser | -1.4           | 5809.4674        | 5809.4755          |

**Supplementary Table 21.** Assignment of fragment ions resulted from CID of parent ion *m/z* 745.16 ( $z = 8$ ) corresponding to composition dp29-6-Ser. CID mass spectra were acquired on the orbitrap FT mass spectrometer.

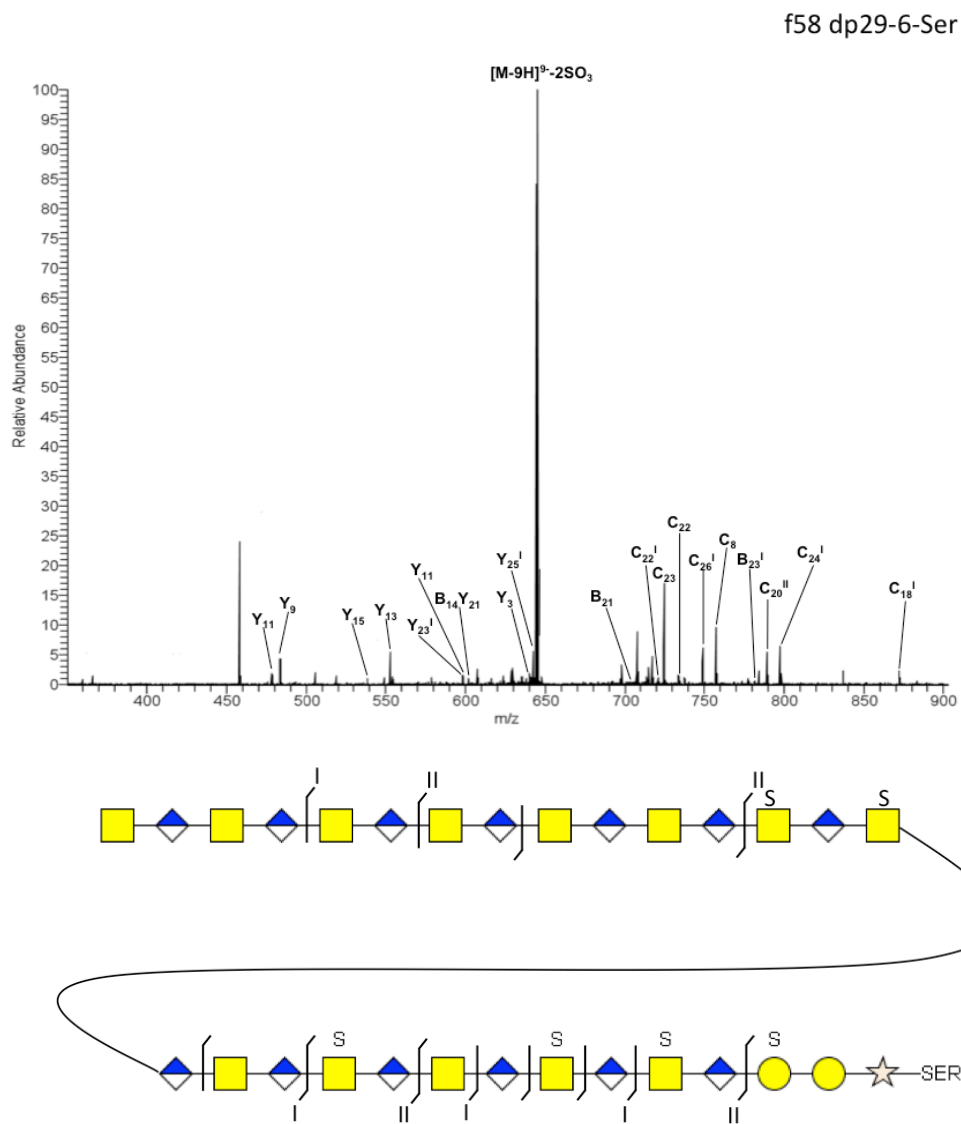

**Supplementary Figure 20.** Annotated spectra from CID-FTMS/MS in negative ion mode of UTI bikunin pG parent ion  $m/z$  662.26 ( $z = 9$ ) and its fragmentation pattern providing sequence for composition dp 29-6-Ser. Fragment ions assigned in Supplementary Table 22. Observed fragment ions included C<sub>n</sub>, Z<sub>n</sub>, Y<sub>n</sub> or B<sub>n</sub> type.

| Cleavage          | <i>m/z</i> | Relative Intensity | Ion                            | Accuracy (ppm) | <i>M</i> <sub>exp</sub> | <i>M</i> <sub>theor</sub> | <i>z</i> |
|-------------------|------------|--------------------|--------------------------------|----------------|-------------------------|---------------------------|----------|
| CY                | 458.0611   | 23.97              | HexA1HexNAc1S1                 | 1.4            | 459.0689                | 459.0683                  | 1        |
| B14Y21            | 607.6385   | 2.63               | HexA3HexNAc3S1                 | 1.2            | 1217.2927               | 1217.2912                 | 2        |
| C8                | 757.2158   | 9.92               | HexA4HexNAc-C                  | 0.9            | 1516.4473               | 1516.4458                 | 2        |
| C18 <sup>I</sup>  | 871.9818   | 0.82               | HexA9HexNAc9S1-C               | -0.4           | 3491.9585               | 3491.9600                 | 4        |
| C20 <sup>II</sup> | 789.1983   | 2.88               | HexA10HexNAc10S2-C             | 0.6            | 3951.0306               | 3951.0282                 | 5        |
| B21               | 704.6683   | 0.33               | HexA10HexNAc11S3-B             | -1.8           | 4234.0568               | 4234.0644                 | 6        |
| C22 <sup>I</sup>  | 720.6806   | 0.19               | HexA11HexNAc11S2-C             | -2.1           | 4330.1306               | 4330.1397                 | 6        |
| C22               | 734.0083   | 0.44               | HexA11HexNAc11S3-C             | 0.1            | 4410.0968               | 4410.0965                 | 6        |
| C23               | 723.6012   | 0.18               | HexA11HexNAc12S4-C             | 3.7            | 5072.2632               | 5072.2442                 | 7        |
| C24 <sup>I</sup>  | 797.1939   | 1.33               | HexA12HexNAc12S3-C             | 0.5            | 4789.2104               | 4789.2080                 | 6        |
| C26 <sup>II</sup> | 748.7462   | 1.32               | HexA13HexNAc13S4-C             | 0.4            | 5248.2782               | 5248.2763                 | 7        |
| Y3                | 640.1402   | 2.06               | Y-Hex2Pen1S1-Ser               | 1.1            | 641.1480                | 641.1473                  | 1        |
| Y9                | 483.5914   | 4.52               | Y-Hex2HexA3HexNAc3Pen1S3-Ser   | 0.8            | 1938.3969               | 1938.3953                 | 4        |
| Y11 <sup>I</sup>  | 578.3689   | 0.76               | Y-Hex2HexA4HexNAc4Pen1S3-Ser   | 0.0            | 2317.5069               | 2317.5068                 | 4        |
| Y11               | 478.4849   | 1.94               | Y-Hex2HexA4HexNAc4Pen1S4-Ser   | 0.0            | 2397.4636               | 2397.4636                 | 5        |
| Y11               | 598.3587   | 1.74               | Y-Hex2HexA4HexNAc4Pen1S4-Ser   | 1.0            | 2397.4661               | 2397.4636                 | 4        |
| Y13               | 554.3074   | 1.05               | Y-Hex2HexA5HexNAc5Pen1S4-Ser   | -2.7           | 2776.5761               | 2776.5835                 | 5        |
| Y15               | 538.2665   | 0.5                | Y-Hex2HexA6HexNAc6Pen1S4-Ser   | 0.3            | 3235.6460               | 3235.6450                 | 6        |
| Y23 <sup>II</sup> | 781.3475   | 0.48               | Y-Hex2HexA10HexNAc10Pen1S4-Ser | 1.9            | 4694.1320               | 4694.1230                 | 6        |
| Y23 <sup>I</sup>  | 593.0026   | 0.27               | Y-Hex2HexA10HexNAc10Pen1S5-Ser | -1.6           | 4752.0834               | 4752.0910                 | 8        |
| Y25 <sup>I</sup>  | 640.3947   | 0.21               | Y-Hex2HexA11HexNAc11Pen1S5-Ser | 3.4            | 5131.2202               | 5131.2025                 | 8        |
| Y29 <sup>II</sup> | 644.4885   | 15.53              | Y-Hex2HexA13HexNAc13Pen1S4-Ser | -1.5           | 5809.4669               | 5809.4755                 | 9        |

**Supplementary Table 22.** Assignment of fragment ions resulted from CID of parent ion *m/z* 662.26 (*z* = 9) corresponding to composition dp29-6-Ser. CID mass spectra were acquired on the orbitrap FT mass spectrometer.

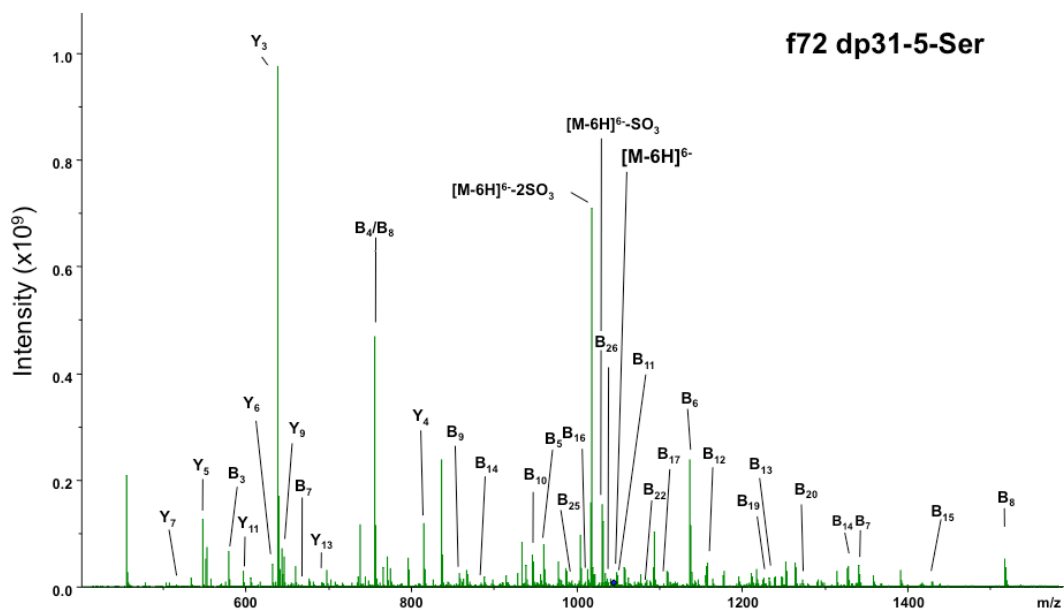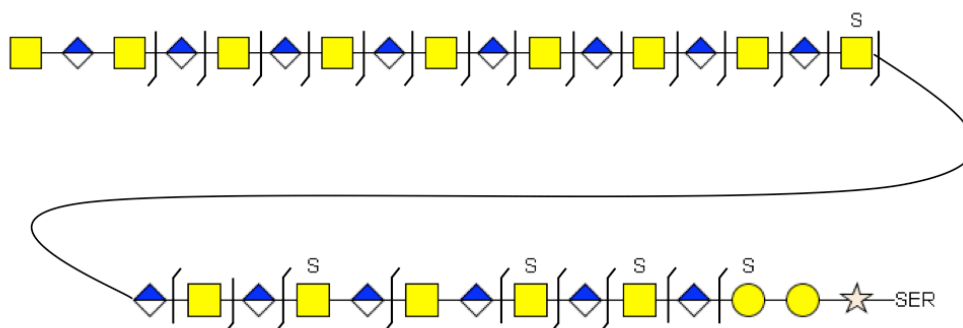

**Supplementary Figure 21.** Annotated spectra from CID-FT-ICR MS/MS negative ion mode of UTI bikunin pG parent ion  $m/z$  1043.74 ( $z = 6$ ) and its fragmentation pattern providing sequence for composition dp31-5-Ser. Fragment ions assigned in Supplementary Table 23. All fragment ions were  $Y_n$  or  $B_n$  type.

| Cleavage | $m/z$     | Relative Intensity | Ion                          | Accuracy (ppm) | $m/z_{\text{theor}}$ | $z$ |
|----------|-----------|--------------------|------------------------------|----------------|----------------------|-----|
| B03      | 581.1831  | 7.01               | HexA1HexNAc2-B               | 0.8            | 581.1836             | 1   |
| B04      | 757.2147  | 47.59              | HexA2HexNAc2-B               | 1.2            | 757.2156             | 1   |
| B05      | 960.2945  | 8.20               | HexA2HexNAc3-B               | 0.5            | 960.2950             | 1   |
| B06      | 1136.3271 | 15.99              | HexA3HexNAc3-B               | 0.0            | 1136.3271            | 1   |
| B07      | 669.1991  | 0.42               | HexA3HexNAc4-B               | 0.7            | 669.1996             | 2   |
| B07      | 1339.4073 | 4.10               | HexA3HexNAc4-B               | -0.6           | 1339.4065            | 1   |
| B08      | 757.2147  | 47.59              | HexA4HexNAc4-B               | 1.2            | 757.2156             | 2   |
| B08      | 1515.4405 | 5.08               | HexA4HexNAc4-B               | -1.3           | 1515.4386            | 1   |
| B09      | 858.7550  | 2.22               | HexA4HexNAc5-B               | 0.4            | 858.7553             | 2   |
| B10      | 946.7715  | 5.43               | HexA5HexNAc5-B               | -0.1           | 946.7714             | 2   |
| B11      | 1048.3109 | 2.56               | HexA5HexNAc6-B               | 0.2            | 1048.3111            | 2   |
| B12      | 1136.3271 | 15.99              | HexA6HexNAc6-B               | 0.0            | 1136.3271            | 2   |
| B13      | 1237.8674 | 2.06               | HexA6HexNAc7-B               | -0.5           | 1237.8668            | 2   |
| B14      | 883.5869  | 0.21               | HexA7HexNAc7-B               | -0.9           | 883.5861             | 3   |
| B14      | 1325.8837 | 4.12               | HexA7HexNAc7-B               | -0.7           | 1325.8828            | 2   |
| B15      | 1427.4243 | 1.12               | HexA7HexNAc8-B               | -1.2           | 1427.4225            | 2   |
| B16      | 1009.9562 | 0.89               | HexA8HexNAc8-B               | 0.4            | 1009.9566            | 3   |
| B17      | 1104.3021 | 0.48               | HexA8HexNAc9S1-B             | -0.1           | 1104.3020            | 3   |
| B19      | 1230.6724 | 0.33               | HexA9HexNAc10S1-B            | 0.1            | 1230.6725            | 3   |
| B20      | 1289.3504 | 1.57               | HexA10HexNAc10S1-B           | -0.4           | 1289.3499            | 3   |
| B22      | 1081.5278 | 0.69               | HexA11HexNAc11S2-B           | -0.1           | 1081.5276            | 4   |
| B25      | 997.4502  | 0.52               | HexA12HexNAc13S3-B           | 0.0            | 997.4502             | 5   |
| B26      | 1032.6563 | 0.66               | HexA13HexNAc13S3-B           | 0.3            | 1032.6566            | 5   |
| Y03      | 640.1394  | 100.00             | Y-Hex2Pen1S1-Ser             | 1.0            | 640.1400             | 1   |
| Y04      | 816.1715  | 12.01              | Y-Hex2HexA1Pen1S1-Ser        | 0.7            | 816.1721             | 1   |
| Y05      | 549.1001  | 12.00              | Y-Hex2HexA1HexNAc1Pen1S2-Ser | 0.7            | 549.1005             | 2   |
| Y06      | 637.1162  | 0.88               | Y-Hex2HexA2HexNAc1Pen1S2-Ser | 0.5            | 637.1165             | 2   |
| Y07      | 518.7537  | 0.28               | Y-Hex2HexA2HexNAc2Pen1S3-Ser | 0.6            | 518.7540             | 3   |
| Y09      | 645.1242  | 6.32               | Y-Hex2HexA3HexNAc3Pen1S3-Ser | 0.4            | 645.1245             | 3   |
| Y11      | 598.3582  | 0.41               | Y-Hex2HexA4HexNAc4Pen1S4-Ser | 0.7            | 598.3586             | 4   |
| Y13      | 693.1355  | 0.82               | Y-Hex2HexA5HexNAc5Pen1S4-Ser | 1.4            | 693.1365             | 4   |

**Supplementary Table 23.** Assignment of fragment ions resulted from CID of parent ion  $m/z$  1043.74 ( $z = 6$ ) corresponding to composition dp31-5-Ser. CID mass spectra were acquired on the Bruker FT-ICR mass spectrometer.



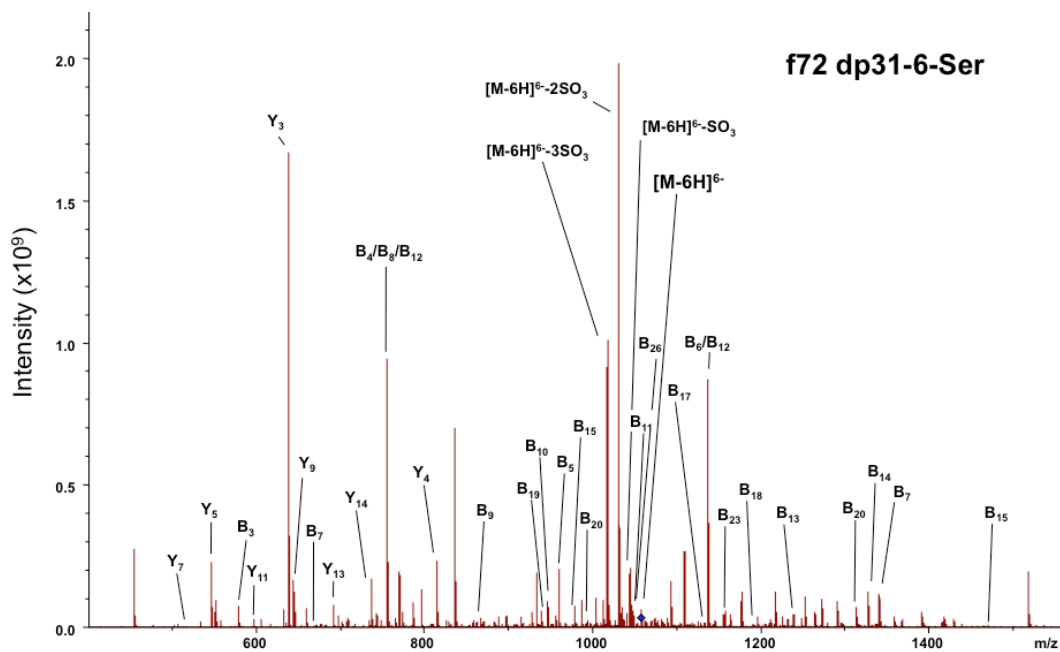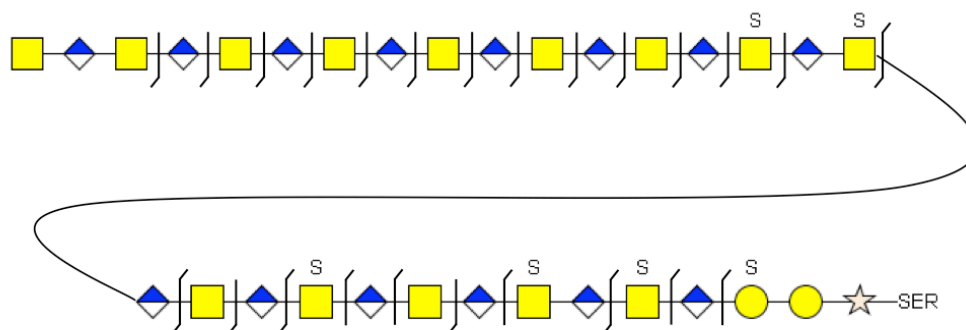

**Supplementary Figure 22.** Annotated spectra from CID-FT-ICR MS/MS in negative ion mode of UTI bikunin pG parent ion  $m/z$  1057.08 ( $z = 6$ ) and its fragmentation pattern providing sequence for composition dp31-6-Ser. Fragment ions assigned in Supplementary Table 24. All fragment ions were  $Y_n$  or  $B_n$  type.

| Cleavage | $m/z$     | Relative Intensity | Ion                          | Accuracy (ppm) | $m/z_{\text{theor}}$ | $z$ |
|----------|-----------|--------------------|------------------------------|----------------|----------------------|-----|
| B03      | 581.1833  | 3.80               | HexA1HexNAc2-B               | 0.4            | 581.1836             | 1   |
| B04      | 757.2146  | 46.51              | HexA2HexNAc2-B               | 1.4            | 757.2156             | 1   |
| B05      | 960.2941  | 9.87               | HexA2HexNAc3-B               | 1.0            | 960.2950             | 1   |
| B06      | 1136.3268 | 25.92              | HexA3HexNAc3-B               | 0.3            | 1136.3271            | 1   |
| B07      | 669.1994  | 0.21               | HexA3HexNAc4-B               | 0.3            | 669.1996             | 2   |
| B07      | 1339.4084 | 5.40               | HexA3HexNAc4-B               | -1.4           | 1339.4065            | 1   |
| B08      | 757.2146  | 46.51              | HexA4HexNAc4-B               | 1.4            | 757.2156             | 2   |
| B09      | 858.7549  | 1.10               | HexA4HexNAc5-B               | 0.5            | 858.7553             | 2   |
| B10      | 946.7707  | 4.04               | HexA5HexNAc5-B               | 0.7            | 946.7714             | 2   |
| B11      | 1048.3117 | 2.21               | HexA5HexNAc6-B               | -0.6           | 1048.3111            | 2   |
| B12      | 757.2146  | 46.51              | HexA6HexNAc6-B               | 1.4            | 757.2156             | 3   |
| B12      | 1136.3268 | 25.92              | HexA6HexNAc6-B               | 0.3            | 1136.3271            | 2   |
| B13      | 1237.8660 | 2.41               | HexA6HexNAc7-B               | 0.6            | 1237.8668            | 2   |
| B14      | 1325.8836 | 6.27               | HexA7HexNAc7-B               | -0.6           | 1325.8828            | 2   |
| B15      | 977.9321  | 0.35               | HexA7HexNAc8S1-B             | -0.6           | 977.9315             | 3   |
| B15      | 1467.4019 | 0.29               | HexA7HexNAc8S1-B             | -0.7           | 1467.4009            | 2   |
| B17      | 1130.9552 | 0.18               | HexA8HexNAc9S2-B             | -0.8           | 1130.9543            | 3   |
| B18      | 1189.6323 | 0.57               | HexA9HexNAc9S2-B             | -0.5           | 1189.6316            | 3   |
| B19      | 942.7412  | 0.22               | HexA9HexNAc10S2-B            | 0.6            | 942.7418             | 4   |
| B20      | 986.7495  | 0.97               | HexA10HexNAc10S2-B           | 0.3            | 986.7498             | 4   |
| B20      | 1316.0032 | 0.37               | HexA10HexNAc10S2-B           | -0.8           | 1316.0021            | 3   |
| B23      | 1152.2863 | 0.22               | HexA11HexNAc12S3-B           | 0.3            | 1152.2867            | 4   |
| B26      | 1048.6492 | 0.14               | HexA13HexNAc13S4-B           | -1.2           | 1048.6480            | 5   |
| Y03      | 640.1392  | 83.82              | Y-Hex2Pen1S1-Ser             | 1.3            | 640.1400             | 1   |
| Y04      | 816.1711  | 11.34              | Y-Hex2HexA1Pen1S1-Ser        | 1.2            | 816.1721             | 1   |
| Y05      | 549.1003  | 10.41              | Y-Hex2HexA1HexNAc1Pen1S2-Ser | 0.4            | 549.1005             | 2   |
| Y07      | 518.7540  | 0.20               | Y-Hex2HexA2HexNAc2Pen1S3-Ser | 0.0            | 518.7540             | 3   |
| Y09      | 645.1240  | 6.58               | Y-Hex2HexA3HexNAc3Pen1S3-Ser | 0.8            | 645.1245             | 3   |
| Y10      | 703.8016  | 0.78               | Y-Hex2HexA4HexNAc3Pen1S3-Ser | 0.4            | 703.8019             | 3   |
| Y11      | 598.3580  | 0.27               | Y-Hex2HexA4HexNAc4Pen1S4-Ser | 1.0            | 598.3586             | 4   |
| Y13      | 693.1362  | 4.05               | Y-Hex2HexA5HexNAc5Pen1S4-Ser | 0.4            | 693.1365             | 4   |
| Y14      | 737.1436  | 0.41               | Y-Hex2HexA6HexNAc5Pen1S4-Ser | 1.2            | 737.1445             | 4   |

**Supplementary Table 24.** Assignment of fragment ions resulted from CID of parent ion  $m/z$  1057.08 ( $z = 6$ ) corresponding to composition dp31-6-Ser. CID mass spectra were acquired on the Bruker FT-ICR mass spectrometer.

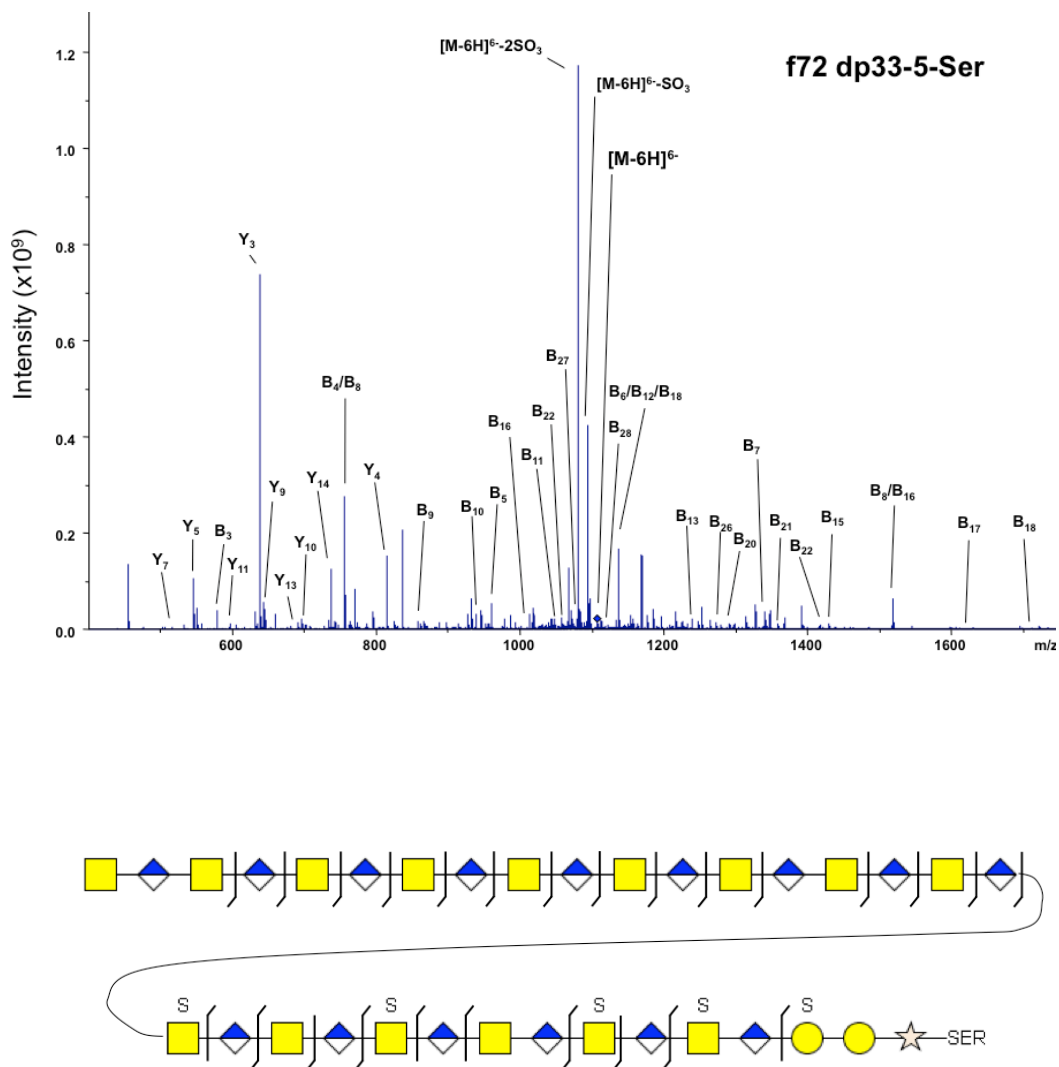

**Supplementary Figure 23.** Annotated spectra from CID-FT-ICR MS/MS in negative ion mode of UTI bikunin pG parent ion  $m/z$  1106.93 ( $z = 6$ ) and its fragmentation pattern providing sequence for composition dp33-5-Ser. Fragment ions assigned in Supplementary Table 25. All fragment ions were  $Y_n$  or  $B_n$  type.

| Cleavage | $m/z$     | Relative Intensity | Ion                          | Accuracy (ppm) | $m/z_{\text{theor}}$ | $z$ |
|----------|-----------|--------------------|------------------------------|----------------|----------------------|-----|
| B03      | 581.1832  | 3.43               | HexA1HexNAc2-B               | 0.6            | 581.1836             | 1   |
| B04      | 757.2146  | 23.50              | HexA2HexNAc2-B               | 1.4            | 757.2156             | 1   |
| B05      | 960.2943  | 4.69               | HexA2HexNAc3-B               | 0.7            | 960.2950             | 1   |
| B06      | 1136.3261 | 9.49               | HexA3HexNAc3-B               | 0.9            | 1136.3271            | 1   |
| B07      | 1339.4069 | 3.00               | HexA3HexNAc4-B               | -0.3           | 1339.4065            | 1   |
| B08      | 757.2146  | 23.50              | HexA4HexNAc4-B               | 1.4            | 757.2156             | 2   |
| B08      | 1515.4389 | 1.73               | HexA4HexNAc4-B               | -0.2           | 1515.4386            | 1   |
| B09      | 858.7549  | 1.21               | HexA4HexNAc5-B               | 0.5            | 858.7553             | 2   |
| B10      | 946.7713  | 2.93               | HexA5HexNAc5-B               | 0.1            | 946.7714             | 2   |
| B11      | 1048.3104 | 1.77               | HexA5HexNAc6-B               | 0.6            | 1048.3111            | 2   |
| B12      | 1136.3261 | 9.49               | HexA6HexNAc6-B               | 0.9            | 1136.3271            | 2   |
| B13      | 1237.8660 | 2.03               | HexA6HexNAc7-B               | 0.6            | 1237.8668            | 2   |
| B15      | 1427.4240 | 1.01               | HexA7HexNAc8-B               | -1.0           | 1427.4225            | 2   |
| B16      | 1009.9564 | 0.38               | HexA8HexNAc8-B               | 0.2            | 1009.9566            | 3   |
| B16      | 1515.4389 | 1.73               | HexA8HexNAc8-B               | -0.2           | 1515.4386            | 2   |
| B17      | 1616.9780 | 0.21               | HexA8HexNAc9-B               | 0.2            | 1616.9783            | 2   |
| B18      | 1136.3261 | 9.49               | HexA9HexNAc9-B               | 0.9            | 1136.3271            | 3   |
| B18      | 1704.9902 | 0.24               | HexA9HexNAc9-B               | 2.4            | 1704.9943            | 2   |
| B20      | 1289.3495 | 1.22               | HexA10HexNAc10S1-B           | 0.3            | 1289.3499            | 3   |
| B21      | 1357.0428 | 0.40               | HexA10HexNAc11S1-B           | 0.1            | 1357.0430            | 3   |
| B22      | 1061.5379 | 0.50               | HexA11HexNAc11S1-B           | 0.5            | 1061.5384            | 4   |
| B22      | 1415.7202 | 0.90               | HexA11HexNAc11S1-B           | 0.1            | 1415.7204            | 3   |
| B26      | 1271.0833 | 1.29               | HexA13HexNAc13S2-B           | 0.1            | 1271.0834            | 4   |
| B27      | 1073.2718 | 0.57               | HexA13HexNAc14S3-B           | 0.6            | 1073.2725            | 5   |
| B28      | 1108.4781 | 0.93               | HexA14HexNAc14S3-B           | 0.7            | 1108.4789            | 5   |
| Y03      | 640.1393  | 63.05              | Y-Hex2Pen1S1-Ser             | 1.1            | 640.1400             | 1   |
| Y04      | 816.1712  | 12.93              | Y-Hex2HexA1Pen1S1-Ser        | 1.1            | 816.1721             | 1   |
| Y05      | 549.1000  | 8.20               | Y-Hex2HexA1HexNAc1Pen1S2-Ser | 0.9            | 549.1005             | 2   |
| Y07      | 518.7537  | 0.30               | Y-Hex2HexA2HexNAc2Pen1S3-Ser | 0.6            | 518.7540             | 3   |
| Y09      | 645.1241  | 4.15               | Y-Hex2HexA3HexNAc3Pen1S3-Ser | 0.6            | 645.1245             | 3   |
| Y10      | 703.8014  | 0.78               | Y-Hex2HexA4HexNAc3Pen1S3-Ser | 0.6            | 703.8019             | 3   |
| Y11      | 598.3580  | 0.31               | Y-Hex2HexA4HexNAc4Pen1S4-Ser | 1.0            | 598.3586             | 4   |
| Y13      | 693.1360  | 1.20               | Y-Hex2HexA5HexNAc5Pen1S4-Ser | 0.7            | 693.1365             | 4   |
| Y14      | 737.1436  | 0.25               | Y-Hex2HexA6HexNAc5Pen1S4-Ser | 1.2            | 737.1445             | 4   |

**Supplementary Table 25.** Assignment of fragment ions resulted from CID of parent ion  $m/z$  1106.93 ( $z = 6$ ) corresponding to composition dp33-5-Ser. CID mass spectra were acquired on the Bruker FT-ICR mass spectrometer.

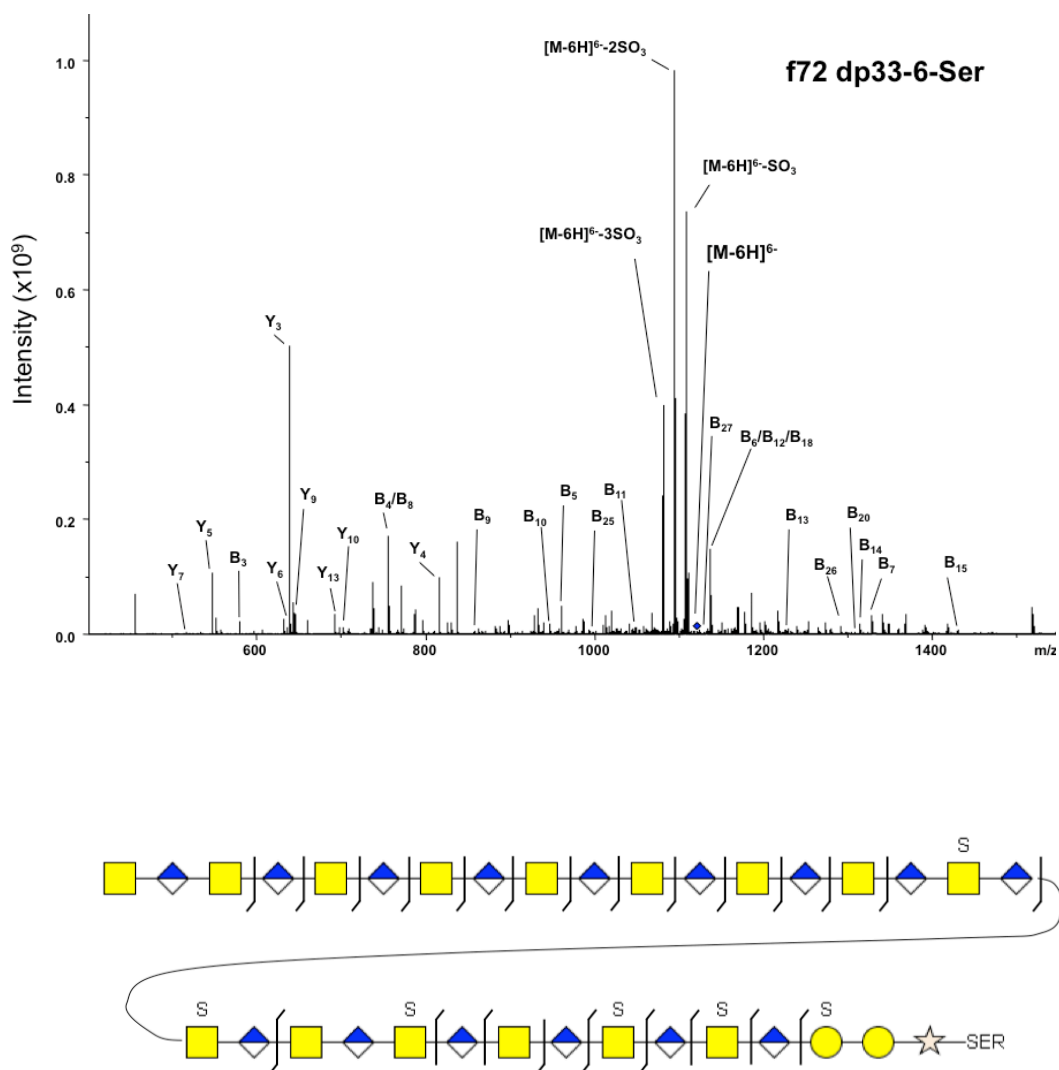

**Supplementary Figure 24.** Annotated spectra from CID-FT-ICR MS/MS in negative ion mode of UTI bikunin pG parent ion  $m/z$  1120.25 ( $z = 6$ ) and its fragmentation pattern providing sequence for composition dp33-6-Ser. Fragment ions assigned in Supplementary Table 26. All fragment ions were  $Y_n$  or  $B_n$  type.

| Cleavage | $m/z$     | Relative Intensity | Ion                          | Accuracy (ppm) | $m/z_{\text{theor}}$ | $z$ |
|----------|-----------|--------------------|------------------------------|----------------|----------------------|-----|
| B03      | 581.1832  | 2.29               | HexA1HexNAc2-B               | 0.6            | 581.1836             | 1   |
| B04      | 757.2151  | 17.42              | HexA2HexNAc2-B               | 0.7            | 757.2156             | 1   |
| B05      | 960.2944  | 4.88               | HexA2HexNAc3-B               | 0.6            | 960.2950             | 1   |
| B06      | 1136.3272 | 9.22               | HexA3HexNAc3-B               | -0.1           | 1136.3271            | 1   |
| B07      | 1339.4077 | 3.44               | HexA3HexNAc4-B               | -0.9           | 1339.4065            | 1   |
| B08      | 757.2151  | 17.42              | HexA4HexNAc4-B               | 0.7            | 757.2156             | 2   |
| B09      | 858.7547  | 0.52               | HexA4HexNAc5-B               | 0.7            | 858.7553             | 2   |
| B10      | 946.7709  | 1.66               | HexA5HexNAc5-B               | 0.5            | 946.7714             | 2   |
| B11      | 1048.3114 | 1.29               | HexA5HexNAc6-B               | -0.3           | 1048.3111            | 2   |
| B12      | 1136.3272 | 9.22               | HexA6HexNAc6-B               | -0.1           | 1136.3271            | 2   |
| B12      | 1136.3272 | 9.22               | HexA9HexNAc9-B               | -0.1           | 1136.3271            | 3   |
| B13      | 1237.8669 | 1.41               | HexA6HexNAc7-B               | -0.1           | 1237.8668            | 2   |
| B14      | 1325.8836 | 3.33               | HexA7HexNAc7-B               | -0.6           | 1325.8828            | 2   |
| B15      | 1427.4239 | 0.78               | HexA7HexNAc8-B               | -1.0           | 1427.4225            | 2   |
| B18      | 1162.9790 | 0.94               | HexA9HexNAc9S1-B             | 0.3            | 1162.9794            | 3   |
| B20      | 1316.0028 | 0.40               | HexA10HexNAc10S2-B           | -0.5           | 1316.0021            | 3   |
| B25      | 997.4492  | 0.31               | HexA12HexNAc13S3-B           | 1.0            | 997.4502             | 5   |
| B26      | 1291.0732 | 0.39               | HexA13HexNAc13S3-B           | -0.5           | 1291.0726            | 4   |
| B27      | 1124.4699 | 0.32               | HexA14HexNAc14S4-B           | 0.3            | 1124.4703            | 5   |
| Y03      | 640.1393  | 50.93              | Y-Hex2Pen1S1-Ser             | 1.1            | 640.1400             | 1   |
| Y04      | 816.1713  | 9.74               | Y-Hex2HexA1Pen1S1-Ser        | 1.0            | 816.1721             | 1   |
| Y05      | 549.1000  | 10.23              | Y-Hex2HexA1HexNAc1Pen1S2-Ser | 0.9            | 549.1005             | 2   |
| Y06      | 637.1160  | 1.14               | Y-Hex2HexA2HexNAc1Pen1S2-Ser | 0.9            | 637.1165             | 2   |
| Y07      | 518.7535  | 0.31               | Y-Hex2HexA2HexNAc2Pen1S3-Ser | 1.0            | 518.7540             | 3   |
| Y09      | 645.1239  | 4.57               | Y-Hex2HexA3HexNAc3Pen1S3-Ser | 0.9            | 645.1245             | 3   |
| Y10      | 703.8013  | 1.07               | Y-Hex2HexA4HexNAc3Pen1S3-Ser | 0.8            | 703.8019             | 3   |
| Y13      | 693.1361  | 3.49               | Y-Hex2HexA5HexNAc5Pen1S4-Ser | 0.6            | 693.1365             | 4   |

**Supplementary Table 26.** Assignment of fragment ions resulted from CID of parent ion  $m/z$  1120.25 ( $z = 6$ ) corresponding to composition dp33-6-Ser. CID mass spectra were acquired on the Bruker FT-ICR mass spectrometer.

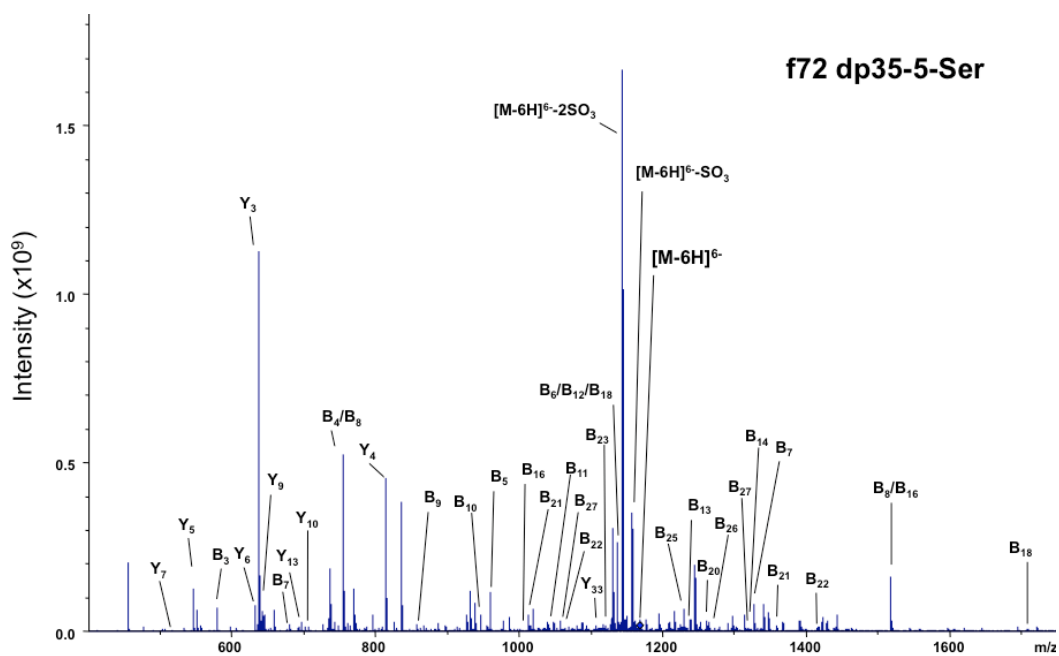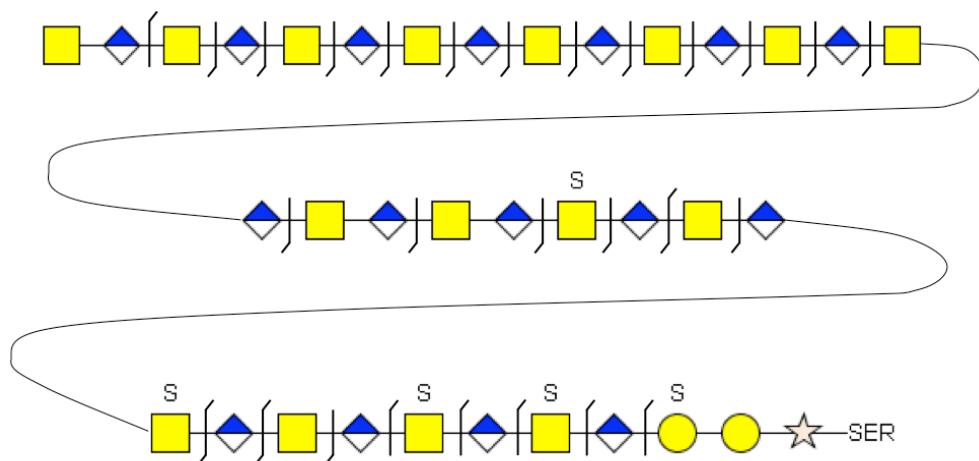

**Supplementary Figure 25.** Annotated spectra from CID-FT-ICR MS/MS in negative ion mode of UTI bikunin pG parent ion  $m/z$  1170.12 ( $z = 6$ ) and its fragmentation pattern providing sequence for composition dp35-5-Ser. Fragment ions assigned in Supplementary Table 27. All fragment ions were  $Y_n$  or  $B_n$  type.

| Cleavage | $m/z$     | Relative Intensity | Ion                            | Accuracy (ppm) | $m/z_{\text{theor}}$ | $z$ |
|----------|-----------|--------------------|--------------------------------|----------------|----------------------|-----|
| B03      | 581.1832  | 4.36               | HexA1HexNAc2-B                 | 0.6            | 581.1836             | 1   |
| B04      | 757.2145  | 32.10              | HexA2HexNAc2-B                 | 1.5            | 757.2156             | 1   |
| B05      | 960.2944  | 7.11               | HexA2HexNAc3-B                 | 0.6            | 960.2950             | 1   |
| B06      | 1136.3258 | 10.11              | HexA3HexNAc3-B                 | 1.1            | 1136.3271            | 1   |
| B07      | 669.1993  | 0.16               | HexA3HexNAc4-B                 | 0.4            | 669.1996             | 2   |
| B07      | 1339.4072 | 4.62               | HexA3HexNAc4-B                 | -0.5           | 1339.4065            | 1   |
| B08      | 757.2145  | 32.10              | HexA4HexNAc4-B                 | 1.5            | 757.2156             | 2   |
| B08      | 1515.4399 | 2.80               | HexA4HexNAc4-B                 | -0.9           | 1515.4386            | 1   |
| B09      | 858.7546  | 0.63               | HexA4HexNAc5-B                 | 0.9            | 858.7553             | 2   |
| B10      | 946.7716  | 2.59               | HexA5HexNAc5-B                 | -0.2           | 946.7714             | 2   |
| B11      | 1048.3106 | 1.66               | HexA5HexNAc6-B                 | 0.4            | 1048.3111            | 2   |
| B12      | 1136.3258 | 10.11              | HexA6HexNAc6-B                 | 1.1            | 1136.3271            | 2   |
| B13      | 1237.8665 | 2.35               | HexA6HexNAc7-B                 | 0.2            | 1237.8668            | 2   |
| B14      | 1325.8821 | 1.16               | HexA7HexNAc7-B                 | 0.6            | 1325.8828            | 2   |
| B16      | 1009.9570 | 0.22               | HexA8HexNAc8-B                 | -0.4           | 1009.9566            | 3   |
| B16      | 1515.4399 | 2.80               | HexA8HexNAc8-B                 | -0.9           | 1515.4386            | 2   |
| B18      | 1136.3258 | 10.11              | HexA9HexNAc9-B                 | 1.1            | 1136.3271            | 3   |
| B18      | 1704.9968 | 0.42               | HexA9HexNAc9-B                 | -1.5           | 1704.9943            | 2   |
| B20      | 1262.6986 | 1.65               | HexA10HexNAc10-B               | -0.8           | 1262.6976            | 3   |
| B21      | 1017.5302 | 0.44               | HexA10HexNAc11S1-B             | 0.2            | 1017.5304            | 4   |
| B21      | 1357.0444 | 0.87               | HexA10HexNAc11S1-B             | -1.0           | 1357.0430            | 3   |
| B22      | 1061.5384 | 0.45               | HexA11HexNAc11S1-B             | 0.0            | 1061.5384            | 4   |
| B22      | 1415.7211 | 0.78               | HexA11HexNAc11S1-B             | -0.5           | 1415.7204            | 3   |
| B23      | 1112.3080 | 0.73               | HexA11HexNAc12S1-B             | 0.3            | 1112.3083            | 4   |
| B25      | 1227.0772 | 0.40               | HexA12HexNAc13S2-B             | -1.5           | 1227.0754            | 4   |
| B26      | 1271.0837 | 0.62               | HexA13HexNAc13S2-B             | -0.3           | 1271.0834            | 4   |
| B27      | 1057.2818 | 0.40               | HexA13HexNAc14S2-B             | -0.6           | 1057.2811            | 5   |
| B27      | 1321.8537 | 0.36               | HexA13HexNAc14S2-B             | -0.4           | 1321.8532            | 4   |
| Y03      | 640.1393  | 69.46              | Y-Hex2Pen1S1-Ser               | 1.1            | 640.1400             | 1   |
| Y04      | 816.1712  | 27.15              | Y-Hex2HexA1Pen1S1-Ser          | 1.1            | 816.1721             | 1   |
| Y05      | 549.1001  | 7.21               | Y-Hex2HexA1HexNAc1Pen1S2-Ser   | 0.7            | 549.1005             | 2   |
| Y06      | 637.1163  | 1.17               | Y-Hex2HexA2HexNAc1Pen1S2-Ser   | 0.4            | 637.1165             | 2   |
| Y07      | 518.7535  | 0.17               | Y-Hex2HexA2HexNAc2Pen1S3-Ser   | 1.0            | 518.7540             | 3   |
| Y09      | 645.1243  | 3.19               | Y-Hex2HexA3HexNAc3Pen1S3-Ser   | 0.3            | 645.1245             | 3   |
| Y10      | 703.8018  | 0.77               | Y-Hex2HexA4HexNAc3Pen1S3-Ser   | 0.1            | 703.8019             | 3   |
| Y13      | 693.1359  | 0.54               | Y-Hex2HexA5HexNAc5Pen1S4-Ser   | 0.8            | 693.1365             | 4   |
| Y33      | 1106.9333 | 0.64               | Y-Hex2HexA15HexNAc15Pen1S5-Ser | 0.5            | 1106.9338            | 6   |

**Supplementary Table 27.** Assignment of fragment ions resulted from CID of parent ion  $m/z$  1170.12 ( $z = 6$ ) corresponding to composition dp35-5-Ser. CID mass spectra were acquired on the Bruker FT-ICR mass spectrometer.



f73 dp35-5-Ser

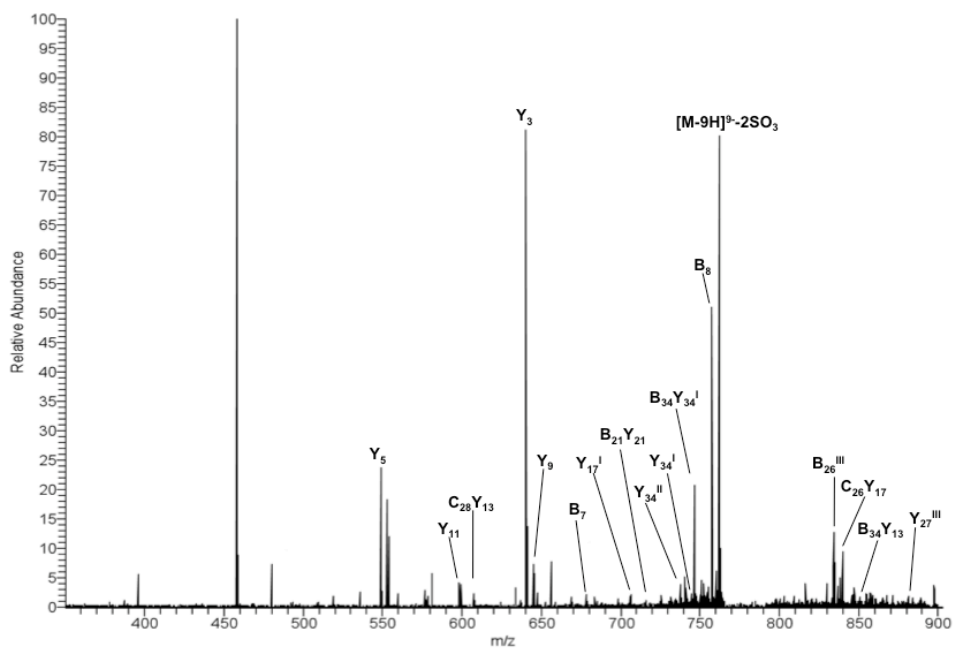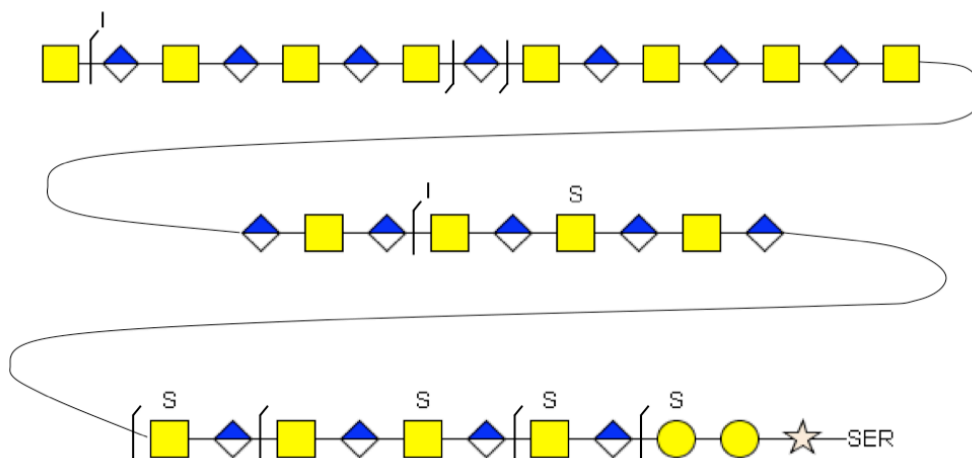

**Supplementary Figure 26.** Annotated spectra from CID-FTMS/MS in negative ion mode of UTI bikunin pG parent ion  $m/z$  779.74 ( $z = 9$ ) and its fragmentation pattern providing sequence for composition dp35-5-Ser. Fragment ions assigned in Supplementary Table 28. Observed fragment ions include  $C_n$ ,  $Z_n$ ,  $Y_n$  or  $B_n$  type.

| Cleavage            | <i>m/z</i> | Relative Intensity | Ion                            | Accuracy (ppm) | <i>M</i> <sub>exp</sub> | <i>M</i> <sub>theor</sub> |
|---------------------|------------|--------------------|--------------------------------|----------------|-------------------------|---------------------------|
| CY                  | 458.0610   | 100                | HexA1HexNAc1S1-C               | 1.2            | 459.0688                | 459.0683                  |
| C28Y13              | 607.6384   | 2.3                | HexA3HexNAc3S1                 | 1.0            | 1217.2925               | 1217.2912                 |
| B21Y21              | 718.1791   | 0.78               | HexA3HexNAc5S1                 | -5.1           | 1438.3739               | 1438.3811                 |
| C26Y17              | 837.1722   | 3.61               | HexA4HexNAc4S2                 | 0.3            | 1676.3601               | 1676.3595                 |
| B34Y13              | 851.4906   | 1.06               | Hex2HexA5HexNAc5S4             | -2.2           | 2557.4953               | 2557.5008                 |
| B34Y34 <sup>I</sup> | 746.5166   | 17.13              | Hex2HexA16HexNAc15S4           | -1.0           | 6727.7198               | 6727.7268                 |
| B7                  | 678.2046   | 2.15               | HexA3HexNAc4-B                 | 0.0            | 1358.4249               | 1358.4249                 |
| B8                  | 757.2155   | 52.89              | HexA4HexNAc4-B                 | 0.5            | 1516.4467               | 1516.4458                 |
| B26 <sup>III</sup>  | 833.7269   | 2.09               | HexA13HexNAc13S1-C             | 0.5            | 5008.4084               | 5008.4058                 |
| Y3                  | 640.1400   | 83.12              | Y-Hex2Pen1S1-Ser               | 0.8            | 641.1478                | 641.1473                  |
| Y5                  | 549.1005   | 24.47              | Y-Hex2HexA1HexNAc1Pen1S2-Ser   | 0.0            | 1100.2167               | 1100.2167                 |
| Y9                  | 645.1241   | 7.43               | Y-Hex2HexA3HexNAc3Pen1S3-Ser   | 0.2            | 1938.3958               | 1938.3953                 |
| Y11 <sup>I</sup>    | 578.3692   | 1.54               | Y-Hex2HexA4HexNAc4Pen1S3-Ser   | 0.6            | 2317.5081               | 2317.5068                 |
| Y11                 | 598.3583   | 4.34               | Y-Hex2HexA4HexNAc4Pen1S4-Ser   | 0.4            | 2397.4645               | 2397.4636                 |
| Y17 <sup>I</sup>    | 705.9550   | 1.01               | Y-Hex2HexA7HexNAc7Pen1S4-Ser   | 4.6            | 3534.8141               | 3534.7980                 |
| Y27 <sup>III</sup>  | 881.0646   | 0.68               | Y-Hex2HexA12HexNAc12Pen1S2-Ser | -2.2           | 5292.4346               | 5292.4460                 |
| Y34 <sup>II</sup>   | 737.4091   | 1.38               | Y-Hex2HexA16HexNAc15Pen1S3-Ser | -0.3           | 6645.7523               | 6645.7543                 |
| Y34 <sup>I</sup>    | 746.2939   | 1.54               | Y-Hex2HexA16HexNAc15Pen1S4-Ser | 0.6            | 6725.7155               | 6725.7112                 |
| Y35 <sup>II</sup>   | 761.9752   | 17.55              | Y-Hex2HexA16HexNAc16Pen1S3-Ser | -1.4           | 6866.8472               | 6866.8570                 |

**Supplementary Table 28.** Assignment of fragment ions resulted from CID of parent ion *m/z* 779.74 (*z* = 9) corresponding to composition dp35-5-Ser. CID mass spectra were acquired on the orbitrap FT mass spectrometer.

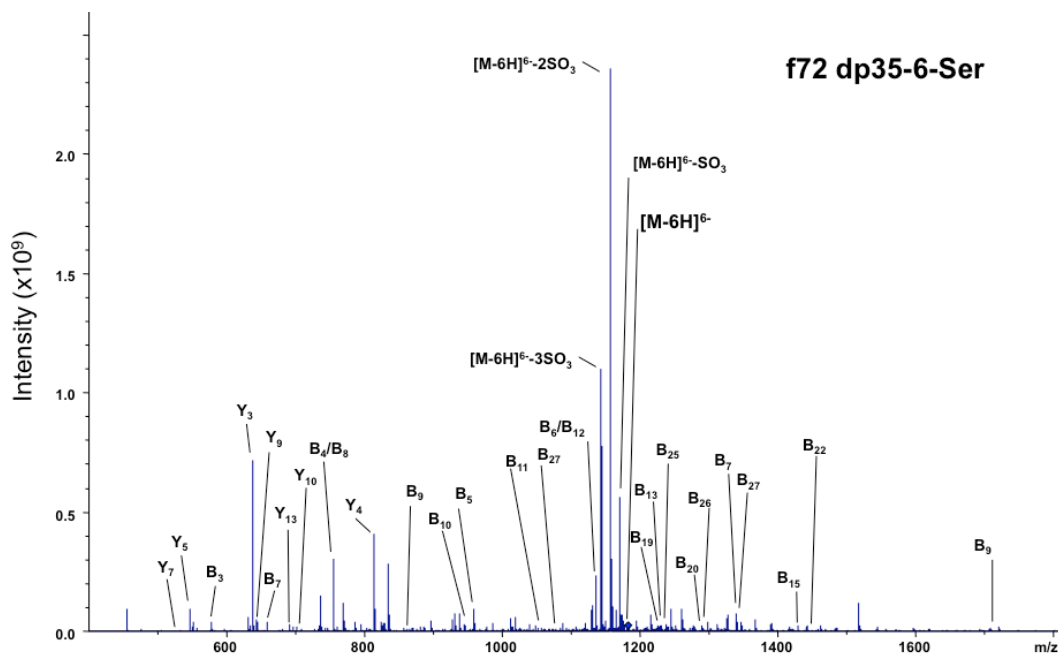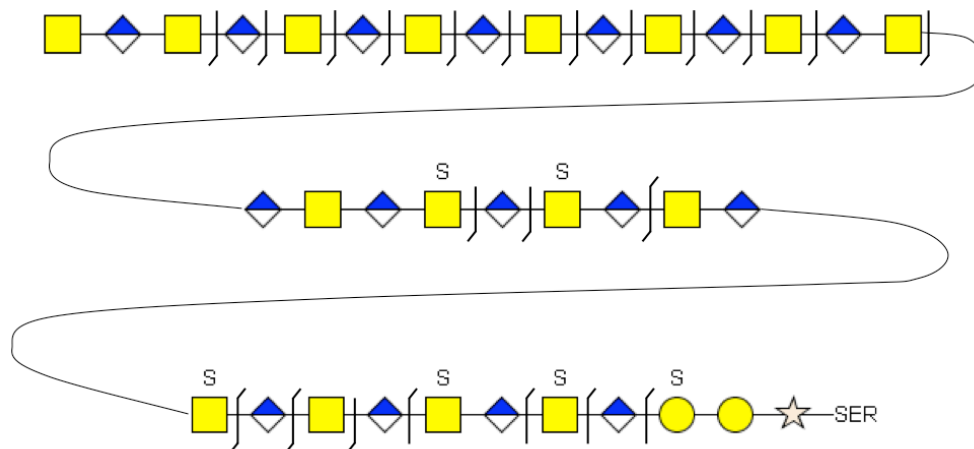

**Supplementary Figure 27.** Annotated spectra from CID-FT-ICR MS/MS in negative ion mode of UTI bikunin pG parent ion  $m/z$  1183.45 ( $z = 6$ ) and its fragmentation pattern providing sequence for dp35-6-Ser. Fragment ions assigned in Supplementary Table 29. All fragment ions were  $Y_n$  or  $B_n$  type.

| Cleavage | $m/z$     | Relative Intensity | Ion                          | Accuracy (ppm) | $m/z_{\text{theor}}$ | $z$ |
|----------|-----------|--------------------|------------------------------|----------------|----------------------|-----|
| B03      | 581.1833  | 1.59               | HexA1HexNAc2-B               | 0.4            | 581.1836             | 1   |
| B04      | 757.2149  | 12.43              | HexA2HexNAc2-B               | 1.0            | 757.2156             | 1   |
| B05      | 960.2943  | 3.92               | HexA2HexNAc3-B               | 0.7            | 960.2950             | 1   |
| B06      | 1136.3272 | 5.81               | HexA3HexNAc3-B               | -0.1           | 1136.3271            | 1   |
| B07      | 669.1991  | 0.09               | HexA3HexNAc4-B               | 0.7            | 669.1996             | 2   |
| B07      | 1339.4077 | 2.86               | HexA3HexNAc4-B               | -0.9           | 1339.4065            | 1   |
| B08      | 757.2149  | 12.43              | HexA4HexNAc4-B               | 1.0            | 757.2156             | 2   |
| B09      | 858.7551  | 0.42               | HexA4HexNAc5-B               | 0.3            | 858.7553             | 2   |
| B09      | 1718.5196 | 0.64               | HexA4HexNAc5-B               | -1.0           | 1718.5179            | 1   |
| B10      | 946.7709  | 1.08               | HexA5HexNAc5-B               | 0.5            | 946.7714             | 2   |
| B11      | 1048.3118 | 1.07               | HexA5HexNAc6-B               | -0.7           | 1048.3111            | 2   |
| B12      | 1136.3272 | 5.81               | HexA6HexNAc6-B               | -0.1           | 1136.3271            | 2   |
| B13      | 1237.8658 | 1.35               | HexA6HexNAc7-B               | 0.8            | 1237.8668            | 2   |
| B15      | 1427.4243 | 0.96               | HexA7HexNAc8-B               | -1.2           | 1427.4225            | 2   |
| B19      | 1230.6742 | 1.03               | HexA9HexNAc10S1-B            | -1.4           | 1230.6725            | 3   |
| B20      | 1289.3494 | 0.91               | HexA10HexNAc10S1-B           | 0.4            | 1289.3499            | 3   |
| B22      | 1442.3734 | 0.18               | HexA11HexNAc11S2-B           | -0.5           | 1442.3726            | 3   |
| B25      | 1247.0653 | 0.14               | HexA12HexNAc13S3-B           | -0.6           | 1247.0646            | 4   |
| B26      | 1291.0730 | 0.14               | HexA13HexNAc13S3-B           | -0.3           | 1291.0726            | 4   |
| B27      | 1073.2719 | 0.19               | HexA13HexNAc14S3-B           | 0.5            | 1073.2725            | 5   |
| B27      | 1341.8430 | 0.20               | HexA13HexNAc14S3-B           | -0.4           | 1341.8424            | 4   |
| Y03      | 640.1394  | 29.90              | Y-Hex2Pen1S1-Ser             | 1.0            | 640.1400             | 1   |
| Y04      | 816.1710  | 16.30              | Y-Hex2HexA1Pen1S1-Ser        | 1.3            | 816.1721             | 1   |
| Y05      | 549.1003  | 3.63               | Y-Hex2HexA1HexNAc1Pen1S2-Ser | 0.4            | 549.1005             | 2   |
| Y07      | 518.7538  | 0.08               | Y-Hex2HexA2HexNAc2Pen1S3-Ser | 0.4            | 518.7540             | 3   |
| Y09      | 645.1241  | 1.68               | Y-Hex2HexA3HexNAc3Pen1S3-Ser | 0.6            | 645.1245             | 3   |
| Y10      | 703.8015  | 0.70               | Y-Hex2HexA4HexNAc3Pen1S3-Ser | 0.5            | 703.8019             | 3   |
| Y13      | 693.1363  | 1.24               | Y-Hex2HexA5HexNAc5Pen1S4-Ser | 0.3            | 693.1365             | 4   |

**Supplementary Table 29.** Assignment of fragment ions resulted from CID of parent ion  $m/z$  1183.45 ( $z = 6$ ) corresponding to composition dp35-6-Ser. CID mass spectra were acquired on the Bruker FT-ICR mass spectrometer.

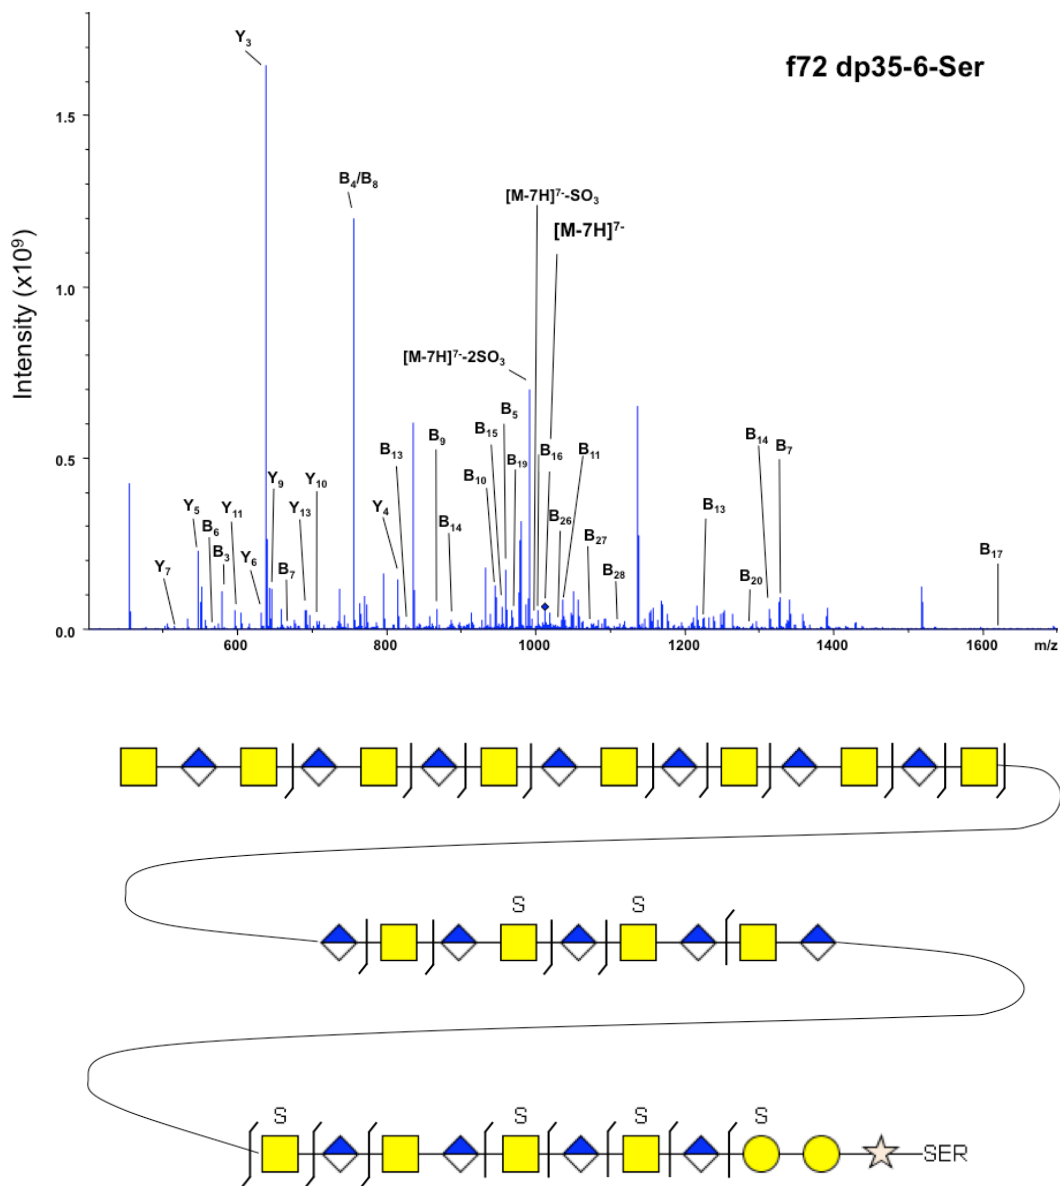

**Supplementary Figure 28.** Annotated spectra from CID-FT-ICR MS/MS in negative ion mode of UTI bikunin pG parent ion  $m/z$  1014.23 ( $z = 7$ ) and its fragmentation pattern providing sequence for composition dp35-6-Ser. Fragment ions assigned in Supplementary Table 30. All fragment ions were  $Y_n$  or  $B_n$  type.

| Cleavage | $m/z$     | Relative Intensity | Ion                          | Accuracy (ppm) | $m/z_{\text{theor}}$ | $z$ |
|----------|-----------|--------------------|------------------------------|----------------|----------------------|-----|
| B03      | 581.1831  | 6.94               | HexA1HexNAc2-B               | 0.8            | 581.1836             | 1   |
| B05      | 960.2945  | 10.13              | HexA2HexNAc3-B               | 0.5            | 960.2950             | 1   |
| B06      | 567.6595  | 0.16               | HexA3HexNAc3-B               | 0.7            | 567.6599             | 2   |
| B07      | 669.1990  | 0.57               | HexA3HexNAc4-B               | 0.9            | 669.1996             | 2   |
| B07      | 1339.4074 | 5.02               | HexA3HexNAc4-B               | -0.7           | 1339.4065            | 1   |
| B09      | 858.7544  | 2.00               | HexA4HexNAc5-B               | 1.1            | 858.7553             | 2   |
| B10      | 946.7714  | 6.72               | HexA5HexNAc5-B               | 0.0            | 946.7714             | 2   |
| B11      | 1048.3103 | 2.75               | HexA5HexNAc6-B               | 0.7            | 1048.3111            | 2   |
| B13      | 824.9081  | 0.19               | HexA6HexNAc7-B               | 0.8            | 824.9088             | 3   |
| B13      | 1237.8664 | 2.47               | HexA6HexNAc7-B               | 0.3            | 1237.8668            | 2   |
| B14      | 883.5861  | 0.38               | HexA7HexNAc7-B               | 0.0            | 883.5861             | 3   |
| B14      | 1325.8819 | 1.59               | HexA7HexNAc7-B               | 0.7            | 1325.8828            | 2   |
| B15      | 951.2794  | 0.38               | HexA7HexNAc8-B               | -0.2           | 951.2793             | 3   |
| B16      | 1009.9565 | 1.24               | HexA8HexNAc8-B               | 0.1            | 1009.9566            | 3   |
| B17      | 1616.9791 | 0.22               | HexA8HexNAc9-B               | -0.5           | 1616.9783            | 2   |
| B19      | 966.7605  | 0.31               | HexA10HexNAc10S1-B           | 0.1            | 966.7606             | 4   |
| B20      | 1289.3506 | 1.09               | HexA10HexNAc10S1-B           | -0.6           | 1289.3499            | 3   |
| B26      | 1032.6561 | 0.39               | HexA13HexNAc13S3-B           | 0.5            | 1032.6566            | 5   |
| B27      | 1073.2737 | 0.22               | HexA13HexNAc14S3-B           | -1.1           | 1073.2725            | 5   |
| B28      | 1108.4785 | 0.44               | HexA14HexNAc14S3-B           | 0.4            | 1108.4789            | 5   |
| Y03      | 640.1392  | 100.00             | Y-Hex2Pen1S1-Ser             | 1.3            | 640.1400             | 1   |
| Y04      | 816.1714  | 8.73               | Y-Hex2HexA1Pen1S1-Ser        | 0.9            | 816.1721             | 1   |
| Y05      | 549.1000  | 12.91              | Y-Hex2HexA1HexNAc1Pen1S2-Ser | 0.9            | 549.1005             | 2   |
| Y06      | 637.1163  | 0.54               | Y-Hex2HexA2HexNAc1Pen1S2-Ser | 0.4            | 637.1165             | 2   |
| Y07      | 518.7534  | 0.44               | Y-Hex2HexA2HexNAc2Pen1S3-Ser | 1.2            | 518.7540             | 3   |
| Y09      | 645.1243  | 5.98               | Y-Hex2HexA3HexNAc3Pen1S3-Ser | 0.3            | 645.1245             | 3   |
| Y10      | 703.8016  | 0.63               | Y-Hex2HexA4HexNAc3Pen1S3-Ser | 0.4            | 703.8019             | 3   |
| Y11      | 598.3581  | 0.59               | Y-Hex2HexA4HexNAc4Pen1S4-Ser | 0.9            | 598.3586             | 4   |
| Y13      | 693.1361  | 3.34               | Y-Hex2HexA5HexNAc5Pen1S4-Ser | 0.6            | 693.1365             | 4   |

**Supplementary Table 30.** Assignment of fragment ions resulted from CID of parent ion  $m/z$  1014.23 ( $z = 7$ ) corresponding to composition dp35-6-Ser. CID mass spectra were acquired on the Bruker FT-ICR mass spectrometer.

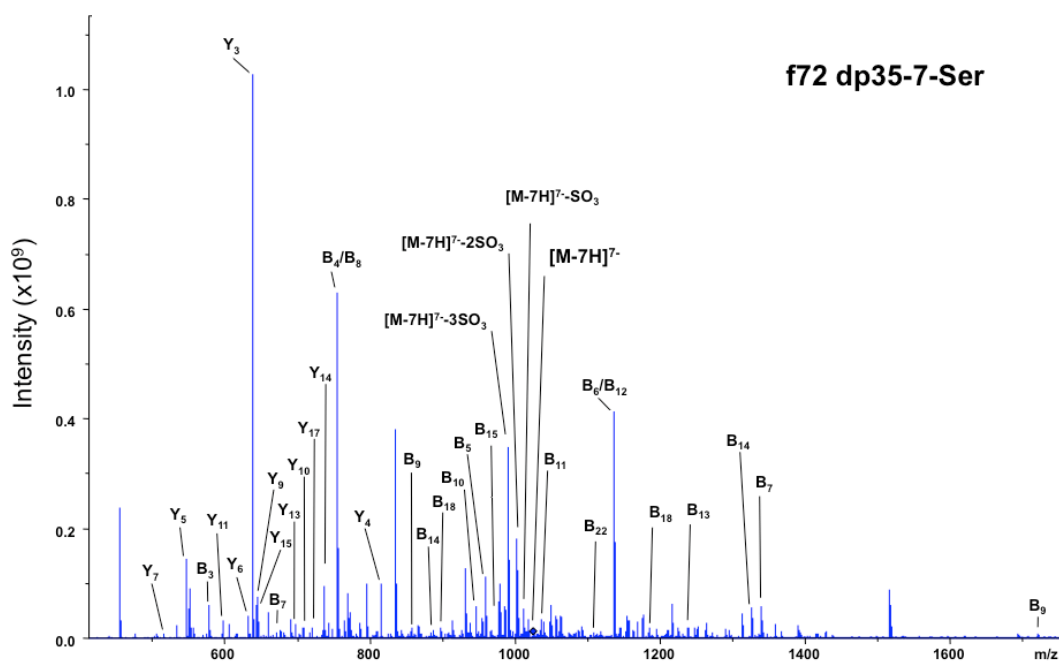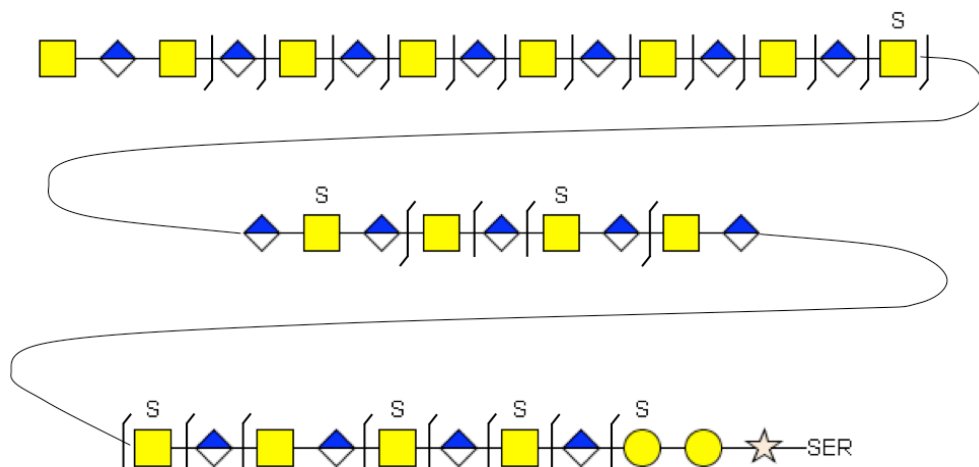

**Supplementary Figure 29.** Annotated spectra from CID-FT-ICR MS/MS in negative ion mode of UTI bikunin pG parent ion  $m/z$  1025.66 ( $z = 7$ ) and its fragmentation pattern providing sequence for composition dp35-7-Ser. Fragment ions assigned in Supplementary Table 31. All fragment ions were  $Y_n$  or  $B_n$  type.

| Cleavage | $m/z$     | Relative Intensity | Ion                          | Accuracy (ppm) | $m/z_{\text{theor}}$ | $z$ |
|----------|-----------|--------------------|------------------------------|----------------|----------------------|-----|
| B03      | 581.1831  | 5.95               | HexA1HexNAc2-B               | 0.79           | 581.1836             | 1   |
| B04      | 757.2148  | 60.75              | HexA2HexNAc2-B               | 1.12           | 757.2156             | 1   |
| B05      | 960.2941  | 10.75              | HexA2HexNAc3-B               | 0.96           | 960.2950             | 1   |
| B06      | 1136.3266 | 23.98              | HexA3HexNAc3-B               | 0.44           | 1136.3271            | 1   |
| B07      | 669.1990  | 0.50               | HexA3HexNAc4-B               | 0.90           | 669.1996             | 2   |
| B07      | 1339.4066 | 5.36               | HexA3HexNAc4-B               | -0.09          | 1339.4065            | 1   |
| B08      | 757.2148  | 60.75              | HexA4HexNAc4-B               | 1.12           | 757.2156             | 2   |
| B09      | 858.7549  | 1.69               | HexA4HexNAc5-B               | 0.50           | 858.7553             | 2   |
| B09      | 1718.5184 | 0.77               | HexA4HexNAc5-B               | -0.27          | 1718.5179            | 1   |
| B10      | 946.7709  | 5.19               | HexA5HexNAc5-B               | 0.50           | 946.7714             | 2   |
| B11      | 1048.3112 | 2.80               | HexA5HexNAc6-B               | -0.13          | 1048.3111            | 2   |
| B12      | 1136.3266 | 23.98              | HexA6HexNAc6-B               | 0.44           | 1136.3271            | 2   |
| B13      | 1237.8659 | 2.13               | HexA6HexNAc7-B               | 0.72           | 1237.8668            | 2   |
| B14      | 883.5860  | 0.23               | HexA7HexNAc7-B               | 0.15           | 883.5861             | 3   |
| B14      | 1325.8829 | 5.55               | HexA7HexNAc7-B               | -0.05          | 1325.8828            | 2   |
| B15      | 977.9314  | 0.35               | HexA7HexNAc8S1-B             | 0.13           | 977.9315             | 3   |
| B18      | 891.9713  | 0.28               | HexA9HexNAc9S2-B             | 0.69           | 891.9719             | 4   |
| B18      | 1189.6308 | 0.39               | HexA9HexNAc9S2-B             | 0.71           | 1189.6316            | 3   |
| B22      | 1101.5159 | 0.20               | HexA11HexNAc11S3-B           | 0.86           | 1101.5169            | 4   |
| Y03      | 640.1393  | 100.00             | Y-Hex2Pen1S1-Ser             | 1.11           | 640.1400             | 1   |
| Y04      | 816.1713  | 9.44               | Y-Hex2HexA1Pen1S1-Ser        | 0.98           | 816.1721             | 1   |
| Y05      | 549.1000  | 13.01              | Y-Hex2HexA1HexNAc1Pen1S2-Ser | 0.92           | 549.1005             | 2   |
| Y06      | 637.1161  | 0.72               | Y-Hex2HexA2HexNAc1Pen1S2-Ser | 0.70           | 637.1165             | 2   |
| Y07      | 518.7537  | 0.59               | Y-Hex2HexA2HexNAc2Pen1S3-Ser | 0.58           | 518.7540             | 3   |
| Y09      | 645.1240  | 4.92               | Y-Hex2HexA3HexNAc3Pen1S3-Ser | 0.76           | 645.1245             | 3   |
| Y10      | 703.8015  | 0.71               | Y-Hex2HexA4HexNAc3Pen1S3-Ser | 0.50           | 703.8019             | 3   |
| Y11      | 598.3581  | 0.75               | Y-Hex2HexA4HexNAc4Pen1S4-Ser | 0.86           | 598.3586             | 4   |
| Y13      | 693.1361  | 3.45               | Y-Hex2HexA5HexNAc5Pen1S4-Ser | 0.55           | 693.1365             | 4   |
| Y14      | 737.1437  | 0.34               | Y-Hex2HexA6HexNAc5Pen1S4-Ser | 1.09           | 737.1445             | 4   |
| Y15      | 646.1209  | 0.74               | Y-Hex2HexA6HexNAc6Pen1S5-Ser | 0.75           | 646.1214             | 5   |
| Y17      | 721.9433  | 1.53               | Y-Hex2HexA7HexNAc7Pen1S5-Ser | 0.52           | 721.9437             | 5   |

**Supplementary Table 31.** Assignment of fragment ions resulted from CID of parent ion  $m/z$  1025.66 ( $z = 7$ ) corresponding to composition dp35-7-Ser. CID mass spectra were acquired on the Bruker FT-ICR mass spectrometer.



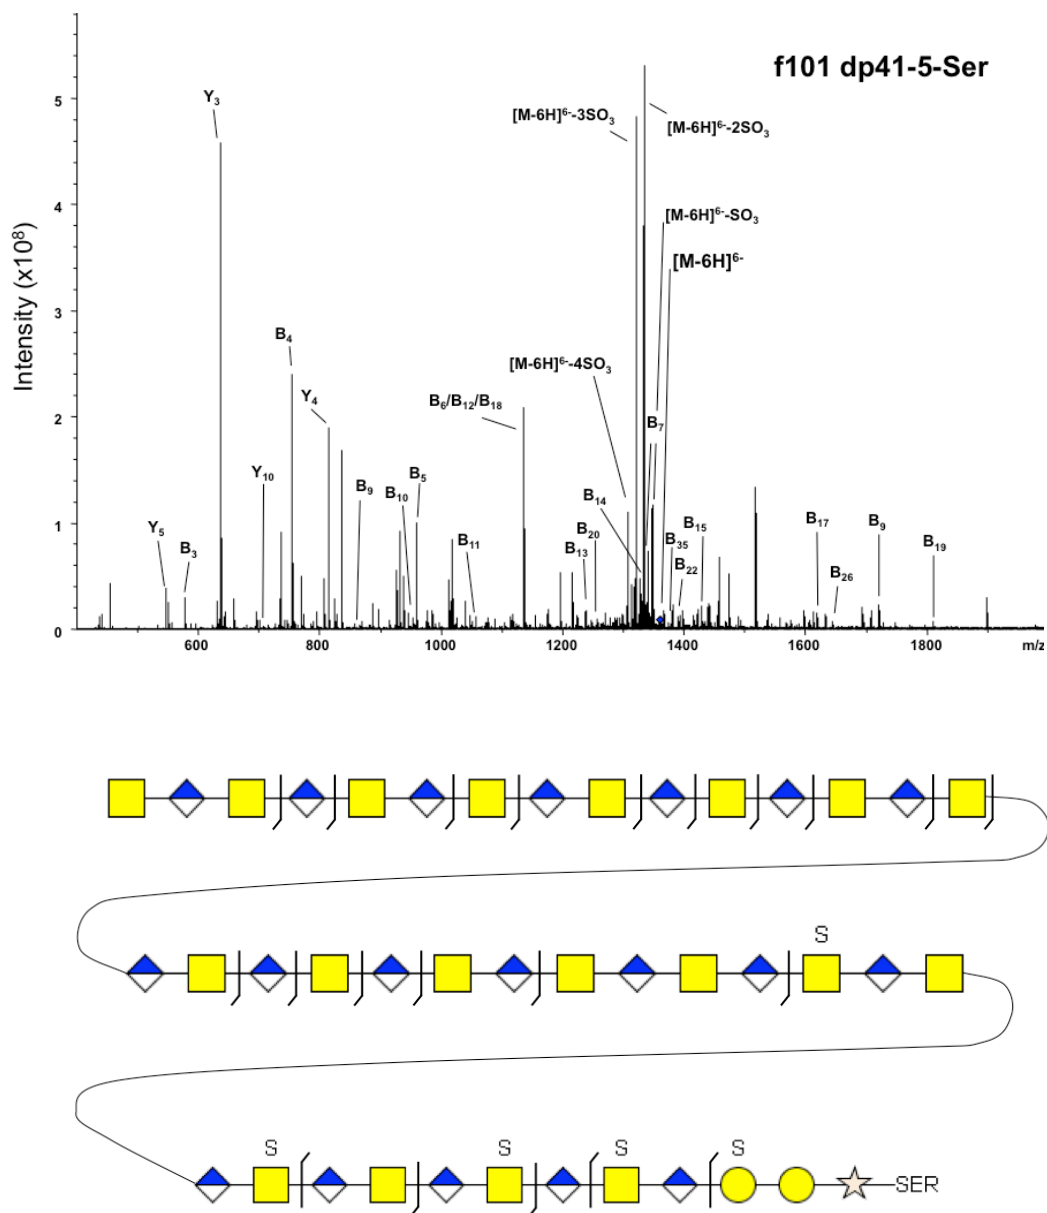

**Supplementary Figure 30.** Annotated spectra from CID-FT-ICR MS/MS in negative ion mode of UTI bikunin pG parent ion  $m/z$  1359.67 ( $z = 6$ ) and its fragmentation pattern providing sequence for composition dp41-5-Ser. Fragment ions assigned in Supplementary Table 32. Partial sequence with 2 ambiguous sulfo groups. All fragment ions were Y<sub>n</sub> or B<sub>n</sub> type.

| Cleavage | $m/z$     | Relative Intensity | Ion                          | Accuracy (ppm) | $m/z_{\text{theor}}$ | $z$ |
|----------|-----------|--------------------|------------------------------|----------------|----------------------|-----|
| B03      | 581.1833  | 5.65               | HexA1HexNAc2-B               | 0.4            | 581.1836             | 1   |
| B04      | 757.2150  | 44.60              | HexA2HexNAc2-B               | 0.9            | 757.2156             | 1   |
| B05      | 960.2941  | 18.86              | HexA2HexNAc3-B               | 1.0            | 960.2950             | 1   |
| B06      | 1136.3261 | 23.28              | HexA3HexNAc3-B               | 0.9            | 1136.3271            | 1   |
| B07      | 1339.4061 | 13.09              | HexA3HexNAc4-B               | 0.3            | 1339.4065            | 1   |
| B09      | 858.7542  | 0.39               | HexA4HexNAc5-B               | 1.3            | 858.7553             | 2   |
| B09      | 1718.5183 | 4.09               | HexA4HexNAc5-B               | -0.2           | 1718.5179            | 1   |
| B10      | 946.7711  | 2.71               | HexA5HexNAc5-B               | 0.3            | 946.7714             | 2   |
| B11      | 1048.3106 | 2.28               | HexA5HexNAc6-B               | 0.4            | 1048.3111            | 2   |
| B12      | 1136.3261 | 23.28              | HexA6HexNAc6-B               | 0.9            | 1136.3271            | 2   |
| B13      | 1237.8665 | 3.52               | HexA6HexNAc7-B               | 0.2            | 1237.8668            | 2   |
| B14      | 1325.8820 | 9.08               | HexA7HexNAc7-B               | 0.6            | 1325.8828            | 2   |
| B15      | 1427.4233 | 4.47               | HexA7HexNAc8-B               | -0.5           | 1427.4225            | 2   |
| B17      | 1616.9779 | 2.56               | HexA8HexNAc9-B               | 0.2            | 1616.9783            | 2   |
| B18      | 1136.3261 | 23.28              | HexA9HexNAc9-B               | 0.9            | 1136.3271            | 3   |
| B19      | 1806.5344 | 1.30               | HexA9HexNAc10-B              | -0.2           | 1806.5340            | 2   |
| B20      | 1262.6968 | 0.94               | HexA10HexNAc10-B             | 0.6            | 1262.6976            | 3   |
| B22      | 1389.0673 | 1.36               | HexA11HexNAc11-B             | 0.6            | 1389.0681            | 3   |
| B26      | 1641.8108 | 1.32               | HexA13HexNAc13-B             | -1.1           | 1641.8091            | 3   |
| B35      | 1376.5626 | 0.63               | HexA17HexNAc18S3-B           | -0.7           | 1376.5617            | 5   |
| Y03      | 640.1394  | 86.13              | Y-Hex2Pen1S1-Ser             | 1.0            | 640.1400             | 1   |
| Y04      | 816.1712  | 34.61              | Y-Hex2HexA1Pen1S1-Ser        | 1.1            | 816.1721             | 1   |
| Y05      | 549.0999  | 6.59               | Y-Hex2HexA1HexNAc1Pen1S2-Ser | 1.1            | 549.1005             | 2   |
| Y10      | 703.8014  | 1.10               | Y-Hex2HexA4HexNAc3Pen1S3-Ser | 0.6            | 703.8019             | 3   |

**Supplementary Table 32.** Assignment of fragment ions resulted from CID of parent ion  $m/z$  1359.67 ( $z = 6$ ) corresponding to composition dp41-5-Ser. CID mass spectra were acquired on the Bruker FT-ICR mass spectrometer.

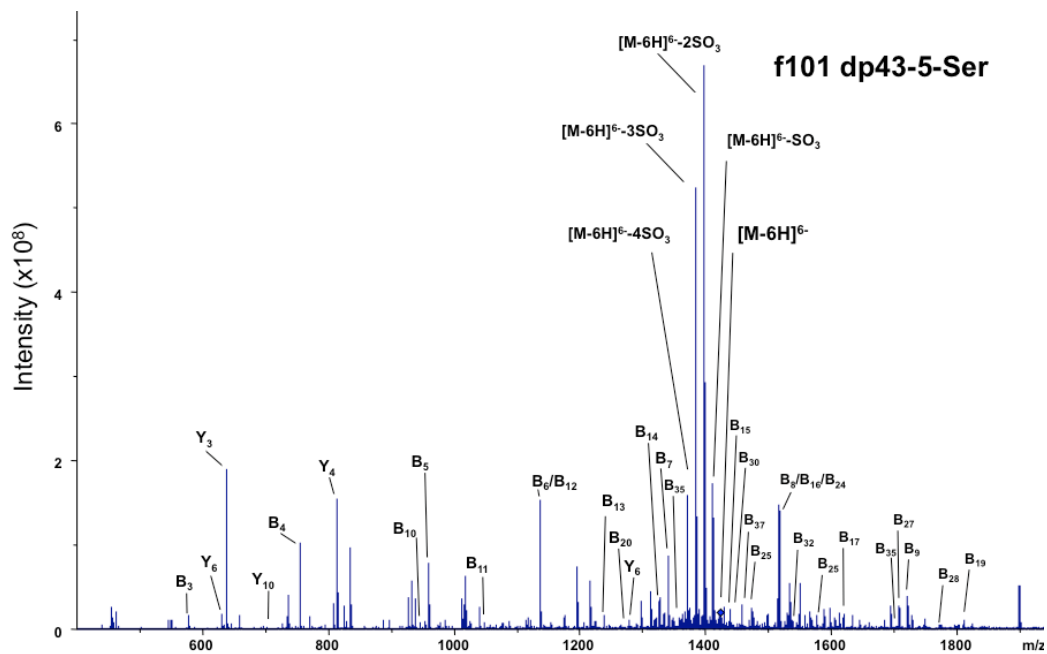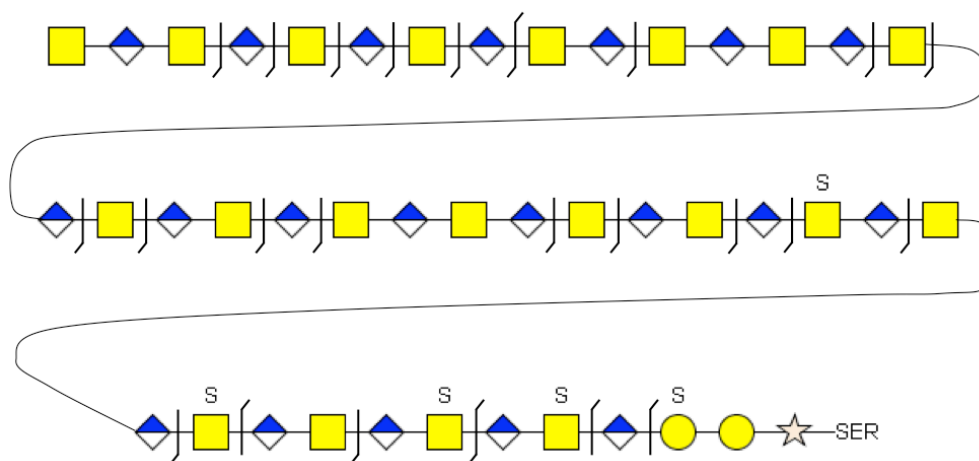

**Supplementary Figure 31.** Annotated spectra from CID-FT-ICR MS/MS in negative ion mode of UTI bikunin pG parent ion  $m/z$   $m/z$  1422.69 ( $z = 6$ ) and its fragmentation pattern providing sequence for composition dp43-5-Ser. Fragment ions assigned in Supplementary Table 33. All fragment ions were  $Y_n$  or  $B_n$  type.

| Cleavage | $m/z$     | Relative Intensity | Ion                          | Accuracy (ppm) | $m/z_{\text{theor}}$ | $z$ |
|----------|-----------|--------------------|------------------------------|----------------|----------------------|-----|
| B03      | 581.1833  | 2.62               | HexA1HexNAc2-B               | 0.4            | 581.1836             | 1   |
| B04      | 757.2151  | 15.81              | HexA2HexNAc2-B               | 0.7            | 757.2156             | 3   |
| B05      | 960.2945  | 12.07              | HexA2HexNAc3-B               | 0.5            | 960.2950             | 6   |
| B06      | 1136.3263 | 14.06              | HexA3HexNAc3-B               | 0.7            | 1136.3271            | 6   |
| B07      | 1339.4062 | 12.86              | HexA3HexNAc4-B               | -0.2           | 1339.4065            | 4   |
| B08      | 1515.4380 | 14.23              | HexA4HexNAc4-B               | 0.4            | 1515.4386            | 2   |
| B09      | 1718.5178 | 5.58               | HexA4HexNAc5-B               | 0.1            | 1718.5179            | 6   |
| B10      | 946.7714  | 1.17               | HexA5HexNAc5-B               | 0.0            | 946.7714             | 1   |
| B11      | 1048.3102 | 1.14               | HexA5HexNAc6-B               | 0.8            | 1048.3111            | 6   |
| B12      | 1136.3263 | 14.06              | HexA6HexNAc6-B               | 0.7            | 1136.3271            | 1   |
| B13      | 1237.8661 | 2.72               | HexA6HexNAc7-B               | 0.6            | 1237.8668            | 2   |
| B14      | 1325.8820 | 6.26               | HexA7HexNAc7-B               | 0.6            | 1325.8828            | 4   |
| B15      | 1427.4211 | 4.00               | HexA7HexNAc8-B               | -1.0           | 1427.4225            | 5   |
| B16      | 1515.4380 | 14.23              | HexA8HexNAc8-B               | 0.4            | 1515.4386            | 3   |
| B17      | 1616.9778 | 2.66               | HexA8HexNAc9-B               | -0.3           | 1616.9783            | 6   |
| B19      | 1806.5324 | 1.55               | HexA9HexNAc10-B              | 0.9            | 1806.5340            | 2   |
| B20      | 1262.6976 | 0.52               | HexA10HexNAc10-B             | 0.0            | 1262.6976            | 4   |
| B24      | 1515.4380 | 14.23              | HexA12HexNAc12-B             | 0.4            | 1515.4386            | 1   |
| B25      | 1456.7608 | 0.93               | HexA11HexNAc12-B             | -0.3           | 1456.7612            | 2   |
| B25      | 1583.1315 | 0.95               | HexA12HexNAc13-B             | -0.1           | 1583.1317            | 5   |
| B27      | 1709.5016 | 0.41               | HexA13HexNAc14-B             | 0.3            | 1709.5022            | 6   |
| B28      | 1768.1788 | 0.90               | HexA14HexNAc14-B             | -0.4           | 1768.1795            | 4   |
| B30      | 1440.6498 | 0.85               | HexA15HexNAc15S1-B           | 0.1            | 1440.6499            | 2   |
| B32      | 1535.4270 | 1.69               | HexA16HexNAc16S1-B           | -0.5           | 1535.4278            | 3   |
| B35      | 1360.5692 | 1.50               | HexA17HexNAc18S2-B           | 0.8            | 1360.5703            | 6   |
| B35      | 1700.9638 | 0.76               | HexA17HexNAc18S2-B           | 0.5            | 1700.9647            | 2   |
| B37      | 1452.3829 | 1.24               | HexA18HexNAc19S3-B           | -0.7           | 1452.3839            | 6   |
| Y03      | 640.1395  | 29.58              | Y-Hex2Pen1S1-Ser             | 0.8            | 640.1400             | 1   |
| Y04      | 816.1714  | 23.76              | Y-Hex2HexA1Pen1S1-Ser        | 0.9            | 816.1721             | 1   |
| Y06      | 637.1162  | 0.88               | Y-Hex2HexA2HexNAc1Pen1S2-Ser | 0.5            | 637.1165             | 2   |
| Y06      | 1275.2392 | 0.60               | Y-Hex2HexA2HexNAc1Pen1S2-Ser | 0.9            | 1275.2404            | 1   |
| Y10      | 703.8007  | 0.35               | Y-Hex2HexA4HexNAc3Pen1S3-Ser | 1.6            | 703.8019             | 3   |

**Supplementary Table 33.** Assignment of fragment ions resulted from CID of parent ion  $m/z$  1422.69 ( $z = 6$ ) corresponding to composition dp43-5-Ser. CID mass spectra were acquired on the Bruker FT-ICR mass spectrometer.

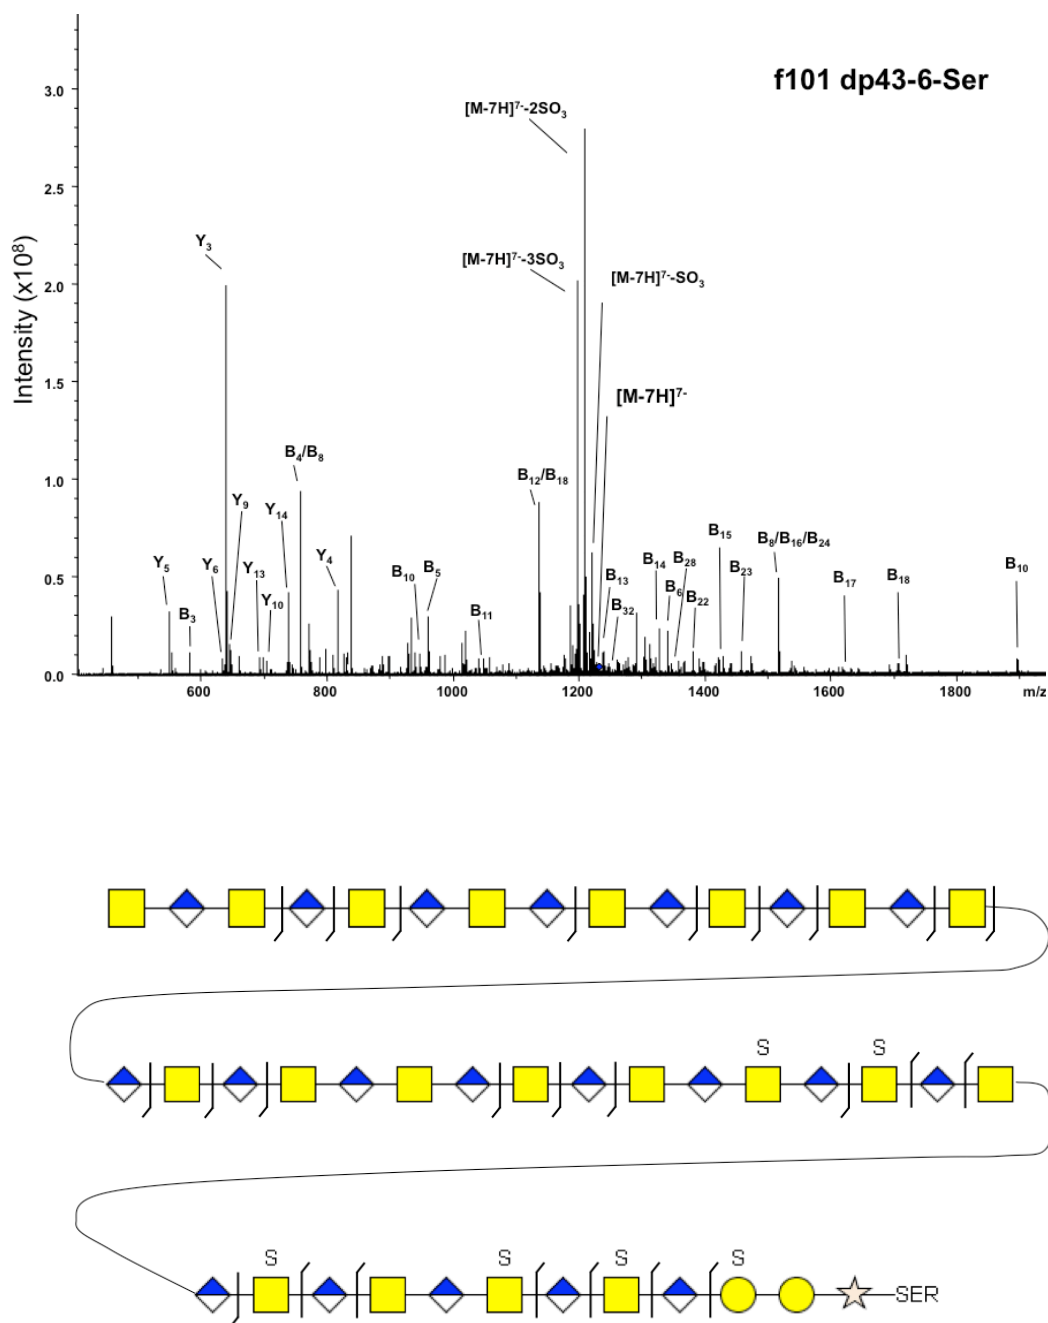

**Supplementary Figure 32.** Annotated spectra from CID-FT-ICR MS/MS in negative ion mode of UTI bikunin pG parent ion  $m/z$  1436.18 ( $z = 6$ ) and its fragmentation pattern providing sequence for composition dp43-6-Ser. Fragment ions assigned in Supplementary Table 34. Partial sequence with 2 ambiguous sulfo groups. All fragment ions were  $Y_n$  or  $B_n$  type.

| Cleavage | $m/z$     | Relative Intensity | Ion                          | Accuracy (ppm) | $m/z_{\text{theor}}$ | $z$ |
|----------|-----------|--------------------|------------------------------|----------------|----------------------|-----|
| B03      | 581.1840  | 5.69               | HexA1HexNAc2-B               | 0.8            | 581.1836             | 1   |
| B04      | 757.2164  | 46.44              | HexA2HexNAc2-B               | 1.0            | 757.2156             | 1   |
| B05      | 960.2958  | 14.48              | HexA2HexNAc3-B               | 0.9            | 960.2950             | 1   |
| B06      | 1339.4075 | 10.48              | HexA3HexNAc4-B               | 0.7            | 1339.4065            | 1   |
| B08      | 757.2164  | 46.44              | HexA4HexNAc4-B               | 1.0            | 757.2156             | 2   |
| B08      | 1515.4373 | 5.66               | HexA4HexNAc4-B               | -0.8           | 1515.4386            | 1   |
| B10      | 946.7716  | 4.56               | HexA5HexNAc5-B               | 0.3            | 946.7714             | 2   |
| B10      | 1894.5490 | 3.95               | HexA5HexNAc5-B               | -0.6           | 1894.5500            | 1   |
| B11      | 1048.3113 | 3.47               | HexA5HexNAc6-B               | 0.2            | 1048.3111            | 2   |
| B12      | 1136.3274 | 27.26              | HexA6HexNAc6-B               | 0.3            | 1136.3271            | 2   |
| B13      | 1237.8669 | 6.10               | HexA6HexNAc7-B               | 0.1            | 1237.8668            | 2   |
| B14      | 1325.8828 | 12.41              | HexA7HexNAc7-B               | 0.0            | 1325.8828            | 2   |
| B15      | 1427.4217 | 4.49               | HexA7HexNAc8-B               | -0.5           | 1427.4225            | 2   |
| B16      | 1515.4373 | 5.66               | HexA8HexNAc8-B               | -0.8           | 1515.4386            | 2   |
| B17      | 1616.9790 | 2.00               | HexA8HexNAc9-B               | 0.5            | 1616.9783            | 2   |
| B18      | 1136.3274 | 27.26              | HexA9HexNAc9-B               | 0.3            | 1136.3271            | 3   |
| B18      | 1704.9916 | 2.81               | HexA18HexNAc18-B             | -1.6           | 1704.9943            | 4   |
| B22      | 1389.0679 | 4.00               | HexA11HexNAc11-B             | -0.2           | 1389.0681            | 3   |
| B23      | 1456.7617 | 1.45               | HexA11HexNAc12-B             | 0.3            | 1456.7612            | 3   |
| B24      | 1515.4373 | 5.66               | HexA12HexNAc12-B             | -0.8           | 1515.4386            | 3   |
| B28      | 1345.8724 | 1.91               | HexA14HexNAc14S1-B           | 0.3            | 1345.8720            | 4   |
| B32      | 1244.1326 | 1.57               | HexA16HexNAc16S2-B           | 0.4            | 1244.1321            | 5   |
| Y03      | 640.1405  | 98.54              | Y-Hex2Pen1S1-Ser             | 0.8            | 640.1400             | 1   |
| Y04      | 816.1727  | 21.11              | Y-Hex2HexA1Pen1S1-Ser        | 0.7            | 816.1721             | 1   |
| Y05      | 549.1011  | 14.42              | Y-Hex2HexA1HexNAc1Pen1S2-Ser | 1.1            | 549.1005             | 2   |
| Y06      | 637.1170  | 2.17               | Y-Hex2HexA2HexNAc1Pen1S2-Ser | 0.7            | 637.1165             | 2   |
| Y09      | 645.1250  | 6.03               | Y-Hex2HexA3HexNAc3Pen1S3-Ser | 0.8            | 645.1245             | 3   |
| Y10      | 703.8026  | 2.50               | Y-Hex2HexA4HexNAc3Pen1S3-Ser | 1.1            | 703.8019             | 3   |
| Y13      | 693.1368  | 4.21               | Y-Hex2HexA5HexNAc5Pen1S4-Ser | 0.4            | 693.1365             | 4   |
| Y14      | 737.1451  | 1.11               | Y-Hex2HexA6HexNAc5Pen1S4-Ser | 0.8            | 737.1445             | 4   |

**Supplementary Table 34.** Assignment of fragment ions resulted from CID of parent ion  $m/z$  1436.18 ( $z = 6$ ) corresponding to composition dp43-6-Ser. CID mass spectra were acquired on the Bruker FT-ICR mass spectrometer.

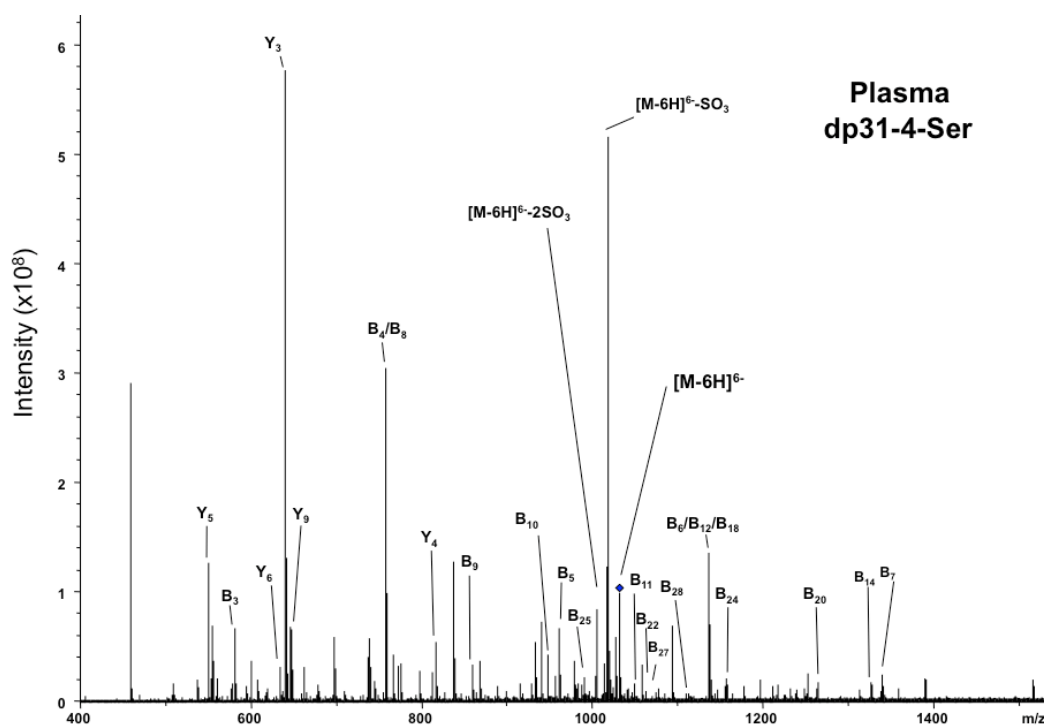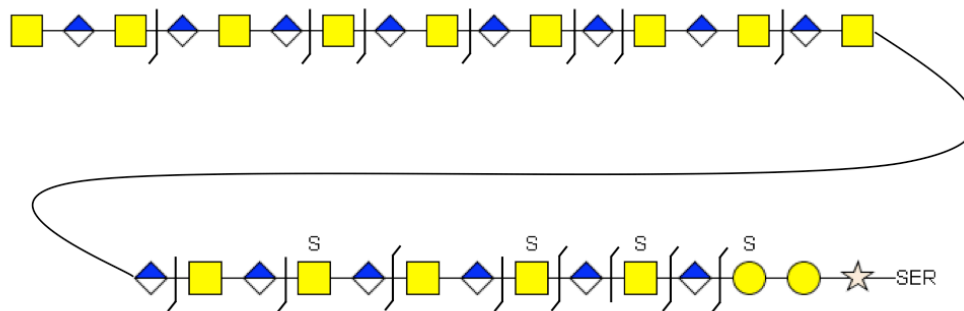

**Supplementary Figure 33.** Annotated spectra from CID-FT-ICR MS/MS in negative ion mode of pooled human plasma bikunin pG parent ion  $m/z$  1030.43 ( $z = 6$ ) and its fragmentation pattern providing sequence for composition dp31-4-Ser. Fragment ions assigned in Supplementary Table 35. All fragment ions were Y<sub>n</sub> or B<sub>n</sub> type.

| Cleavage | $m/z$     | Relative Intensity | Ion                          | Accuracy (ppm) | $m/z_{\text{theor}}$ | $z$ |
|----------|-----------|--------------------|------------------------------|----------------|----------------------|-----|
| B03      | 581.1831  | 11.89              | HexA1HexNAc2-B               | 0.8            | 581.1836             | 1   |
| B04      | 757.2150  | 53.01              | HexA2HexNAc2-B               | 0.9            | 757.2156             | 1   |
| B05      | 960.2945  | 11.21              | HexA2HexNAc3-B               | 0.5            | 960.2950             | 1   |
| B06      | 1136.3261 | 15.31              | HexA3HexNAc3-B               | 0.9            | 1136.3271            | 1   |
| B07      | 1339.4055 | 4.01               | HexA3HexNAc4-B               | 0.7            | 1339.4065            | 1   |
| B08      | 757.2150  | 53.01              | HexA4HexNAc4-B               | 0.9            | 757.2156             | 2   |
| B09      | 858.7550  | 5.57               | HexA4HexNAc5-B               | 0.4            | 858.7553             | 2   |
| B10      | 946.7709  | 6.54               | HexA10HexNAc10-B             | 0.5            | 946.7714             | 4   |
| B11      | 1048.3106 | 3.00               | HexA5HexNAc6-B               | 0.4            | 1048.3111            | 2   |
| B12      | 1136.3261 | 15.31              | HexA6HexNAc6-B               | 0.9            | 1136.3271            | 2   |
| B14      | 1325.8812 | 3.00               | HexA7HexNAc7-B               | 1.2            | 1325.8828            | 2   |
| B18      | 1136.3261 | 15.31              | HexA9HexNAc9-B               | 0.9            | 1136.3271            | 3   |
| B20      | 1262.6965 | 2.89               | HexA10HexNAc10-B             | 0.9            | 1262.6976            | 3   |
| B22      | 1061.5369 | 1.66               | HexA11HexNAc11S1-B           | 1.5            | 1061.5384            | 4   |
| B24      | 1156.3151 | 3.27               | HexA12HexNAc12S1-B           | 1.0            | 1156.3163            | 4   |
| B25      | 981.4580  | 2.87               | HexA12HexNAc13S2-B           | 0.8            | 981.4588             | 5   |
| B27      | 1073.2708 | 1.14               | HexA13HexNAc14S3-B           | 1.6            | 1073.2725            | 5   |
| B28      | 1108.4772 | 1.29               | HexA14HexNAc14S3-B           | 1.5            | 1108.4789            | 5   |
| Y03      | 640.1395  | 100.00             | Y-Hex2Pen1S1-Ser             | 0.8            | 640.1400             | 1   |
| Y04      | 816.1710  | 9.03               | Y-Hex2HexA1Pen1S1-Ser        | 1.3            | 816.1721             | 1   |
| Y05      | 549.1001  | 20.27              | Y-Hex2HexA1HexNAc1Pen1S2-Ser | 0.7            | 549.1005             | 2   |
| Y06      | 637.1160  | 1.37               | Y-Hex2HexA2HexNAc1Pen1S2-Ser | 0.9            | 637.1165             | 2   |
| Y09      | 645.1244  | 10.26              | Y-Hex2HexA3HexNAc3Pen1S3-Ser | 0.1            | 645.1245             | 3   |

**Supplementary Table 35.** Assignment of fragment ions resulted from CID of parent ion  $m/z$  1030.43 ( $z = 6$ ) corresponding to composition dp31-4-Ser of human plasma bikunin pG. CID mass spectra were acquired on the Bruker FT-ICR mass spectrometer.



| dp# <sub>a</sub> | Disacch-arides <sub>b</sub> | Sequences possible based on: |                             |                                  |                                       |                                        | MS sequencing <sub>h</sub> |
|------------------|-----------------------------|------------------------------|-----------------------------|----------------------------------|---------------------------------------|----------------------------------------|----------------------------|
|                  |                             | Odd and even dp <sub>c</sub> | Odd or even dp <sub>d</sub> | 4-9 sulfation sites <sub>e</sub> | Two less sulfation sites <sub>f</sub> | Four less sulfation sites <sub>g</sub> |                            |
| 20               | 10                          | 3.E+03                       | 1.E+03                      | 8.E+02                           | 5E+02                                 |                                        |                            |
| 21               |                             |                              | 2.E+03                      | 2.E+03                           | 5E+02                                 | 99                                     |                            |
| 22               | 11                          | 6.E+03                       | 2.E+03                      | 2.E+03                           | 1E+03                                 |                                        |                            |
| 23               |                             |                              | 4.E+03                      | 4.E+03                           | 1E+03                                 | 120                                    | 4                          |
| 24               | 12                          | 1.E+04                       | 4.E+03                      | 4.E+03                           | 1E+03                                 |                                        | 4                          |
| 25               |                             |                              | 8.E+03                      | 7.E+03                           | 2E+03                                 | 219                                    | 4                          |
| 26               | 13                          | 2.E+04                       | 8.E+03                      | 7E+03                            | 2E+03                                 |                                        | 4                          |
| 27               |                             |                              | 1.E+04                      | 1E+04                            | 4E+03                                 | 465                                    | 4                          |
| 28               | 14                          | 5.E+04                       | 2.E+04                      | 1E+04                            | 4E+03                                 |                                        | 4                          |
| 29               |                             |                              | 3.E+04                      | 3E+04                            | 7E+03                                 | 957                                    | 4                          |
| 30               | 15                          | 1.E+05                       | 3.E+04                      | 3E+04                            | 7E+03                                 |                                        | 4                          |
| 31               |                             |                              | 7.E+04                      | 5.E+04                           | 1E+04                                 | 1914                                   | 4                          |
| 32               | 16                          | 2.E+05                       | 7.E+04                      | 5.E+04                           | 1E+04                                 |                                        | 4                          |
| 33               |                             |                              | 1.E+05                      | 9.E+04                           | 2E+04                                 | 3718                                   | 4                          |
| 34               | 17                          | 4.E+05                       | 1.E+05                      | 9.E+04                           | 2E+04                                 |                                        | 4                          |
| 35               |                             |                              | 3.E+05                      | 2.E+05                           | 4E+04                                 | 7007                                   | 4                          |
| 36               | 18                          | 8.E+05                       | 3.E+05                      | 2.E+05                           | 4E+04                                 |                                        | 4                          |
| 37               |                             |                              | 5.E+05                      | 3.E+05                           | 7E+04                                 | 12805                                  | 4                          |
| 38               | 19                          | 2.E+06                       | 5.E+05                      | 3.E+05                           | 7E+04                                 |                                        | 4                          |
| 39               |                             |                              | 1.E+06                      | 4.E+05                           | 1E+05                                 | 22698                                  | 4                          |
| 40               | 20                          | 3.E+06                       | 1.E+06                      | 4.E+05                           | 1.E+05                                |                                        | 4                          |
| 41               |                             |                              | 2.E+06                      | 7.E+05                           | 2.E+05                                | 39066                                  | 4                          |
| 42               | 21                          | 6.E+06                       | 2.E+06                      | 7.E+05                           | 2.E+05                                |                                        | 4                          |
| 43               |                             |                              | 4.E+06                      | 1.E+06                           | 3.E+05                                | 65382                                  | 4                          |
| 44               | 22                          | 1.E+07                       | 4.E+06                      | 1.E+06                           | 3.E+05                                |                                        | 4                          |
| 45               |                             |                              | 8.E+06                      | 2.E+06                           | 4.E+05                                | 106590                                 | 4                          |
| 46               | 23                          | 3.E+07                       | 8.E+06                      | 2.E+06                           | 4.E+05                                |                                        | 4                          |
| 47               |                             |                              | 2.E+07                      | 3.E+06                           | 6.E+05                                | 169575                                 | 4                          |
| 48               | 24                          | 5.E+07                       | 2.E+07                      | 3.E+06                           | 6.E+05                                |                                        | 4                          |
| 49               |                             |                              | 3.E+07                      | 4.E+06                           | 9.E+05                                | 263739                                 | 4                          |

|                            |    |        |              |              |              |             |             |
|----------------------------|----|--------|--------------|--------------|--------------|-------------|-------------|
| 50                         | 25 | 1.E+08 | 3.E+07       | 4.E+06       | 9.E+05       |             | 4           |
| 51                         |    |        | 7.E+07       | 6.E+06       | 1.E+06       | 401698      | 4           |
| 52                         | 26 | 2.E+08 | 7.E+07       | 6.E+06       | 1.E+06       |             | 4           |
| 53                         |    |        | 1.E+08       | 8.E+06       | 2.E+06       | 600116      | 4           |
| 54                         | 27 | 4.E+08 | 1.E+08       | 8.E+06       | 2.E+06       |             | 4           |
| 55                         |    |        | 3.E+08       | 1.E+07       | 3.E+06       | 880693      | 4           |
| 56                         | 28 | 8.E+08 | 3.E+08       | 1.E+07       | 3.E+06       |             | 4           |
| 57                         |    |        | 5.E+08       | 2.E+07       | 4.E+06       | 1271325     | 4           |
| 58                         | 29 | 2.E+09 | 5.E+08       | 2.E+07       | 4.E+06       |             | 4           |
| 59                         |    |        | 1.E+09       | 2.E+07       | 5.E+06       | 1807455     | 4           |
| 60                         | 30 | 3.E+09 | 1.E+09       | 2.E+07       | 5.E+06       |             | 4           |
| 61                         |    |        | 2.E+09       | 3.E+07       | 6.E+06       | 2533635     |             |
| <b>NUMBER OF SEQUENCES</b> |    |        | ~210 billion | ~910 million | ~570 million | ~43 million | <b>~150</b> |

**Supplementary Table 36.** Decreasing number of bikunin GAG chain sequences with increasing experimentally determined constraints. Summed at the bottom are the total numbers of sequences for each column of constraints.

Footnotes correspond to the following:

*a* Degree of polymerization number (dp #), or number of monosaccharides, is shown since there are both odd numbered and even numbered GAGs.

*b* Number of disaccharides ranging from 10 to 30 repeating units, as estimated by PAGE and confirmed by FTMS and FT-ICR MS.

*c* Number of possible sequences with repetitions allowed for both odd and even numbered chains estimated as comprising of either GalNAc4S-GlcA or GalNAc-GlcA calculated as  $n^r + n^{r+1}$ , where  $n$  is the types of disaccharides possible and  $r$  is the number of times either repeating unit might be chosen to determine chain length.

*d* Number of possible sequences allowing either odd,  $n^{r+1}$ , or even,  $n^r$ , numbered chains.

*e* Number of possible sequences limiting the number of sulfates to 4-9 for each size GAG using  $\sum_n C_r$ , where  $n$  is the number of sulfation sites and  $r$  is the number of sulfates.

*f* Number of possible sequences with two less sulfation sites from the RE to the Gal4S for each sized GAG with one less numbers of sulfates (3-8) than *e* using  $\sum_n C_r$ , where  $n$  is the number of sulfation sites and  $r$  is the number of sulfates.

*g* Number of possible sequences with four less sulfation sites to include the trisaccharide NRE for each sized GAG than *f* using  $\sum_n C_r$ , where  $n$  is the number of sulfation sites and  $r$  is the number of sulfates.

*h* Number of possible sequences based on all experimental MS observations, estimating the sulfate number on average to be 4-7 for dp23-60 (although experimentally 104 compositions were identified).

| GAG length | Number of Sulfo Groups |          |          |          |          |           |          |          |          |           |          |          |          |          |          |          |
|------------|------------------------|----------|----------|----------|----------|-----------|----------|----------|----------|-----------|----------|----------|----------|----------|----------|----------|
|            | 4                      |          |          |          | 5        |           |          |          | 6        |           |          |          | 7        |          |          |          |
|            | Subdomains             |          |          |          |          |           |          |          |          |           |          |          |          |          |          |          |
|            | d                      | c        | b        | a        | d        | c         | b        | a        | d        | c         | b        | a        | d        | c        | b        | a        |
| dp23       | 0                      | 2        | 0        | 2        | 0        | 0         | 0        | 3        | 0        | 0         | 2        | 2        |          |          |          |          |
| dp24       | 1                      | 2        | 0        | 2        | 1        | 0         | 0        | 3        | 1        | 0         | 2        | 2        |          |          |          |          |
| dp25       | 0                      | 3        | 0        | 2        | 0        | 1         | 0        | 3        | 0        | 1         | 2        | 2        | 0        | -1       | 2        | 3        |
| dp26       | 1                      | 3        | 0        | 2        | 1        | 1         | 0        | 3        | 1        | 1         | 2        | 2        | 1        | -1       | 2        | 3        |
| dp27       | 0                      | 4        | 0        | 2        | <b>0</b> | <b>2</b>  | <b>0</b> | <b>3</b> | <b>0</b> | <b>2</b>  | <b>2</b> | <b>2</b> | 0        | 0        | 2        | 3        |
| dp28       | 1                      | 4        | 0        | 2        | 1        | 2         | 0        | 3        | 1        | 2         | 2        | 2        | 1        | 0        | 2        | 3        |
| dp29       | <b>0</b>               | <b>5</b> | <b>0</b> | <b>2</b> | 0        | 3         | 0        | 3        | <b>0</b> | <b>3</b>  | <b>2</b> | <b>2</b> | 0        | 1        | 2        | 3        |
| dp30       | 1                      | 5        | 0        | 2        | 1        | 3         | 0        | 3        | 1        | 3         | 2        | 2        | 1        | 1        | 2        | 3        |
| dp31       | <b>0</b>               | <b>6</b> | <b>0</b> | <b>2</b> | <b>0</b> | <b>4</b>  | <b>0</b> | <b>3</b> | <b>0</b> | <b>4</b>  | <b>2</b> | <b>2</b> | 0        | 2        | 2        | 3        |
| dp32       | 1                      | 6        | 0        | 2        | 1        | 4         | 0        | 3        | 1        | 4         | 2        | 2        | 1        | 2        | 2        | 3        |
| dp33       | 0                      | 7        | 0        | 2        | <b>0</b> | <b>5</b>  | <b>0</b> | <b>3</b> | <b>0</b> | <b>5</b>  | <b>2</b> | <b>2</b> | 0        | 3        | 2        | 3        |
| dp34       | 1                      | 7        | 0        | 2        | 1        | 5         | 0        | 3        | 1        | 5         | 2        | 2        | 1        | 3        | 2        | 3        |
| dp35       | 0                      | 8        | 0        | 2        | <b>0</b> | <b>6</b>  | <b>0</b> | <b>3</b> | <b>0</b> | <b>6</b>  | <b>2</b> | <b>2</b> | <b>0</b> | <b>4</b> | <b>2</b> | <b>3</b> |
| dp36       | 1                      | 8        | 0        | 2        | 1        | 6         | 0        | 3        | 1        | 6         | 2        | 2        | 1        | 4        | 2        | 3        |
| dp37       | 0                      | 9        | 0        | 2        | 0        | 7         | 0        | 3        | 0        | 7         | 2        | 2        | 0        | 5        | 2        | 3        |
| dp38       | 1                      | 9        | 0        | 2        | 1        | 7         | 0        | 3        | 1        | 7         | 2        | 2        | 1        | 5        | 2        | 3        |
| dp39       | 0                      | 10       | 0        | 2        | 0        | 8         | 0        | 3        | 0        | 8         | 2        | 2        | 0        | 6        | 2        | 3        |
| dp40       | 1                      | 10       | 0        | 2        | 1        | 8         | 0        | 3        | 1        | 8         | 2        | 2        | 1        | 6        | 2        | 3        |
| dp41       | 0                      | 11       | 0        | 2        | <b>0</b> | <b>9</b>  | <b>0</b> | <b>3</b> | 0        | 9         | 2        | 2        | 0        | 7        | 2        | 3        |
| dp42       | 1                      | 11       | 0        | 2        | 1        | 9         | 0        | 3        | 1        | 9         | 2        | 2        | 1        | 7        | 2        | 3        |
| dp43       | 0                      | 12       | 0        | 2        | <b>0</b> | <b>10</b> | <b>0</b> | <b>3</b> | <b>0</b> | <b>10</b> | <b>2</b> | <b>2</b> | 0        | 8        | 2        | 3        |
| dp44       | 1                      | 12       | 0        | 2        | 1        | 10        | 0        | 3        | 1        | 10        | 2        | 2        | 1        | 8        | 2        | 3        |
| dp45       | 0                      | 13       | 0        | 2        | 0        | 11        | 0        | 3        | 0        | 11        | 2        | 2        | 0        | 9        | 2        | 3        |
| dp46       | 1                      | 13       | 0        | 2        | 1        | 11        | 0        | 3        | 1        | 11        | 2        | 2        | 1        | 9        | 2        | 3        |
| dp47       | 0                      | 14       | 0        | 2        | 0        | 12        | 0        | 3        | 0        | 12        | 2        | 2        | 0        | 10       | 2        | 3        |
| dp48       | 1                      | 14       | 0        | 2        | 1        | 12        | 0        | 3        | 1        | 12        | 2        | 2        | 1        | 10       | 2        | 3        |
| dp49       | 0                      | 15       | 0        | 2        | 0        | 13        | 0        | 3        | 0        | 13        | 2        | 2        | 0        | 11       | 2        | 3        |
| dp50       | 1                      | 15       | 0        | 2        | 1        | 13        | 0        | 3        | 1        | 13        | 2        | 2        | 1        | 11       | 2        | 3        |
| dp51       | 0                      | 16       | 0        | 2        | 0        | 14        | 0        | 3        | 0        | 14        | 2        | 2        | 0        | 12       | 2        | 3        |
| dp52       | 1                      | 16       | 0        | 2        | 1        | 14        | 0        | 3        | 1        | 14        | 2        | 2        | 1        | 12       | 2        | 3        |
| dp53       | 0                      | 17       | 0        | 2        | 0        | 15        | 0        | 3        | 0        | 15        | 2        | 2        | 0        | 13       | 2        | 3        |
| dp54       | 1                      | 17       | 0        | 2        | 1        | 15        | 0        | 3        | 1        | 15        | 2        | 2        | 1        | 13       | 2        | 3        |
| dp55       | 0                      | 18       | 0        | 2        | 0        | 16        | 0        | 3        | 0        | 16        | 2        | 2        | 0        | 14       | 2        | 3        |
| dp56       | 1                      | 18       | 0        | 2        | 1        | 16        | 0        | 3        | 1        | 16        | 2        | 2        | 1        | 14       | 2        | 3        |
| dp57       | 0                      | 19       | 0        | 2        | 0        | 17        | 0        | 3        | 0        | 17        | 2        | 2        | 0        | 15       | 2        | 3        |
| dp58       | 1                      | 19       | 0        | 2        | 1        | 17        | 0        | 3        | 1        | 17        | 2        | 2        | 1        | 15       | 2        | 3        |
| dp59       | 0                      | 20       | 0        | 2        | 0        | 18        | 0        | 3        | 0        | 18        | 2        | 2        | 0        | 16       | 2        | 3        |
| dp60       | 1                      | 20       | 0        | 2        | 1        | 18        | 0        | 3        | 1        | 18        | 2        | 2        | 1        | 16       | 2        | 3        |

**Supplementary Table 37.** Subdomains (d.c.b.a) in chains dp23 through dp60 with 4 to 7 sulfo groups. Structures elucidated and assigned from MS/MS experiments are shown in bold and shaded. Subdomains a and b are part of the sulfated domain near the reducing end while subdomain c is part of the nonsulfated domain near the non-reducing end. Subdomain d accounts for odd and even numbered chains.
